# Supplementary material for: Epidemiology and medical service use for spontaneous pneumothorax: a 12-year study using nationwide cohort data in Korea
Source: PubMed Central journal article supplement — BMJ Open. 2019 Oct 28;9(10):e028624. doi: 10.1136/bmjopen-2018-028624 (PMC6830684; doi:10.1136/bmjopen-2018-028624), 2019-10-28
Supplement: bmjopen-2018-028624.draft_revisions.pdf [file bmjopen-2018-028624.draft_revisions.pdf]

# BMJ Open

BMJ Open is committed to open peer review. As part of this commitment we make the peer review history of every article we publish publicly available.

When an article is published we post the peer reviewers' comments and the authors' responses online. We also post the versions of the paper that were used during peer review. These are the versions that the peer review comments apply to.

The versions of the paper that follow are the versions that were submitted during the peer review process. They are not the versions of record or the final published versions. They should not be cited or distributed as the published version of this manuscript.

BMJ Open is an open access journal and the full, final, typeset and author-corrected version of record of the manuscript is available on our site with no access controls, subscription charges or pay-per-view fees (<http://bmjopen.bmj.com>).

If you have any questions on BMJ Open's open peer review process please email [info.bmjopen@bmj.com](mailto:info.bmjopen@bmj.com)

# BMJ Open

## Epidemiology and Medical Service Use for Spontaneous Pneumothorax: A 12-year Longitudinal Study Using Nationwide Cohort Data

|                               |                                                                                                                                                                                                                                                                                                                                                                  |
|-------------------------------|------------------------------------------------------------------------------------------------------------------------------------------------------------------------------------------------------------------------------------------------------------------------------------------------------------------------------------------------------------------|
| Journal:                      | <i>BMJ Open</i>                                                                                                                                                                                                                                                                                                                                                  |
| Manuscript ID                 | bmjopen-2018-028624                                                                                                                                                                                                                                                                                                                                              |
| Article Type:                 | Research                                                                                                                                                                                                                                                                                                                                                         |
| Date Submitted by the Author: | 20-Dec-2018                                                                                                                                                                                                                                                                                                                                                      |
| Complete List of Authors:     | Kim, Duri; Jaseng Spine and Joint Research Institute<br>Jung, boyoung; Jaseng Spine and Joint Research Institute<br>Jang, Bo-Hyoung; Department of Preventive Medicine<br>Chung, Seol Hee ; Health Insurance Review & Assessment Service<br>Lee, Yoon Jae ; Jaseng Spine and Joint Research Institute<br>Ha, In-Hyuk ; Jaseng Spine and Joint Research Institute |
| Keywords:                     | EPIDEMIOLOGY, Longitudinal cohort, National Health Insurance Service-Sample Cohort Database (NHIS-SCD), Prevalence, Primary Spontaneous Pneumothorax                                                                                                                                                                                                             |
|                               |                                                                                                                                                                                                                                                                                                                                                                  |

SCHOLARONE™  
Manuscripts

1  
2  
3  
4 **Epidemiology and Medical Service Use for Spontaneous Pneumothorax: A 12-year**  
5 **Longitudinal Study Using Nationwide Cohort Data**  
6  
7  
8  
9

10  
11 Doori Kim<sup>1,2</sup>, Boyoung Jung<sup>1</sup>, Bo-Hyoung Jang<sup>3</sup>, Seol Hee Chung<sup>4</sup>, Yoon Jae Lee<sup>1\*</sup>, In-Hyuk  
12 Ha<sup>1\*</sup>  
13

14  
15 <sup>1</sup>Jaseng Spine and Joint Research Institute, Jaseng Medical Foundation, 3F 538 Gangnam-  
16 daero, Gangnam-gu, Seoul, Republic of Korea  
17

18  
19 <sup>2</sup>Department of Korean Preventive Medicine, College of Korean Medicine, Graduate School,  
20 Kyung Hee University, Hoegi-dong, Dongdaemun-gu, Seoul, 130-701, Republic of Korea  
21

22  
23 <sup>3</sup>Department of Preventive Medicine, College of Korean Medicine, Kyung Hee University,  
24 Hoegi-dong, Dongdaemun-gu, Seoul, 02447, Republic of Korea  
25

26  
27 <sup>4</sup>Department of Research, Health Insurance Review & Assessment Service, 60 Hyeoksin-ro  
28 (Bangok-dong), Wonju-si, Gangwon-do 26465, South Korea  
29

30  
31  
32  
33  
34 \*Correspondence should be addressed to: [hanihata@jaseng.org](mailto:hanihata@jaseng.org)(In-HyukHa) and  
35 [goodsmile@jaseng.org](mailto:goodsmile@jaseng.org) (Yoon Jae Lee)  
36  
37  
38  
39  
40

41 In-Hyuk Ha  
42

43 Jaseng Spine and Joint Research Institute, Jaseng Medical Foundation, 3F 538 Gangnam-  
44 daero, Gangnam-gu, Seoul, Republic of Korea  
45

46  
47 Tel: +82-2-2222-2740  
48

49  
50 Fax: +82-2-2222-2737  
51

52  
53 Mobile: +82-10-6659-4910  
54

55  
56 Email: [hanihata@jaseng.org](mailto:hanihata@jaseng.org)  
57

## Abstract

**Objectives:** To analyze the prevalence rate and treatment of spontaneous pneumothorax according to sociodemographic characteristics, in order to obtain detailed and objective information about spontaneous pneumothorax.

**Design:** A 12-year longitudinal nationwide cohort study.

**Setting:** Data obtained from the Korean National Health Insurance Service Sharing Service.

**Participants:** A total of 4658 participants who used medical services due to spontaneous pneumothorax between 2002 and 2013.

**Outcome measures:** For those diagnosed with spontaneous pneumothorax, the use of medical services, hospitalization data, sociodemographics, co-morbidity, treatment administered, and medication prescribed were recorded.

**Results:** The annual prevalence of spontaneous pneumothorax ranged from 39 to 66 per 100,000, while the rate of hospitalization due to spontaneous pneumothorax ranged from 18 to 36 per 100,000. The prevalence rate of spontaneous pneumothorax in Korea has increased since 2002. The male-to-female ratio was approximately 4–10:1, with a higher prevalence rate in males. By age, the 15–34-year-old group, and particularly 15–19-year-olds, showed the highest prevalence rate; the rate then declined before increasing again for those 65 years old or older. In total, 47–57% of spontaneous pneumothorax patients underwent hospitalization. The average number of rehospitalizations due to pneumothorax was 1.56 per person, and more than 70% of recurrences occurred within 1 year. Chronic obstructive pulmonary disease was the most common comorbidity. The average treatment period was 11 days as an outpatient and 14 days in-hospital. The average medical costs were \$94.50 for outpatients and \$2523 for hospital admissions. The most common treatment for spontaneous pneumothorax was oxygen inhalation and thoracostomy, and the most commonly prescribed medications were analgesics, antitussives, and antibiotics.

**Conclusions:** We here detailed the epidemiology and treatments for spontaneous pneumothorax in Korea. This information can contribute to the understanding of spontaneous pneumothorax.

1  
2  
3  
4 **Keywords:** Epidemiology, Longitudinal cohort, National Health Insurance Service-Sample  
5 Cohort Database (NHIS-SCD); Prevalence; Primary Spontaneous Pneumothorax  
6  
7  
8  
9  
10

### 11 **Strengths and limitations of this study**

12

- 13 • Large-scale, long-term (12 year) follow-up data sets, representing the Korean  
14 population, were analyzed. The inpatient and outpatient costs of spontaneous  
15 pneumothorax treatment were calculated.  
16
- 17 • Data on detailed medical-service use were recorded and analyzed, such as medication,  
18 procedures, surgery undertaken due to spontaneous pneumothorax.  
19
- 20 • Due to a lack of relevant information in the claims data, for example, medical  
21 treatments are not necessarily covered by insurance, not all relevant treatments data  
22 could be considered.  
23
- 24 • This study could not distinguish whether medical service use was due to new  
25 occurrences or follow-up of existing spontaneous pneumothorax.  
26  
27  
28  
29  
30  
31  
32  
33  
34  
35  
36  
37  
38  
39  
40  
41  
42  
43  
44  
45  
46  
47  
48  
49  
50  
51  
52  
53  
54  
55  
56  
57  
58  
59  
60

## Introduction

The pulmonary system is important because it plays a crucial role in oxygenation of the blood.[1] In pneumothorax, air or gas pools in the inter-pleural cavity,[2] leading to lung collapse and impaired pulmonary function.[3] Pneumothorax is categorized into spontaneous pneumothorax (SP) or traumatic pneumothorax, depending on etiology, and SP is subcategorized into primary spontaneous pneumothorax (PSP), occurring in the absence of underlying lung-related comorbidities, and secondary spontaneous pneumothorax (SSP), occurring in the presence of underlying lung-related comorbidities.[4]

The prevalence rate of SP reportedly ranges from 1.2 to 9.8/100,000 in women to 7.4 to 24/100,000 in men; the prevalence rate of hospitalized SP is about 17 to 22/100,000 in men, 6 to 7/100,000 in women, and 14 to 23/100,000 overall.[5-9] Although SP has a relatively low prevalence rate, it is clinically important,[10] as relapse rates are high (20–40%, depending on duration)[7, 11, 12] and hospitalization is often required, influencing the work productivity of patients.

However, there is a paucity of research on SP.[13] Given its low prevalence rate, large-scale research at a national scale is needed to evaluate the epidemiology of SP. Although large-scale studies have been performed in the UK, France, and Germany, these have provided limited epidemiological information.[6-8]

Thus, we aimed to determine the prevalence rate of SP and medical service use by the affected patients, according to sociodemographic characteristics, by implementing the National Sample Cohort data from the National Health Insurance Service (NHIS) of Korea, to gain a more accurate understanding of the prevalence, treatment and management of SP in Korea.

## Methods

### Patient and Public Involvement

The National Health Insurance (NHI) system in Korea is a single-payer system to which 98% of citizens belong. Under this system, a medical provider requests reimbursement from a third-person payer (the NHIS) when a patient uses a medical service.[14] [15] The NHIS-NSC is a population-based cohort built by the NHIS. In 2002, a cohort was extracted by systematic stratified random sampling from a pool of 47,851,928 individuals, excluding those who were not enrolled in the NHI (income level of 0) and foreigners.[16] The cohort comprises 1,476 levels, based on sex, age, and income. Finally, 2.2% of this pool (1,025,340 individuals) were extracted and data from newborns were added each year to maintain the sample size[16]. Based on NHIS Sample Cohort (NHIS-NSC) data (for the period 2002–2013), we included only 4,658 patients diagnosed with SP in the 12 years between January 2002 and December 2013. SP patients were defined as those who used a medical service at least once for main or secondary diseases of ICD-10 J93.0 (Spontaneous tension pneumothorax), J93.1 (Other spontaneous pneumothorax), J93.8 (Other pneumothorax), or J93.9 (Pneumothorax, unspecified).

### Main descriptive variables

#### Prevalence rate of SP

For each year, the frequency per 100,000 and the frequency of patients who used medical services at least once for SP as the major or secondary diagnosis were determined. Sociodemographic characteristics are shown by sex, age, income level, and insurance type. Based on previous studies,[6, 8] age was subdivided as follows: < 15, 15–34, 35–64, and ≥ 65 years. Income level was divided into low (0, 1, 2, or 3 out of 0–10), medium (4, 5, 6, or 7), or high (8, 9, or 10). Insurance type was divided into region-based enrollee, job-based enrollee, and medical assistance recipient. For each year, the prevalence of SP per 100,000 and the frequency of patients who were hospitalized due to SP were analyzed. Patients who used hospitalization services at least once were counted; two or more hospitalizations were not counted more than once. The hospitalization rate among pneumothorax patients was

1  
2  
3  
4 calculated using the same standards: the denominator was the number of patients who used  
5 medical services at least once due to SP in a given year, by sex and age, and the numerator  
6 was the number of patients who used hospitalization services at least once.  
7  
8  
9

### 10 **Hospitalization of SP patients by year**

11  
12  
13 Frequency of rehospitalization due to SP is shown by time period. The ratios of the total  
14 rehospitalization number to rehospitalization in a specific time period are also shown. The  
15 number of rehospitalizations counted all hospitalizations (other than the first-time) and  
16 allowed for duplication within each patient. To calculate the number of hospitalizations per  
17 person, the average, standard deviation (SD), minimum and maximum number of  
18 hospitalizations per time period were calculated. For the number of hospitalizations per  
19 person, first-time hospitalizations were also included. The interval between hospitalizations  
20 was calculated as the interval between the dates of two admissions.  
21  
22  
23  
24  
25  
26

### 27 **Comorbidities in SP patients**

28  
29 Diseases were counted as comorbidities if they were diagnosed as the major or secondary  
30 disease within 1 year of the first date of SP onset. The number of patients who were given  
31 codes for frequent comorbidities, i.e., chronic obstructive pulmonary disease (COPD),  
32 pneumonia, interstitial lung disease, lung cancer, asthma and lung abscess, were counted;  
33 patients with multiple comorbid conditions were counted more than once.[8, 17] The  
34 Charlson Comorbidity Index (CCI) was categorized into normal and CCI 0, 1, 2, and  $\geq 3$ [18-  
35 20] The International Statistical Classification of Disease and Related Health Problems, 10<sup>th</sup>  
36 revision(ICD-10) codes of comorbidities are shown in Supplemental Table 1.  
37  
38  
39  
40  
41  
42  
43

### 44 **Treatment period and medical costs of SP patients**

45  
46 The total number of follow-ups within 60 days after medical service use due to new SP onset,  
47 the number of follow-ups that occurred within a specified duration, and the comparative ratio  
48 of follow-ups within 60 days were analyzed. The mean, minimum, and maximum number of  
49 follow-ups, including the first medical service use, were analyzed. For hospitalization service  
50 users, the follow-up duration was calculated based on the date of discharge. The number of  
51 follow-ups in a specified period after discharge and the average number of follow-ups are  
52  
53  
54  
55  
56  
57



1  
2  
3  
4 shown. Additionally, the average follow-up duration and average medical costs for each new  
5 SP onset were also calculated, as was the average length of hospitalization for patients. Given  
6 that we analyzed administrative data, it was necessary to distinguish between medical service  
7 use due to new SP onset and that due to follow-up. Based on previous research indicating that  
8 air leaks from SP generally stop within approximately 15 days and that X-ray follow-up is  
9 recommended 2–4 weeks after discharge,[7, 21] we set the SP follow-up duration as 60 days  
10 and defined new SP onset as cases in which no medical service use (due to SP) was recorded  
11 in the previous 60 days. When one patient experienced multiple new occurrences of SP,  
12 repeated counting was allowed.  
13  
14  
15  
16  
17  
18  
19

20 The medical costs of SP patients included the average medical cost per person. Medical costs  
21 determined to be eligible for reimbursement by HIRA out of treatment costs were indicated in  
22 the submitted insurance claim statement. Medical costs are the sum of benefits reimbursed by  
23 the insurer (Korean National Health Insurance Service) to the medical care institutions and  
24 self-payment costs paid by the beneficiary (patient). Each patient's medical costs were  
25 calculated as the sum of costs listed on their claims. The average medical costs were the  
26 amount of total medical expenses for one year divided by the number of patients. Due to a  
27 lack of relevant information in the claims data, the costs did not uncover items non-  
28 reimbursable items such as traditional drugs and indirect medical costs such as transportation  
29 costs and lost productivity. If uncovered items or indirect medical costs which did not contain  
30 medical services provided under the NHI were included, the medical costs of SP patients  
31 might be higher than that of this study.  
32  
33  
34  
35  
36  
37  
38  
39  
40  
41

### 42 **Treatment and medication for SP patients**

43  
44

45 In terms of treatment for SP patients, the most frequent treatment of the code that corresponds  
46 to the "Procedure/surgery" category in the statement listing SP as the major or secondary  
47 diagnosis was given. All statements prescribing the corresponding treatment were counted  
48 and duplication of treatments and patients were allowed. Treatments were categorized as non-  
49 surgical treatments and surgical treatments. Percentages were calculated by having the  
50 denominator as codes that correspond to the "Procedure/surgery" category, excluding costs of  
51 materials, drugs used during treatment and list of tests. For medication, the most frequent  
52  
53  
54  
55  
56  
57  
58  
59  
60

1  
2  
3  
4 treatment of the code that corresponds to the “Medication” category in the diagnostic  
5 statement was given. Among frequently prescribed drugs, digestants were excluded. Similar  
6 to “Procedure/surgery”, all statements that prescribe the corresponding drug were counted  
7 and drug and patient duplication was allowed. Medication data were limited to cases of  
8 inpatient prescription, while outpatient prescriptions were excluded. Based on the 5<sup>th</sup>  
9 Anatomical Therapeutic Chemical (ATC) Classification System level,[22-24] notation of the  
10 medication taken was indicated by the 5-step code of the chemical name and the three drugs  
11 that did not undergo the 5-step classification were indicated by their ingredients.  
12  
13  
14  
15  
16  
17  
18

### 19 **Statistical analysis**

20  
21 The total annual prevalence rate of SP and that of hospitalization due to SP are shown in  
22 frequency and frequency per 100,000 people. It was calculated by dividing the corresponding  
23 frequency by the total population that fits in the corresponding range and multiplying by  
24 100,000. Categorical variables, such as the sociodemographic characteristics, number of  
25 rehospitalizations per period, comorbidities, CCI level, and follow-up frequency per period,  
26 treatment and drugs for the total number of SP patients for 12 years, are shown as frequencies  
27 and percentages. Continuous variables, such as number of hospitalizations, CCI value, total  
28 follow-up frequency, length of hospitalization in days and medical costs, are reflected by  
29 calculating the average, SD, minimum, and maximum values. Analyses were conducted using  
30 the statistical package SAS version 9.4 (SAS Institute Inc., Cary, NC).  
31  
32  
33  
34  
35  
36  
37  
38  
39  
40  
41  
42  
43  
44  
45  
46  
47  
48  
49  
50  
51  
52  
53  
54  
55  
56  
57  
58  
59  
60

---

## Results

### Sociodemographic characteristics of SP patients

The sociodemographic characteristics of SP patients are shown in Table 1. During 2002 to 2013, 4,658 patients used medical services for SP as their major or secondary diagnosis, at least once. The male-to-female ratio was about 4.4:1. Most patients were 15–34-year-olds, while those below 15-years old were least affected. Most were in the high-income group, while the low-income group utilized medical services the least. Job-based enrollees were the most common category.

Table 1. Sociodemographic characteristics of spontaneous pneumothorax patients

|                                       | N     | %*   |
|---------------------------------------|-------|------|
| Total number of pneumothorax patients | 4,658 |      |
| Sex                                   |       |      |
| Male                                  | 3,796 | 81.5 |
| Female                                | 862   | 18.5 |
| Age (years)                           |       |      |
| < 15                                  | 123   | 2.6  |
| 15–34                                 | 2,407 | 51.7 |
| 35–64                                 | 1,374 | 29.5 |
| ≥ 65                                  | 754   | 16.2 |
| Income range                          |       |      |
| Low (0–3)                             | 1,037 | 22.3 |
| Medium (4–7)                          | 1,725 | 37.0 |
| High (8–10)                           | 1,896 | 40.7 |
| Insurance type                        |       |      |
| Region                                | 1,741 | 37.4 |
| Job                                   | 2,804 | 60.2 |

|                    |     |     |
|--------------------|-----|-----|
| Medical Assistance | 113 | 2.4 |
|--------------------|-----|-----|

---

\*% =  $N / 4,658 \times 100$

### Prevalence rate of SP

The annual prevalence rate of SP (SP patients per 100,000 people) by sex ranged from 39 to 66 per 100,000, depending on the year (Fig. 1). The prevalence rate of SP consistently increased from 2002 to 2011 and decreased slightly thereafter. Among males, the rate was 63 per 100,000 in 2002, and then increased consistently to 109 per 100,000 in 2011. Thereafter, it decreased slightly, but the rate still exceeded 100 per 100,000 in 2012 and 2013. Among females, the rate was 15 per 100,000 in 2002, and remained essentially constant at 15–18 per 100,000, except for an increase to 23 per 100,000 in 2011. The male-to-female ratio slowly increased from 4.2:1 in 2002, to a ratio of 6.5:1 in 2010.

In all years, except 2002, the SP prevalence rate was the highest in the 15–34-year-old group, followed by the  $\geq 65$ -year-old, 34–64-year-old, and  $< 15$ -year-old groups (Fig. 2). The prevalence rate for those in the 15–34-year-old group was 64.8 per 100,000 in 2002, which then increased to 133.2 per 100,000 in 2009. The rate in the  $\geq 65$ -year-olds also increased, from 69.1 per 100,000 in 2002 to 93.5 per 100,000 in 2013.

The prevalence rate of SP by sex, age, income level, and insurance type are summarized in Supplementary Table 2. To examine the detailed distribution by age, age groups were further subdivided into 5-year increments. The prevalence rate tended to be the highest at 15–19 years, decreased to 40–49 years, and then peaked again at 65–74 years before decreasing again. The prevalence rate was slightly higher in the high-income group, but remained low among medical-assistance recipients, although this rate increased after 2011 to a rate higher than that of health insurance enrollees.

The prevalence rates of SP patients who were hospitalized are shown in Figs. 3 and 4. The rate of hospitalization was 18.3 per 100,000 individuals in 2002, increasing to 36.2 per 100,000 at 2011 before decreasing in 2012. The rate of hospitalization in men was 31.4 per 100,000 in 2002, which increased to 61.0 per 100,000 in 2011. Among women, the

1  
2  
3  
4 hospitalization rate was 5.3 per 100,000 in 2002, and 11.3 per 100,000 in 2011. This rate  
5 decreased for both sexes in 2012. The rate tended to increase up to 2012 for men, but there  
6 was no consistent trend for females. The male-to-female ratio of hospitalization was 6:1 on  
7 average. By age, hospitalization in the 15–34-year age group was the highest at 33–75 per  
8 100,000, followed by the  $\geq 65$ -year-old group and the 35–64-year-old group. The rate was  
9 the lowest for the  $< 15$ -year-old group, at 1–3 per 100,000. The prevalence of hospitalized SP  
10 patients among the total population, by age and sex, are shown in Supplementary Table 3.  
11  
12  
13  
14  
15  
16

### 17 **Hospitalization of SP patients by year**

18  
19  
20 Within the SP patient sample, the proportion of those receiving hospital treatment was  
21 defined as the hospitalization treatment rate. The number of patients who used the  
22 hospitalization service for SP in 2002 was 188(47.2%) (Table 2). The rate of hospitalization  
23 treatment slowly increased thereafter up to 2010 and then decreased slightly. No sex-related  
24 differences in hospitalization treatment rates were observed. However, for age-related  
25 differences, the  $\geq 65$ -year-old group had the highest hospitalization treatment rate, while the  
26  $< 15$ -year-old group had the lowest rate.  
27  
28  
29  
30  
31  
32  
33

34 The frequency and proportion of rehospitalization of SP patients is shown in Supplementary  
35 Table 4. In total, 3,005 patients used hospital services at least once due to SP between 2002  
36 and 2013. Among these, 1,683 were rehospitalized, with 60.7% of all rehospitalizations  
37 occurring within 6 months and 71.4% within 1 year. The average number of hospitalizations  
38 per person overall was 1.56, at an average interval of 223.07 days.  
39  
40  
41  
42  
43  
44  
45  
46  
47  
48  
49  
50  
51  
52  
53  
54  
55  
56  
57  
58  
59  
60

---

Table 2. Rate of hospitalization treatment for spontaneous pneumothorax patients

|      | Total number of hospitalized patients | Sex  |                           |        |                           |      |                           | Age (years) |                           |     |                           |    |      |    |      |
|------|---------------------------------------|------|---------------------------|--------|---------------------------|------|---------------------------|-------------|---------------------------|-----|---------------------------|----|------|----|------|
|      |                                       | Male |                           | Female |                           | < 15 | 15–34                     | 35–64       | ≥ 65                      |     |                           |    |      |    |      |
|      |                                       | N    | Hospitalization rate (%)* | N      | Hospitalization rate (%)* | N    | Hospitalization rate (%)* | N           | Hospitalization rate (%)* | N   | Hospitalization rate (%)* |    |      |    |      |
| 2002 | 398                                   | 188  | 47.2                      | 161    | 50.0                      | 27   | 35.5                      | 4           | 36.4                      | 111 | 53.1                      | 43 | 35.0 | 30 | 54.5 |
| 2003 | 490                                   | 236  | 48.2                      | 202    | 50.0                      | 34   | 39.5                      | 2           | 33.3                      | 135 | 49.1                      | 62 | 42.2 | 37 | 59.7 |
| 2004 | 504                                   | 262  | 52.0                      | 217    | 52.7                      | 45   | 48.9                      | 9           | 40.9                      | 151 | 54.7                      | 56 | 42.7 | 46 | 61.3 |

1  
2  
3  
4  
5  
6  
7  
8  
9  
10  
11  
12  
13  
14  
15  
16  
17  
18  
19  
20  
21  
22  
23  
24  
25  
26  
27  
28  
29  
30  
31  
32  
33  
34  
35  
36  
37  
38  
39  
40  
41  
42  
43  
44  
45  
46

|      |     |     |      |     |      |    |      |   |      |     |      |    |      |    |      |
|------|-----|-----|------|-----|------|----|------|---|------|-----|------|----|------|----|------|
| 2005 | 514 | 276 | 53.7 | 235 | 55.7 | 41 | 44.6 | 3 | 33.3 | 161 | 59.2 | 74 | 45.7 | 38 | 53.5 |
| 2006 | 518 | 281 | 54.2 | 241 | 56.8 | 40 | 42.6 | 2 | 16.7 | 156 | 54.7 | 66 | 47.5 | 57 | 69.5 |
| 2007 | 555 | 286 | 51.5 | 244 | 51.8 | 42 | 50.0 | 4 | 36.4 | 169 | 56.3 | 73 | 44.2 | 40 | 50.6 |
| 2008 | 557 | 296 | 53.1 | 270 | 57.0 | 26 | 31.3 | 3 | 27.3 | 183 | 57.7 | 62 | 39.7 | 48 | 65.8 |
| 2009 | 610 | 327 | 53.6 | 279 | 53.8 | 48 | 52.7 | 4 | 36.4 | 215 | 58.0 | 59 | 41.3 | 49 | 57.6 |
| 2010 | 598 | 342 | 57.2 | 306 | 59.1 | 36 | 45.0 | 3 | 21.4 | 196 | 59.4 | 89 | 50.6 | 54 | 69.2 |
| 2011 | 661 | 364 | 55.1 | 307 | 56.1 | 57 | 50.0 | 3 | 25.0 | 208 | 57.1 | 82 | 45.8 | 71 | 67.0 |
| 2012 | 623 | 338 | 54.3 | 285 | 53.6 | 53 | 58.2 | 4 | 36.4 | 184 | 52.9 | 83 | 50.3 | 67 | 67.7 |
| 2013 | 616 | 338 | 54.9 | 291 | 55.5 | 47 | 51.1 | 4 | 30.8 | 175 | 55.4 | 86 | 51.5 | 73 | 60.8 |

\* Hospitalization rate (%) = N / total number of spontaneous pneumothorax patients × 100

## Comorbidities in SP patients

Lung-related comorbidities in SP patients by age are shown in Table 3. For the < 15-year-old group, there were no particular comorbidities. COPD was the most common comorbidity, followed by pneumonia and asthma.

Table 3. Comorbidities of spontaneous pneumothorax patients

|              | 15–34        |      | 35–64        |      | ≥ 65       |      | Total        |      |
|--------------|--------------|------|--------------|------|------------|------|--------------|------|
|              | years        |      | years        |      | years      |      |              |      |
|              | N            | %*   | N            | %†   | N          | %‡   | N            | %§   |
| <b>Total</b> | <b>2,407</b> |      | <b>1,374</b> |      | <b>497</b> |      | <b>4,658</b> |      |
| COPD         | 273          | 11.3 | 277          | 20.2 | 287        | 57.7 | 837          | 18.0 |
| Pneumonia    | 102          | 4.2  | 109          | 7.9  | 150        | 30.2 | 361          | 7.8  |
| Interstitial | 4            | 0.2  | 17           | 1.2  | 13         | 2.6  | 34           | 0.7  |
| Lung cancer  | 11           | 0.5  | 72           | 5.2  | 67         | 13.5 | 150          | 3.2  |
| Asthma       | 63           | 2.6  | 111          | 8.1  | 174        | 35.0 | 348          | 7.5  |
| Lung abscess | 1            | 0.0  | 8            | 0.6  | 0          | 0.0  | 9            | 0.2  |
| CCI          |              |      |              |      |            |      |              |      |
| Mean         | 0.25         |      | 0.69         |      | 1.31       |      | 0.47         |      |
| 0            | 1,823        | 75.7 | 708          | 51.5 | 173        | 34.8 | 2,704        | 58.1 |
| 1            | 468          | 19.4 | 420          | 30.6 | 305        | 61.4 | 1,193        | 25.6 |
| 2            | 45           | 1.9  | 165          | 12.0 | 166        | 33.4 | 376          | 8.1  |
| 3 or more    | 5            | 0.2  | 65           | 4.7  | 99         | 19.9 | 159          | 3.4  |

\* % =  $N / 2,407 \times 100$

† % =  $N / 1,374 \times 100$

‡ % =  $N / 496 \times 100$

§ % =  $N / 4658 \times 100$

COPD, Chronic Obstructive Pulmonary Disease; CCI, Charlson Comorbidity Index



1  
2  
3  
4 COPD was more common in the  $\geq 65$ -year-old group than in the younger age groups. Fewer  
5  
6 patients among the 15–34-year-old group had asthma than pneumonia. The prevalence of all  
7  
8 comorbidities other than lung abscess was the highest in the  $\geq 65$ -year-old group. The lung cancer  
9  
10 rate was lower in the 15–34-year-old and 35–64-year-old groups than in the  $\geq 65$ -year-old group.

11  
12 The average CCI value of SP patients was 0.47 and increased with increasing age. The number of  
13  
14 patients with a CCI value of 0 decreased with increasing age, while that of patients with a CCI value  
15  
16 of  $\geq 3$  increased with increasing age.

### 17 18 19 **Treatment period and medical costs of SP patients**

20  
21 There were 4,157 outpatient service users among patients with first-time SP (no use of medical  
22  
23 service for SP for 60 days prior) from 2002 to 2013 (Table 4). Among these, 3,035 required follow-  
24  
25 up within 60 days of the first onset of SP. Most follow-ups occurred within 30 days. The average  
26  
27 number of follow-ups in each time period including the first-time visit was found to be 1.14 days  
28  
29 within 7 days, 1.33 days within 14 days, 1.54 days within 30 days, and 1.73 days within 60 days. The  
30  
31 average length of time between follow-ups was 11.07 days and the average medical cost per person  
32  
33 was \$94.5 (106,766 KRW).

---

Table 4. Outpatient or inpatient treatment period and medical costs of spontaneous pneumothorax

|                                | Follow-up frequency during period | Total follow-up frequency (Including first visit) |                                                              |       |     |         |     |
|--------------------------------|-----------------------------------|---------------------------------------------------|--------------------------------------------------------------|-------|-----|---------|-----|
|                                |                                   | Cumulative frequency                              | Total follow-up frequency (Within 60 days) Comparative ratio | Mean  | SD  | min     | max |
| Outpatient and follow-up       |                                   |                                                   |                                                              |       |     |         |     |
| First-time outpatient use      | 4,157                             |                                                   |                                                              |       |     |         |     |
| Within 7 days                  | 582                               | 19.2                                              | 1.14                                                         | 0.42  | 1   | 6       |     |
| Within 14 days                 | 1,372                             | 45.2                                              | 1.33                                                         | 0.63  | 1   | 8       |     |
| Within 30 days                 | 2,245                             | 74.0                                              | 1.54                                                         | 0.84  | 1   | 13      |     |
| Within 60 days                 | 3,035                             | 100.0                                             | 1.73                                                         | 1.07  | 1   | 13      |     |
| Average follow-up period       |                                   |                                                   | 11.07                                                        | 16.55 | 0   | 60      |     |
| Average medical costs (US \$)* |                                   |                                                   | 94.5                                                         | 141.5 | 0.9 | 2,673.6 |     |

1  
2  
3  
4  
5  
6  
7  
8  
9  
10  
11  
12  
13  
14  
15  
16  
17  
18  
19  
20  
21  
22  
23  
24  
25  
26  
27  
28  
29  
30  
31  
32  
33  
34  
35  
36  
37  
38  
39  
40  
41  
42  
43  
44  
45  
46

---

Hospitalization and follow-up

---

|                                           |       |       |         |         |      |          |  |
|-------------------------------------------|-------|-------|---------|---------|------|----------|--|
| First-time hospitalization use            | 3,005 |       |         |         |      |          |  |
| Within 7 days                             | 180   | 30.0  | 1.06    | 0.24    | 1    | 3        |  |
| Within 14 days                            | 301   | 50.1  | 1.10    | 0.31    | 1    | 3        |  |
| Within 30 days                            | 451   | 75.0  | 1.15    | 0.40    | 1    | 5        |  |
| Within 60 days                            | 601   | 100.0 | 1.20    | 0.48    | 1    | 7        |  |
| Average number of days of hospitalization |       |       | 14.19   | 18.25   | 0    | 601      |  |
| Average follow-up period                  |       |       | 3.67    | 10.67   | 0    | 60       |  |
| Average medical costs (US \$)*            |       |       | 2,523.0 | 2,692.2 | 45.9 | 48,967.3 |  |

---

\*The cost of items determined to be eligible for reimbursement by the HIRA (Health Insurance Review and Assessment Service) out of the total treatment amount were indicated in the submitted insurance claim statement. It was converted from Korean Won to US dollar, according to the exchange rate on October 12, 2018 (US \$1.00 = Korean 1,130 Won).

1  
2  
3  
4 The number of hospitalizations for first cases of SP was 3,005, of which 601 required follow-up  
5 within 60 days of discharge. Most follow-ups occurred within 30 days and the proportion of  
6 follow-ups occurring in the first week was higher for in-patients than for outpatient service users.  
7  
8 The average number of follow-ups was lower for inpatients than for outpatient service users. The  
9 average length of hospitalization was 14.19 days. The average follow-up period after discharge  
10 was 3.67 days and the average medical costs for each hospitalization was markedly higher than  
11 those of outpatients.  
12  
13  
14  
15  
16  
17  
18  
19

### 20 **Treatment and medication for SP patients**

21  
22 Treatment and medication details are shown in Table 5. The most commonly received non-  
23 surgical treatment for SP patients was oxygen inhalation, followed by suction drainage or  
24 tracheostomy suction. Thoracostomy was the most common surgical treatment, followed by lung  
25 wedge resection. The frequency of other surgical treatments was low.  
26  
27  
28  
29

30 Medication commonly prescribed for SP could be categorized into analgesics, antitussives, and  
31 antibiotics, when excluding digestives. Among analgesics, paracetamol, codeine combinations,  
32 excluding psycholeptics and tramadol and paracetamol combinations were prescribed at similar  
33 rates. Among antitussives, most were prescribed bromhexine. Among antibiotics, cefixime was  
34 the most frequently prescribed.  
35  
36  
37  
38  
39  
40  
41  
42  
43  
44  
45  
46  
47  
48  
49  
50  
51  
52  
53  
54  
55  
56  
57  
58  
59  
60

---

Table 5. Treatments and drugs used for spontaneous pneumothorax patients

|                                                | Treatment     |      | Drugs                                         |           |
|------------------------------------------------|---------------|------|-----------------------------------------------|-----------|
|                                                | N             | %*   | N                                             | %†        |
| Total count of prescription statements         | <b>21,107</b> |      | <b>37,488</b>                                 |           |
| <b>Non-surgical treatments</b>                 |               |      | <b>Analgesics</b>                             |           |
| Oxygen Inhalation                              | 4,351         | 20.6 | Paracetamol                                   | 1,039 2.8 |
| Nebulizer Treatment Of Lower Airway            | 534           | 2.5  | Codeine, combinations excluding psycholeptics | 878 2.3   |
| Suction Drainage Or Tracheostomy Suction, Etc. | 2,481         | 11.8 | Tramadol and paracetamol                      | 832 2.2   |
| Tracheal Intubation                            | 81            | 0.4  | Propionic acid-derivatives                    | 784 2.1   |
| <b>Surgical treatments</b>                     |               |      | Aceclofenac                                   | 455 1.2   |
| Thoracostomy                                   | 3,132         | 14.8 | <b>Antitussives</b>                           |           |
| Wedge Resection Of Lung                        | 1,304         | 6.2  | Acetylcysteine                                | 672 1.8   |
| Resection Of Bullae                            | 125           | 0.6  | Xanthines                                     | 635 1.7   |
| Pleurodesis                                    | 27            | 0.1  | Bromhexine                                    | 789 2.1   |
| Apicolysis, Pleurolysis                        | 15            | 0.1  | Ambroxol                                      | 553 1.5   |
| Lobectomy Of Lung                              | 13            | 0.1  | <b>Antibiotics</b>                            |           |
| Pleurectomy                                    | 12            | 0.1  | Cefixime                                      | 374 1.0   |
| Segmentectomy Of Lung                          | 10            | 0.0  | Third-generation cephalosporins               | 305 0.8   |
| Pleural Decortication                          | 8             | 0.0  |                                               |           |
| Primary Thoracoplasty                          | 4             | 0.0  |                                               |           |

\*% = N / 21,107

†% = N / 37,488

## Discussion

In this large cohort study in Korea, the annual prevalence rate of spontaneous pneumothorax (SP) was 39–66 per 100,000. These numbers are slightly higher than those previously reported: 1.2–7.4 per 100,000 in Minnesota [5] and 9.8–24 per 100,000 in United Kingdom.[6] The reason for these differences may be because SP was defined as cases in which medical service was used for SP, which could include follow-up appointments, rather than counting the strict number of incidents. In contrast, the prevalence rate of hospitalization due to SP was 18–36 per 100,000 overall. These rates were previously reported as 14.3–22.7 per 100,000 overall [7, 8], which are similar to those found in our study. It may be because of hospitalization being a result of new incidents only.

The prevalence rate was much higher for males than in previous studies. The male-to-female ratio for all SP and for hospitalized SP were higher than that reported previously (2.4:1–3.3:1) [6, 8, 9]. In terms of age, the prevalence rate was the highest for the 15–34-year-old group, particularly for the 15–19-year-old group, followed by the  $\geq 65$ -year-old, 35–64-year-old, and  $< 15$ -year-old group, respectively. Previous studies showed a peak-age for SP at 20, followed by a later peak at 70 [8, 25]. Overall, the incidence of SP is higher in Korea, particularly in males and at a slightly earlier age (15–19 years) than in other countries: e.g., 20–25 years in France [7] and Germany,[8] and 20–24 years or 30–34 years in England.[6] The prevalence of SP in males increased until 2012, while there was no clear trend in females. As there have been no previous large-scale research in Eastern countries, we cannot conclude whether these results are due to ethnicity or environment.

SP has a high rate of hospitalization;[26] 47–57% of SP patients in our study received hospital treatment. There were no marked differences due to sex, although the female hospitalization rate was slightly lower. The hospitalization rate was highest in the  $\geq 65$ -year-old group and lowest in the  $< 15$ -year-old group. The necessity of hospitalization for SP is debated. Hallifax and Rahman stated in 2015 that outpatient treatment is sufficient for patients who are young, have no comorbidities and have stable vital signs; however, the evidence of outpatient treatment stability is lacking.[10]

1  
2  
3  
4 SP has a high rate of relapse;[22, 27, 28] with 1,683 of 3,003 first-time hospitalization cases  
5 requiring rehospitalization in our study. Although previous studies have shown that the relapse  
6 rate of SP is 15–40%,[7, 11, 12, 29] these studies were based on small sample sizes (82–273  
7 subjects). The risk factors for SP relapse are controversial; some studies indicate that elderly  
8 people and women are at higher risk,[7, 30] while other studies indicate that age and sex have no  
9 significant effect.[31] Furthermore, low BMI [12, 32], non-surgical treatment and smoking  
10 habits [12, 31] have been implicated in SP, yet further study is required to delineate the risk  
11 factors.  
12

13  
14  
15  
16  
17  
18  
19 SP can involve lung-related comorbidities.[33, 34] To distinguish between PSP and SSP, it is  
20 important to evaluate comorbidities. This distinction is important, as these conditions have  
21 different characteristics and prognoses;[21, 35] however, categorizing these conditions based on  
22 administrative data remains challenging,[17] because there are no codes to differentiate between  
23 PSP and SSP in the ICD categorizations. Nevertheless, our objective was describe details related  
24 to SP; thus, we examined the current comorbidity status, rather than attempting to categorize SP  
25 patients. Among comorbidities, COPD was the most common in all age groups. With increasing  
26 age, the proportion of patients with comorbidities increased; thus, with increasing age, SSP was  
27 more common than PSP. Therefore, the decrease in SP risk with age, followed by an increase,  
28 may be due to an increase in SSP in particular.  
29

30  
31  
32  
33  
34  
35  
36  
37 The approximate treatment period for SP was 11 days for outpatients and 17.7 days for  
38 hospitalized patients. The average number of follow-ups within 60 days was 1.73. Thus, many  
39 cases of SP are minor and a single outpatient visit is necessary to complete the treatment. For  
40 both hospitalization and outpatient service users, 75% of total follow-ups occurred within 1  
41 month; hence, the follow-up duration for SP is short. Few studies have assessed the treatment or  
42 follow-up duration for SP, yet our results are similar to a previous study reporting a remission  
43 period of 7–15 days for SP,[21, 36]. X-ray follow-up is recommended within 2–4 weeks of  
44 discharge [35] and the median value of length of stay (LOS) is 6–7 days.[7, 30] No previous  
45 studies have reported the socioeconomic costs due to SP; in our study, we found an average  
46 medical cost of \$94.50 per person for outpatient services and of \$2,523.00 per person for  
47 hospitalization. The maximum costs were \$2,673.60 per person for outpatient and \$48,967.30  
48 per person for hospitalization.  
49  
50  
51  
52  
53  
54  
55  
56

1  
2  
3  
4 For treatment, surgery, and medication for SP patients, we reported the frequency of  
5 prescriptions rather than the number of people. Oxygen inhalation among non-surgical  
6 treatments and thoracostomy among surgical treatments were the most common procedures. A  
7  
8 previous study has also shown that the most common treatment for SP patients is thoracostomy  
9 (92% of patients).[29] The surgery most commonly performed after thoracostomy is lung wedge  
10 resection; this involves removing a portion of the lung and is less invasive, preserves more lung  
11 function, and has fewer side-effects than lobar resection.[38, 39] For medication; analgesics,  
12 antitussives, and antibiotics were the most frequently prescribed, after excluding digestants. For  
13 convenience of analysis, we excluded outpatient prescriptions. Considering that the rate of  
14 hospitalization exceeded 60% for SP patients, prescription patterns are not likely to differ  
15 markedly between hospitalized and overall cases.  
16  
17

18  
19  
20  
21  
22  
23  
24 This study has several limitations. First, we could not distinguish between PSP, SSP, and  
25 iatrogenic pneumothorax; further research is needed on the epidemiology and medical service  
26 use of each SP category. Second, our results should be interpreted with caution, as we could not  
27 ascertain whether medical service use was due to new incidents of SP or to follow-up. Although  
28 we attempted to select medical service use due to new incidents of SP by using an operational  
29 definition, based on previous reports, this may not be accurate. Third, our study may be limited  
30 by the lack of data on uncovered items and general medicinal products in the treatment history  
31 records of SP patients. Lastly, as the diagnosis codes in claim data that was the basis for identifying the  
32 patients may not completely accurate[40], it is not sure that all patients with SP were listed under the  
33 corresponding diagnosis codes. However, despite these limitations, this study provided a detailed  
34 record of the epidemiology and treatment of SP. Our study is significant in that it provides novel  
35 information, contributing to an understanding of SP, a little-understood condition with an  
36 increasing prevalence in Korea.  
37  
38  
39  
40  
41  
42  
43  
44  
45  
46

## 47 **Conclusion**

48  
49  
50 This study demonstrated the increasing prevalence of SP, higher prevalence of SP in men, and  
51 earlier peak age of SP patients in Korea, and defined the medical service use characteristics of  
52 patients with SP in Korea. These findings can contribute to the understanding of SP.  
53  
54  
55  
56  
57  
58  
59  
60



## **Acknowledgements**

The authors thank Kyungwon Kang, who conducted data cleaning and initial analyses.

## **Author contributions**

IHH and BYJ contributed to the overall conception and design of the study protocol. BJ and DK contributed to the specific study design and data analysis. DK wrote the first draft of the manuscript. All authors contributed to interpretation of the analyses and revisions of the final manuscript. All authors gave final approval of the version to be submitted.

## **Funding statement**

This research received no specific grant from any funding agency in the public, commercial or not-for-profit sectors.

## **Competing interest**

No competing interests to declare.

## **Ethics approval**

The study was approved by the Institutional Review Board of Jaseng Hospital of Korean Medicine in Seoul, Korea (JASENG 2018-09-007).

## **Data sharing statement**

The datasets generated and analyzed during the current study are available on the National Health Insurance Sharing Service. NHIS provides support to research activities in various sectors of society, the economy, environment, industry, etc., as well as policy and academic research on the health sector by providing sample cohort databases. The research database consists of five types of databases: a sample cohort database, medical check-up cohort database, elderly cohort database, working women cohort database, and infant medical check-up cohort database. Each

1  
2  
3  
4 cohort database consists of the following four detailed data-sets: qualification database, treatment  
5  
6 database, medical check-up database, and clinic database.  
7  
8

9  
10 The present study utilized the sample cohort database, which is third-party data not owned by the  
11  
12 authors. The sample cohort database is available upon approval for data sharing, from the health  
13  
14 insurance corporation. For the purpose of policy and academic research a fee is paid to obtain  
15  
16 data from the NHIS website [<https://nhiss.nhis.or.kr/bd/ab/bdaba022eng.do>].  
17  
18  
19  
20  
21  
22  
23  
24  
25  
26  
27  
28  
29  
30  
31  
32  
33  
34  
35  
36  
37  
38  
39  
40  
41  
42  
43  
44  
45  
46  
47  
48  
49  
50  
51  
52  
53  
54  
55  
56  
57  
58  
59  
60

## REFERENCES

1. Tortora, G. and N. Anagnostakos, *Principles of Anatomy and Physiology*. 1987: Harper and Row.
2. Luh, S.P., *Review: Diagnosis and treatment of primary spontaneous pneumothorax*. J Zhejiang Univ Sci B, 2010. **11**(10): p. 735-44.
3. Imran, J.B. and A.L. Eastman, *Pneumothorax*. Jama, 2017. **318**(10): p. 974.
4. Sahn, S.A.M.D. and J.E. Heffner, M.D., *spontaneous pneumothorax*. The New England Journal of Medicine, 2000. **342**(12): p. 868-874.
5. Melton, L.J., 3rd, N.G. Hepper, and K.P. Offord, *Incidence of spontaneous pneumothorax in Olmsted County, Minnesota: 1950 to 1974*. Am Rev Respir Dis, 1979. **120**(6): p. 1379-82.
6. Gupta, D., et al., *Epidemiology of pneumothorax in England*. Thorax, 2000. **55**(8): p. 666-71.
7. Bobbio, A., et al., *Epidemiology of spontaneous pneumothorax: gender-related differences*. Thorax, 2015. **70**(7): p. 653-8.
8. Schnell, J., et al., *Spontaneous Pneumothorax Epidemiology and Treatment in Germany Between 2011 and 2015*. Deutsches Arzteblatt International, 2017. **114**(44): p. 739-+.
9. Bense, L., G. Eklund, and L.G. Wiman, *Smoking and the increased risk of contracting spontaneous pneumothorax*. Chest, 1987. **92**(6): p. 1009-12.
10. Hallifax, R.J. and N.M. Rahman, *Epidemiology of pneumothorax--finally something solid out of thin air*. Thorax, 2015. **70**(10): p. 921-2.
11. Saito, Y., et al., *The outcome and risk factors for recurrence and extended hospitalization of secondary spontaneous pneumothorax*. Surg Today, 2018. **48**(3): p. 320-324.
12. Tan, J., et al., *Association Between BMI and Recurrence of Primary Spontaneous Pneumothorax*. World J Surg, 2017. **41**(5): p. 1274-1280.
13. Sousa, I., et al., *Multicentric Genome-Wide Association Study for Primary Spontaneous Pneumothorax*. PLoS One, 2016. **11**(5): p. e0156103.
14. Kwon, S., *Thirty years of national health insurance in South Korea: lessons for achieving universal health care coverage*. Health Policy Plan, 2009. **24**(1): p. 63-71.
15. <http://www.nhis.or.kr/retrieveHomeMain.xx>. Available from: <http://www.nhis.or.kr/retrieveHomeMain.xx>.
16. Lee, J., et al., *Cohort Profile: The National Health Insurance Service-National Sample Cohort (NHIS-NSC), South Korea*. Int J Epidemiol, 2017. **46**(2): p. e15.
17. Frechette, E., et al., *Identifying Primary Spontaneous Pneumothorax from Administrative Databases: A Validation Study*. Can Respir J, 2016. **2016**: p. 1690482.
18. Sundararajan, V., et al., *New ICD-10 version of the Charlson comorbidity index predicted in-hospital mortality*. J Clin Epidemiol, 2004. **57**(12): p. 1288-94.
19. Bannay, A., et al., *The Best Use of the Charlson Comorbidity Index With Electronic Health Care*

- 1  
2  
3  
4  
5  
6  
7  
8  
9  
10  
11  
12  
13  
14  
15  
16  
17  
18  
19  
20  
21  
22  
23  
24  
25  
26  
27  
28  
29  
30  
31  
32  
33  
34  
35  
36  
37  
38  
39  
40  
41  
42  
43  
44  
45  
46  
47  
48  
49  
50  
51  
52  
53  
54  
55  
56  
57  
58  
59  
60
- Database to Predict Mortality*. Med Care, 2016. **54**(2): p. 188-94.
20. Charlson, M., et al., *The Charlson comorbidity index can be used prospectively to identify patients who will incur high future costs*. PLoS One, 2014. **9**(12): p. e112479.
21. MacDuff, A., A. Arnold, and J. Harvey, *Management of spontaneous pneumothorax: British Thoracic Society Pleural Disease Guideline 2010*. Thorax, 2010. **65 Suppl 2**: p. ii18-31.
22. Skrbo, A., B. Begovic, and S. Skrbo, *[Classification of drugs using the ATC system (Anatomic, Therapeutic, Chemical Classification) and the latest changes]*. Med Arh, 2004. **58**(1 Suppl 2): p. 138-41.
23. Janke, A.T., et al., *Access to care issues and the role of EDs in the wake of the Affordable Care Act*. Am J Emerg Med, 2015. **33**(2): p. 181-5.
24. Villani, J. and K. Mortensen, *Nonemergent emergency department use among patients with a usual source of care*. J Am Board Fam Med, 2013. **26**(6): p. 680-91.
25. Nakamura, H., et al., *Epidemiology of spontaneous pneumothorax in women*. Chest, 1986. **89**(3): p. 378-382.
26. 전상훈, et al., *원발성 자연기흉의 치료지침*. The Korean Journal of Thoracic and Cardiovascular Surgery, 2002. **35**(1): p. 43-47.
27. Hallifax, R.J., et al., *Trends in the Incidence and Recurrence of Inpatient-Treated Spontaneous Pneumothorax, 1968-2016*. Jama, 2018. **320**(14): p. 1471-1480.
28. Sadikot, R.T., et al., *Recurrence of primary spontaneous pneumothorax*. Thorax, 1997. **52**(9): p. 805-9.
29. Aghajanzadeh, M., et al., *Data on the epidemiology, diagnosis, and treatment of patients with pneumothorax*. Data Brief, 2018. **20**: p. 1053-1056.
30. Sjostrom, C., G. Stalenheim, and C. Janson, *[Spontaneous pneumothorax--a study of medical records. High age is the most significant risk factor of prolonged length of stay]*. Lakartidningen, 2002. **99**(10): p. 1070-4.
31. Kepka, S., et al., *Primary Spontaneous Pneumothorax Admitted in Emergency Unit: Does First Episode Differ from Recurrence? A Cross-Sectional Study*. Can Respir J, 2017. **2017**: p. 2729548.
32. Huang, T.W., et al., *Contralateral recurrence of primary spontaneous pneumothorax*. Chest, 2007. **132**(4): p. 1146-50.
33. Kwas, H., I. Zendah, and H. Ghedira, *Spontaneous pneumothorax secondary to tuberculosis*. Tunis Med, 2017. **95**(4): p. 276-279.
34. Iga, N., et al., *Clinical features of secondary spontaneous pneumothorax complicated with silicosis*. Respir Investig, 2018. **56**(2): p. 144-149.
35. Onuki, T., et al., *Primary and Secondary Spontaneous Pneumothorax: Prevalence, Clinical Features, and In-Hospital Mortality*. Canadian Respiratory Journal, 2017.

- 1  
2  
3  
4  
5  
6  
7  
8  
9  
10  
11  
12  
13  
14  
15  
16  
17  
18  
19  
20  
21  
22  
23  
24  
25  
26  
27  
28  
29  
30  
31  
32  
33  
34  
35  
36  
37  
38  
39  
40  
41  
42  
43  
44  
45  
46  
47  
48  
49  
50  
51  
52  
53  
54  
55  
56  
57  
58  
59  
60
36. Chee, C.B., et al., *Persistent air-leak in spontaneous pneumothorax--clinical course and outcome*. *Respir Med*, 1998. **92**(5): p. 757-61.
37. Mathur, R., et al., *Time course of resolution of persistent air leak in spontaneous pneumothorax*. *Respir Med*, 1995. **89**(2): p. 129-32.
38. Cao, J., et al., *Survival Rates After Lobectomy, Segmentectomy, and Wedge Resection for Non-Small Cell Lung Cancer*. *Ann Thorac Surg*, 2018. **105**(5): p. 1483-1491.
39. Sihoe, A.D. and P. Van Schil, *Non-small cell lung cancer: when to offer sublobar resection*. *Lung Cancer*, 2014. **86**(2): p. 115-20.
40. Kim, J.A., et al., *Towards Actualizing the Value Potential of Korea Health Insurance Review and Assessment (HIRA) Data as a Resource for Health Research: Strengths, Limitations, Applications, and Strategies for Optimal Use of HIRA Data*. *J Korean Med Sci*, 2017. **32**(5): p. 718-728.

**Figure legends**

Fig. 1. Annual prevalence rate of spontaneous pneumothorax, by sex (per 100,000 people).

Fig. 2. Annual prevalence rate of spontaneous pneumothorax, by age (per 100,000 people).

Fig. 3. Annual prevalence rate of hospitalization due to spontaneous pneumothorax, by sex (per 100,000 people).

Fig. 4. Annual prevalence rate of hospitalization due to spontaneous pneumothorax, by age (per 100,000 people).

For peer review only

1  
2  
3  
4  
5  
6  
7  
8  
9  
10  
11  
12  
13  
14  
15  
16  
17  
18  
19  
20  
21  
22  
23  
24  
25  
26  
27  
28  
29  
30  
31  
32  
33  
34  
35  
36  
37  
38  
39  
40  
41  
42  
43  
44  
45  
46  
47  
48  
49  
50  
51  
52  
53  
54  
55  
56  
57  
58  
59  
60

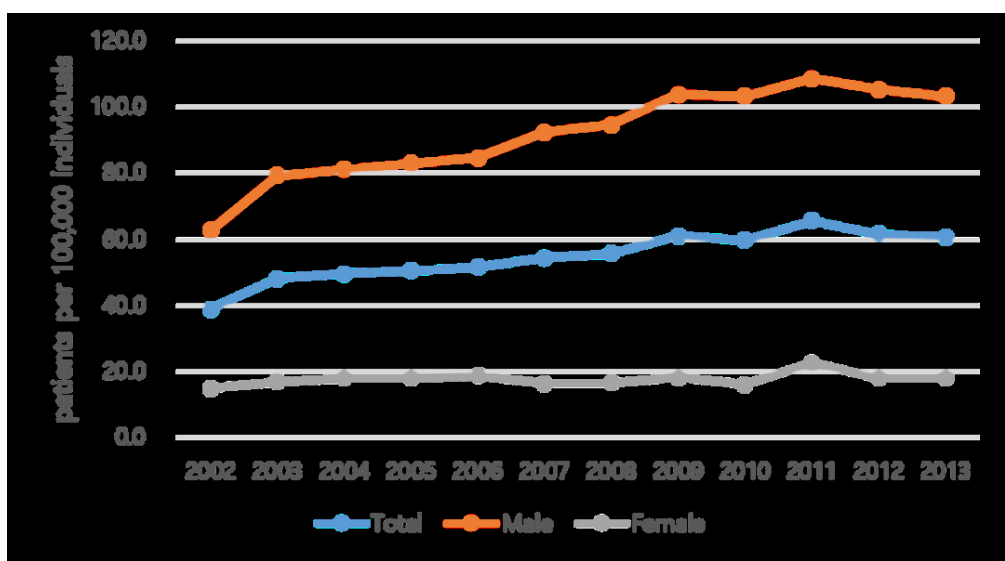

Fig.1

91x50mm (300 x 300 DPI)

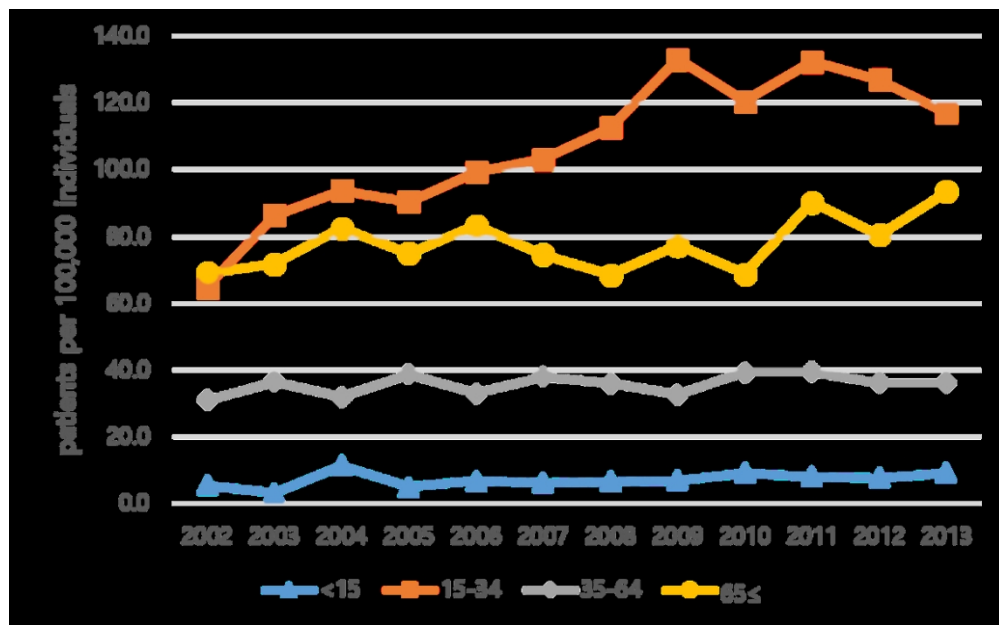

Fig.2

99x61mm (300 x 300 DPI)



1  
2  
3  
4  
5  
6  
7  
8  
9  
10  
11  
12  
13  
14  
15  
16  
17  
18  
19  
20  
21  
22  
23  
24  
25  
26  
27  
28  
29  
30  
31  
32  
33  
34  
35  
36  
37  
38  
39  
40  
41  
42  
43  
44  
45  
46  
47  
48  
49  
50  
51  
52  
53  
54  
55  
56  
57  
58  
59  
60

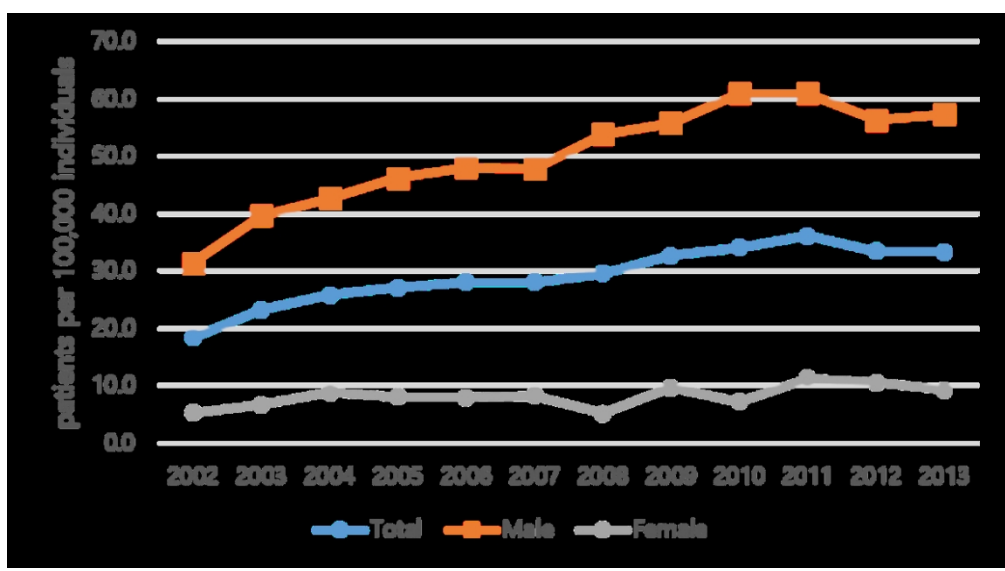

Fig.3

99x55mm (300 x 300 DPI)

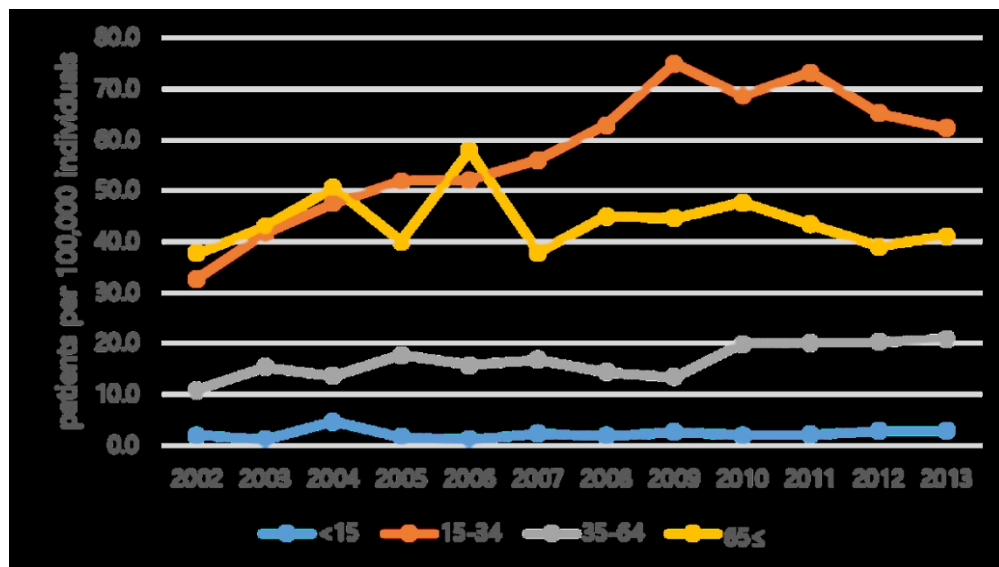

Fig.4

99x56mm (300 x 300 DPI)

**Supplementary Table 1.** ICD-10 codes of comorbidities in spontaneous pneumothorax

| <b>Disease</b>                   | <b>Code</b>                                     |
|----------------------------------|-------------------------------------------------|
| <b>COPD</b>                      | J40*, J41*, J42*, J43*, J44*, J961, J982        |
| <b>Pneumonia</b>                 | J12*, J13*, J14*, J15*, J16*, J18*              |
| <b>Interstitial lung disease</b> | J84*                                            |
| <b>Lung cancer</b>               | C34*, C780*, C783, D022-D024, D143*, D174, D381 |
| <b>Asthma</b>                    | J45*                                            |
| <b>Lung abscess</b>              | J850, J851, J852                                |

COPD, Chronic Obstructive Pulmonary Disease

**Supplementary Table 2.** Prevalence rate of spontaneous pneumothorax per 100,000 individuals and sociodemographic characteristics

|                          | 2002 |       | 2003 |       | 2004 |       | 2005 |       | 2006 |       | 2007 |       | 2008 |       | 2009 |       | 2010 |       | 2011 |       | 2012 |       | 2013 |       |
|--------------------------|------|-------|------|-------|------|-------|------|-------|------|-------|------|-------|------|-------|------|-------|------|-------|------|-------|------|-------|------|-------|
|                          | N    | Prev. |
| <b>Total SP Patients</b> | 398  | 38.8  | 490  | 48.2  | 504  | 49.6  | 514  | 50.5  | 518  | 51.7  | 555  | 54.4  | 557  | 55.7  | 610  | 61.1  | 598  | 59.7  | 661  | 65.7  | 623  | 61.6  | 616  | 60.7  |
| <b>Sex</b>               |      |       |      |       |      |       |      |       |      |       |      |       |      |       |      |       |      |       |      |       |      |       |      |       |
| Male                     | 322  | 62.7  | 404  | 79.3  | 412  | 81.1  | 422  | 83.0  | 424  | 84.7  | 471  | 92.4  | 474  | 94.6  | 519  | 103.9 | 518  | 103.3 | 547  | 108.7 | 532  | 105.2 | 524  | 103.3 |
| Female                   | 76   | 14.8  | 86   | 16.9  | 92   | 18.1  | 92   | 18.1  | 94   | 18.8  | 84   | 16.4  | 83   | 16.6  | 91   | 18.2  | 80   | 16.0  | 114  | 22.7  | 91   | 18.0  | 92   | 18.1  |
| <b>Age</b>               |      |       |      |       |      |       |      |       |      |       |      |       |      |       |      |       |      |       |      |       |      |       |      |       |
| < 15                     | 11   | 5.3   | 6    | 3.0   | 22   | 11.2  | 9    | 4.7   | 12   | 6.6   | 11   | 6.2   | 11   | 6.5   | 11   | 6.8   | 14   | 9.0   | 12   | 7.9   | 11   | 7.5   | 13   | 9.1   |
| 15–34                    | 220  | 64.8  | 281  | 86.3  | 298  | 93.9  | 281  | 90.4  | 297  | 99.3  | 311  | 103.2 | 328  | 112.6 | 382  | 133.2 | 344  | 120.6 | 376  | 132.4 | 359  | 127.2 | 329  | 117.1 |
| 35–64                    | 123  | 30.9  | 147  | 36.4  | 131  | 31.8  | 162  | 38.6  | 139  | 32.9  | 165  | 37.9  | 156  | 35.9  | 143  | 32.5  | 176  | 39.3  | 179  | 39.4  | 165  | 36.0  | 167  | 36.1  |
| ≥ 65                     | 55   | 69.1  | 62   | 71.7  | 75   | 82.6  | 71   | 74.8  | 82   | 83.2  | 79   | 74.6  | 73   | 68.4  | 85   | 77.3  | 78   | 68.8  | 106  | 90.3  | 99   | 80.5  | 120  | 93.5  |
| <b>Sub-divided Age</b>   |      |       |      |       |      |       |      |       |      |       |      |       |      |       |      |       |      |       |      |       |      |       |      |       |
| < 15                     | 11   | 5.3   | 6    | 3.0   | 22   | 11.2  | 9    | 4.7   | 12   | 6.6   | 11   | 6.2   | 11   | 6.5   | 11   | 6.8   | 14   | 9.0   | 12   | 7.9   | 11   | 7.5   | 13   | 9.1   |
| 15–19                    | 81   | 114.7 | 96   | 143.2 | 110  | 165.5 | 106  | 160.4 | 111  | 166.2 | 140  | 200.4 | 162  | 231.4 | 193  | 270.2 | 179  | 245.2 | 184  | 254.0 | 156  | 218.9 | 153  | 220.2 |
| 20–24                    | 54   | 63.7  | 91   | 109.1 | 71   | 89.2  | 66   | 86.9  | 73   | 104.6 | 71   | 104.9 | 58   | 91.3  | 77   | 122.8 | 77   | 123.2 | 92   | 142.8 | 105  | 156.8 | 93   | 134.6 |
| 25–29                    | 41   | 47.6  | 50   | 62.6  | 55   | 70.0  | 55   | 69.6  | 66   | 84.0  | 63   | 77.6  | 58   | 72.1  | 60   | 78.0  | 45   | 61.3  | 46   | 66.4  | 50   | 76.5  | 44   | 70.1  |
| 30–34                    | 33   | 33.6  | 38   | 39.9  | 40   | 43.1  | 45   | 50.2  | 35   | 41.6  | 26   | 31.4  | 39   | 50.5  | 41   | 54.1  | 29   | 38.0  | 42   | 53.9  | 37   | 47.1  | 26   | 32.7  |
| 35–39                    | 23   | 25.7  | 30   | 33.1  | 28   | 30.5  | 39   | 42.1  | 32   | 34.4  | 34   | 35.9  | 30   | 32.7  | 26   | 29.0  | 41   | 47.3  | 31   | 37.3  | 34   | 42.4  | 33   | 43.2  |
| 40–44                    | 19   | 20.0  | 23   | 24.6  | 21   | 22.9  | 26   | 28.9  | 18   | 20.9  | 23   | 26.6  | 21   | 24.2  | 28   | 31.7  | 24   | 26.8  | 30   | 32.9  | 26   | 28.3  | 25   | 27.5  |
| 45–49                    | 26   | 35.4  | 22   | 28.4  | 21   | 25.7  | 26   | 30.5  | 20   | 22.7  | 30   | 32.9  | 32   | 35.8  | 24   | 27.3  | 24   | 27.8  | 29   | 34.5  | 15   | 18.0  | 28   | 32.6  |
| 50–54                    | 13   | 24.2  | 23   | 42.4  | 22   | 38.8  | 19   | 30.8  | 21   | 31.7  | 26   | 36.9  | 26   | 35.5  | 23   | 29.6  | 26   | 32.0  | 33   | 38.6  | 35   | 40.0  | 25   | 28.4  |
| 55–59                    | 21   | 48.4  | 25   | 55.9  | 18   | 38.9  | 25   | 51.5  | 26   | 53.7  | 23   | 44.8  | 26   | 50.9  | 21   | 39.3  | 32   | 54.6  | 29   | 45.4  | 27   | 40.2  | 31   | 43.3  |
| 60–64                    | 21   | 48.7  | 24   | 55.1  | 21   | 48.8  | 27   | 64.2  | 22   | 54.0  | 29   | 70.6  | 21   | 50.3  | 21   | 48.5  | 29   | 63.5  | 27   | 58.4  | 28   | 57.8  | 25   | 50.5  |
| 65–69                    | 23   | 71.1  | 22   | 64.3  | 30   | 84.4  | 34   | 93.9  | 30   | 80.6  | 32   | 79.4  | 25   | 62.9  | 24   | 61.2  | 26   | 67.3  | 32   | 83.8  | 28   | 73.3  | 30   | 75.4  |
| 70–74                    | 16   | 74.4  | 19   | 82.4  | 21   | 85.7  | 15   | 57.0  | 25   | 90.1  | 25   | 85.1  | 24   | 80.2  | 33   | 105.6 | 14   | 43.6  | 22   | 65.5  | 12   | 33.2  | 27   | 73.2  |

|    |                           |     |      |     |      |     |      |     |      |     |      |     |      |     |      |     |      |     |      |     |       |     |       |     |       |
|----|---------------------------|-----|------|-----|------|-----|------|-----|------|-----|------|-----|------|-----|------|-----|------|-----|------|-----|-------|-----|-------|-----|-------|
| 1  |                           |     |      |     |      |     |      |     |      |     |      |     |      |     |      |     |      |     |      |     |       |     |       |     |       |
| 2  |                           |     |      |     |      |     |      |     |      |     |      |     |      |     |      |     |      |     |      |     |       |     |       |     |       |
| 3  | ≥ 75                      | 16  | 62.1 | 21  | 72.0 | 24  | 78.1 | 22  | 68.0 | 27  | 80.4 | 22  | 60.8 | 24  | 64.9 | 28  | 70.9 | 38  | 89.1 | 52  | 114.0 | 59  | 121.2 | 63  | 121.8 |
| 4  | <b>Income</b>             |     |      |     |      |     |      |     |      |     |      |     |      |     |      |     |      |     |      |     |       |     |       |     |       |
| 5  | Low (0-3)                 | 71  | 31.1 | 99  | 43.9 | 116 | 51.3 | 129 | 54.8 | 92  | 39.7 | 125 | 52.0 | 116 | 48.4 | 127 | 54.4 | 117 | 48.8 | 163 | 67.3  | 150 | 68.1  | 170 | 70.3  |
| 6  | Medium (4-7)              | 164 | 40.9 | 194 | 49.3 | 188 | 48.2 | 190 | 49.4 | 212 | 56.0 | 206 | 53.8 | 213 | 57.3 | 229 | 61.8 | 213 | 58.0 | 237 | 64.7  | 190 | 54.2  | 196 | 53.3  |
| 7  | High (8-10)               | 163 | 41.1 | 197 | 49.5 | 200 | 50.0 | 195 | 49.2 | 214 | 54.6 | 224 | 56.3 | 228 | 58.5 | 254 | 64.4 | 268 | 67.8 | 261 | 65.5  | 283 | 64.2  | 250 | 61.7  |
| 8  | <b>Insurance type</b>     |     |      |     |      |     |      |     |      |     |      |     |      |     |      |     |      |     |      |     |       |     |       |     |       |
| 9  | Region                    | 200 | 40.2 | 236 | 49.8 | 206 | 45.8 | 221 | 52.5 | 201 | 52.0 | 214 | 56.4 | 203 | 56.2 | 213 | 61.3 | 200 | 59.8 | 207 | 64.4  | 179 | 57.4  | 161 | 53.8  |
| 10 | <b>Employment</b>         |     |      |     |      |     |      |     |      |     |      |     |      |     |      |     |      |     |      |     |       |     |       |     |       |
| 11 | Region                    | 195 | 39.3 | 252 | 49.2 | 292 | 54.7 | 285 | 51.1 | 315 | 54.6 | 336 | 55.8 | 346 | 57.6 | 390 | 63.3 | 396 | 62.6 | 419 | 64.4  | 414 | 62.0  | 415 | 60.5  |
| 12 | <b>Medical Assistance</b> |     |      |     |      |     |      |     |      |     |      |     |      |     |      |     |      |     |      |     |       |     |       |     |       |
| 13 | Region                    | 3   | 9.8  | 2   | 6.3  | 6   | 18.1 | 8   | 21.1 | 2   | 5.1  | 5   | 12.7 | 8   | 20.5 | 7   | 19.8 | 2   | 5.7  | 35  | 103.7 | 30  | 95.8  | 40  | 132.9 |

---

Prev., Prevalence Rate

**Supplementary Table 3.** Annual prevalence rate of hospitalization due to spontaneous pneumothorax (per 100,000 individuals)

| Hospitalization |     |         |             | Sex  |       |            |        |       |            | Age (years) |       |            |       |       |            |       |       |            |      |       |            |
|-----------------|-----|---------|-------------|------|-------|------------|--------|-------|------------|-------------|-------|------------|-------|-------|------------|-------|-------|------------|------|-------|------------|
|                 |     |         |             | Male |       |            | Female |       |            | < 15        |       |            | 15–34 |       |            | 35–64 |       |            | ≥ 65 |       |            |
| Year            | N   | Pre v.* | Gro w. (%)† | N    | Prev. | Grow. (%)† | N      | Prev. | Grow. (%)† | N           | Prev. | Grow. (%)† | N     | Prev. | Grow. (%)† | N     | Prev. | Grow. (%)† | N    | Prev. | Grow. (%)† |
| 2002            | 188 | 18.3    |             | 161  | 31.4  |            | 27     | 5.3   |            | 4           | 1.9   |            | 111   | 32.7  |            | 43    | 10.8  |            | 30   | 37.7  |            |
| 2003            | 236 | 23.2    | 26.5        | 202  | 39.7  | 26.5       | 34     | 6.7   | 26.9       | 2           | 1.0   | -48.4      | 135   | 41.5  | 26.9       | 62    | 15.3  | 42.0       | 37   | 42.8  | 13.7       |
| 2004            | 262 | 25.8    | 11.1        | 217  | 42.7  | 7.6        | 45     | 8.9   | 32.3       | 9           | 4.6   | 360.9      | 151   | 47.6  | 14.7       | 56    | 13.6  | -11.3      | 46   | 50.7  | 18.3       |
| 2005            | 276 | 27.1    | 5.3         | 235  | 46.2  | 8.3        | 41     | 8.1   | -8.9       | 3           | 1.6   | -65.7      | 161   | 51.8  | 8.9        | 74    | 17.6  | 29.6       | 38   | 40.1  | -20.9      |
| 2006            | 281 | 28.0    | 3.3         | 241  | 48.1  | 4.1        | 40     | 8.0   | -1.0       | 2           | 1.1   | -29.8      | 156   | 52.1  | 0.6        | 66    | 15.6  | -11.3      | 57   | 57.8  | 44.4       |
| 2007            | 286 | 28.0    | -0.1        | 244  | 47.8  | -0.6       | 42     | 8.2   | 3.0        | 4           | 2.2   | 103.9      | 169   | 56.1  | 7.5        | 73    | 16.8  | 7.4        | 40   | 37.8  | -34.7      |
| 2008            | 296 | 29.6    | 5.6         | 270  | 53.9  | 12.6       | 26     | 5.2   | -36.7      | 3           | 1.8   | -20.7      | 183   | 62.8  | 12.1       | 62    | 14.3  | -14.9      | 48   | 45.0  | 19.1       |
| 2009            | 327 | 32.7    | 10.7        | 279  | 55.8  | 3.6        | 48     | 9.6   | 85.0       | 4           | 2.5   | 39.3       | 215   | 74.9  | 19.3       | 59    | 13.4  | -6.1       | 49   | 44.5  | -1.0       |
| 2010            | 342 | 34.1    | 4.2         | 306  | 61.0  | 9.3        | 36     | 7.2   | -25.3      | 3           | 1.9   | -22.0      | 196   | 68.7  | -8.3       | 89    | 19.9  | 48.2       | 54   | 47.6  | 6.9        |
| 2011            | 364 | 36.2    | 6.0         | 307  | 61.0  | -0.1       | 57     | 11.3  | 57.6       | 3           | 2.0   | 2.7        | 208   | 73.3  | 6.6        | 82    | 20.1  | 1.2        | 71   | 43.4  | -8.9       |
| 2012            | 338 | 33.4    | -7.6        | 285  | 56.4  | -7.6       | 53     | 10.5  | -7.5       | 4           | 2.7   | 36.7       | 184   | 65.2  | -11.0      | 83    | 20.2  | 0.7        | 67   | 39.1  | -9.9       |

1  
2  
3     **2013**   338   33.3   -0.4   291   57.4    1.8    47   9.3   -11.7   4   2.8   2.8   175   62.3   -4.5   86   20.8    3.0   73   41.0    5.0  
4

---

5   Prev., \*Prevalence rate: rate of prevalence per 100,000 individuals.  
6

7   Grow., †Growth rate (%) = (Current Year \*100) / Previous Year) - 100  
8  
9  
10  
11  
12  
13  
14  
15  
16  
17  
18  
19  
20  
21  
22  
23  
24  
25  
26  
27  
28  
29  
30  
31  
32  
33  
34  
35  
36  
37  
38  
39  
40  
41  
42  
43  
44  
45  
46

For peer review only

**Supplementary Table 4.** Rehospitalization of spontaneous pneumothorax patients

| Rehospitalization<br>(within)                | Number of<br>rehospitalizations |              | Number of hospitalizations per person |       |         |         |  |
|----------------------------------------------|---------------------------------|--------------|---------------------------------------|-------|---------|---------|--|
|                                              | N*                              | Cumulative % | Mean                                  | SD    | Minimum | Maximum |  |
| 6 months                                     | 1,022                           | 60.7         | 1.34                                  | 0.70  | 1       | 10      |  |
| 1 year                                       | 1,202                           | 71.4         | 1.40                                  | 0.80  | 1       | 12      |  |
| 2 years                                      | 1,412                           | 83.9         | 1.47                                  | 0.94  | 1       | 19      |  |
| Total                                        | 1,683                           | 100.0        | 1.56                                  | 1.07  | 1       | 19      |  |
| <b>Interval between<br/>hospitalizations</b> |                                 |              | 223.07                                | 445.3 | 0       | 3,989   |  |

\*N = Cumulative frequency



# BMJ Open

## Epidemiology and Medical Service Use for Spontaneous Pneumothorax: A 12-year Study Using Nationwide Cohort Data in Korea

|                                 |                                                                                                                                                                                                                                                                                                                                                                   |
|---------------------------------|-------------------------------------------------------------------------------------------------------------------------------------------------------------------------------------------------------------------------------------------------------------------------------------------------------------------------------------------------------------------|
| Journal:                        | <i>BMJ Open</i>                                                                                                                                                                                                                                                                                                                                                   |
| Manuscript ID                   | bmjopen-2018-028624.R1                                                                                                                                                                                                                                                                                                                                            |
| Article Type:                   | Research                                                                                                                                                                                                                                                                                                                                                          |
| Date Submitted by the Author:   | 12-Jun-2019                                                                                                                                                                                                                                                                                                                                                       |
| Complete List of Authors:       | Kim, Doori; Jaseng Spine and Joint Research Institute<br>Jung, boyoung; Jaseng Spine and Joint Research Institute<br>Jang, Bo-Hyoung; Department of Preventive Medicine<br>Chung, Seol Hee ; Health Insurance Review & Assessment Service<br>Lee, Yoon Jae ; Jaseng Spine and Joint Research Institute<br>Ha, In-Hyuk ; Jaseng Spine and Joint Research Institute |
| <b>Primary Subject Heading</b>: | Epidemiology                                                                                                                                                                                                                                                                                                                                                      |
| Secondary Subject Heading:      | Epidemiology                                                                                                                                                                                                                                                                                                                                                      |
| Keywords:                       | EPIDEMIOLOGY, Longitudinal cohort, National Health Insurance Service-Sample Cohort Database (NHIS-SCD), Prevalence, Primary Spontaneous Pneumothorax                                                                                                                                                                                                              |
|                                 |                                                                                                                                                                                                                                                                                                                                                                   |

SCHOLARONE™  
Manuscripts

1  
2  
3  
4 **Epidemiology and Medical Service Use for Spontaneous Pneumothorax: A 12-year**  
5 **Study Using Nationwide Cohort Data in Korea**  
6  
7  
8  
9

10  
11 Doori Kim<sup>1,2</sup>, Boyoung Jung<sup>1</sup>, Bo-Hyoung Jang<sup>3</sup>, Seol Hee Chung<sup>4</sup>, Yoon Jae Lee<sup>1\*</sup>, In-Hyuk  
12 Ha<sup>1\*</sup>  
13

14  
15 <sup>1</sup>Jaseng Spine and Joint Research Institute, Jaseng Medical Foundation, 3F 538 Gangnam-  
16 daero, Gangnam-gu, Seoul, Republic of Korea  
17

18  
19 <sup>2</sup>Department of Korean Preventive Medicine, College of Korean Medicine, Graduate School,  
20 Kyung Hee University, Hoegi-dong, Dongdaemun-gu, Seoul, 130-701, Republic of Korea  
21

22  
23 <sup>3</sup>Department of Preventive Medicine, College of Korean Medicine, Kyung Hee University,  
24 Hoegi-dong, Dongdaemun-gu, Seoul, 02447, Republic of Korea  
25

26  
27 <sup>4</sup>Department of Research, Health Insurance Review & Assessment Service, 60 Hyeoksins-ro  
28 (Bangok-dong), Wonju-si, Gangwon-do 26465, South Korea  
29

30  
31  
32  
33  
34 \*Correspondence should be addressed to: [hanihata@jaseng.org](mailto:hanihata@jaseng.org)(In-HyukHa) and  
35 [goodsmile@jaseng.org](mailto:goodsmile@jaseng.org) (Yoon Jae Lee)  
36

37  
38 In-Hyuk Ha  
39

40  
41 Jaseng Spine and Joint Research Institute, Jaseng Medical Foundation, 3F 538 Gangnam-  
42 daero, Gangnam-gu, Seoul, Republic of Korea  
43

44  
45 Tel: +82-2-2222-2740  
46

47  
48 Fax: +82-2-2222-2737  
49

50  
51 Mobile: +82-10-6659-4910  
52

53  
54 Email: [hanihata@jaseng.org](mailto:hanihata@jaseng.org)  
55  
56  
57  
58  
59  
60

## ABSTRACT

**Objectives:** This study aimed to promote an understanding of spontaneous pneumothorax by analyzing the prevalence rate and medical service use by patients with spontaneous pneumothorax according to sociodemographic characteristics.

**Design:** A 12-year nationwide study.

**Setting:** Data obtained from the Korean National Health Insurance Service Sharing Service.

**Participants:** A total of 4658 participants who used medical services due to spontaneous pneumothorax between 2002 and 2013 in Korea.

**Outcome measures:** For those diagnosed with spontaneous pneumothorax, the use of medical services, hospitalization data, sociodemographics, co-morbidity, treatment administered, and medication prescribed were recorded.

**Results:** The annual prevalence of spontaneous pneumothorax ranged from 39 to 66 per 100,000 individuals, while the prevalence of hospitalization due to spontaneous pneumothorax ranged from 18 to 36 per 100,000 individuals. The prevalence rate of spontaneous pneumothorax in Korea has increased since 2002. The male-to-female ratio was approximately 4–10:1, with a higher prevalence rate in males. By age, the 15–34-year-old group, and particularly 15–19-year-olds, showed the highest prevalence rate; the rate then declined before increasing again for those aged 65 years or older. In total, 47–57% of spontaneous pneumothorax patients underwent hospitalization. The average number of rehospitalizations due to pneumothorax was 1.56 per person, and more than 70% of recurrences occurred within 1 year. Chronic obstructive pulmonary disease (COPD) was the most common comorbidity. The average treatment period was 11 days as an outpatient and 14 days in-hospital. The average medical costs were \$94.50 for outpatients and \$2523 for hospital admissions. The most common treatment for spontaneous pneumothorax was oxygen inhalation and thoracostomy, and the most commonly prescribed medications were analgesics, antitussives, and antibiotics.

**Conclusions:** We here detailed the epidemiology and treatments for spontaneous

pneumothorax in Korea. This information can contribute to the understanding of spontaneous pneumothorax.

**Keywords:** Epidemiology, Longitudinal cohort, National Health Insurance Service-Sample Cohort Database (NHIS-SCD); Prevalence; Primary Spontaneous Pneumothorax

## STRENGTHS AND LIMITATIONS OF THIS STUDY

- Large-scale, long-term (12 years) follow-up data sets, representing the Korean population, were analyzed.
- Not only the inpatient costs but also the outpatient costs of spontaneous pneumothorax treatment were calculated.
- Data on detailed medical-service use, such as medication, procedures, surgery undertaken due to spontaneous pneumothorax, were recorded and analyzed.
- Due to a lack of relevant information in the claims data (for example, medical treatments are not necessarily covered by insurance), not all relevant treatments data could be considered.
- This study could not distinguish whether medical service use was due to new occurrences or follow-up of existing spontaneous pneumothorax.

## INTRODUCTION

The pulmonary system is important because it plays a crucial role in the oxygenation of the blood.[1] In pneumothorax, air or gas pools in the inter-pleural cavity,[2] leading to lung collapse and impaired pulmonary function.[3] Pneumothorax is categorized into spontaneous pneumothorax (SP) or traumatic pneumothorax, depending on etiology, and SP is subcategorized into primary spontaneous pneumothorax (PSP), occurring in the absence of underlying lung-related comorbidities, and secondary spontaneous pneumothorax (SSP), occurring in the presence of underlying lung-related comorbidities.[4]

The prevalence rate of SP per 100,000 individuals reportedly ranges from 1.2 to 9.8 in women to 7.4 to 24.0 in men; the prevalence rate of hospitalized SP per 100,000 individuals is about 17 to 22 in men, 6 to 7 in women, and 14 to 23 overall.[5-9] Although SP has a relatively low prevalence rate, it is clinically important,[10] as relapse rates are high (20–40%, depending on duration);[7, 11, 12] hospitalization is often required influencing work productivity. Furthermore, pneumothorax patients may be at high risk of stress.[13]

However, there is a paucity of research on SP.[14] There is a lack of knowledge about the modalities of management and the treatments of SP.[15] Given its low prevalence rate, large-scale research at a national scale is needed to evaluate the epidemiology of SP. Although large-scale studies have been performed in the UK, France, and Germany, these have provided limited epidemiological information.[6-8]

Thus, we aimed to determine the prevalence rate of SP and medical service use of patients treated for SP, according to sociodemographic characteristics, by implementing the National Sample Cohort (NSC) data from the National Health Insurance Service (NHIS) of Korea, to reformulate a more accurate understanding of the prevalence, treatment, and management of SP in Korea.

## METHODS

### Database

Twelve years of NHIS-NSC data (for the period 2002–2013) were analyzed. The National Health Insurance (NHI) system in Korea is a single-payer system to which 98% of citizens belong. Under this system, a medical provider requests reimbursement from a third-person payer (the NHIS) when a patient uses a medical service.[16, 17] The NHIS-NSC is a population-based cohort built by the NHIS. In 2002, a cohort was extracted by systematic stratified random sampling from a pool of 47,851,928 individuals, excluding those who were not enrolled in the NHI (income level of 0) and foreigners.[18] The cohort comprised of 1,476 levels, based on sex, age, and income. Finally, 2.2% of this pool (1,025,340 individuals) were extracted and data from newborns were added each year to maintain the sample size.[18]

### Study population and sampling

Our study was performed on 4,658 patients diagnosed with SP in the 12 years between January 2002 and December 2013 in Korea. SP patients were defined as those who used a medical service at least once for main or secondary diseases with the International Statistical Classification of Disease and Related Health Problems, 10<sup>th</sup> revision (ICD-10) J93.0 (Spontaneous tension pneumothorax), J93.1 (Other spontaneous pneumothorax), J93.8 (Other pneumothorax), or J93.9 (Pneumothorax, unspecified). S27 (Injury of other and unspecified intrathoracic organs) and S27.0X (Traumatic pneumothorax) were excluded because this analysis was only for SP patients.

### Main descriptive variables

#### Prevalence rate of SP

For each year, the frequency per 100,000 individuals and the frequency of patients who used medical services at least once for SP as the major or secondary diagnosis were determined. Sociodemographic characteristics are shown by sex, age, income level, and insurance type. Based on previous studies,[6, 8] age was subdivided as follows: < 15, 15–34, 35–64, and ≥

65 years. Income level was divided into low (0, 1, 2, or 3 out of 0–10), medium (4, 5, 6, or 7), or high (8, 9, or 10). Insurance type was divided into region-based enrollee, job-based enrollee, and medical assistance recipient.

For each year, the prevalence of SP per 100,000 individuals and the frequency of patients who were hospitalized due to SP were analyzed. In addition, prevalence rate of SSP was analyzed. SSP was operationally defined as SP patients with a diagnosis of underlying lung disease such as COPD, pneumonia, interstitial lung disease, lung cancer, asthma, and lung abscess within a year before the first date of SP onset. Patients who used hospitalization services at least once were counted; two or more hospitalizations were not counted more than once. The hospitalization rate among pneumothorax patients was calculated using the same standards: the denominator was the number of patients who used medical services at least once due to SP in a given year, by sex and age, and the numerator was the number of patients who used hospitalization services at least once.

#### Hospitalization of SP patients by year

Frequency of rehospitalization due to SP is shown by time period. The ratios of the total rehospitalization number to rehospitalization in a specific time period are also shown. The number of rehospitalizations counted all hospitalizations (other than the first-time) and allowed for duplication for each patient. To calculate the number of hospitalizations per person, the average, standard deviation (SD), minimum and maximum number of hospitalizations per time period were calculated. For the number of hospitalizations per person, first-time hospitalizations were also included. The interval between hospitalizations was calculated as the interval between the dates of two admissions.

#### Comorbidities in SP patients

Diseases were counted as comorbidities if they were diagnosed as the major or secondary disease within 1 year before the first date of SP onset. The number of patients who were given codes for frequent comorbidities, i.e., COPD, pneumonia, interstitial lung disease, lung cancer, asthma, and lung abscess, were counted; patients with multiple comorbid conditions were counted more than once.[8, 19] The Charlson Comorbidity Index (CCI) was categorized

1  
2  
3  
4 into normal and CCI 0, 1, 2, and  $\geq 3$ . [20-22] ICD-10 codes of comorbidities are shown in  
5  
6 Supplement Table 1.  
7  
8

#### 9 Treatment period and medical costs of SP patients

10  
11 The total number of follow-ups within 60 days after medical service use due to new SP onset,  
12 the number of follow-ups that occurred within a specified duration, and the comparative ratio  
13 of follow-ups within 60 days was analyzed. The mean, minimum, and maximum number of  
14 follow-ups, including the first medical service use, were analyzed. For hospitalization service  
15 users, the follow-up duration was calculated based on the date of discharge. The number of  
16 follow-ups in a specified period after discharge and the average number of follow-ups are  
17 shown.  
18  
19  
20  
21  
22  
23  
24

25 Additionally, the average follow-up duration and average medical costs for each new SP  
26 onset were also calculated, as was the average length of hospitalization for patients. Given  
27 that we analyzed administrative data, it was necessary to distinguish between medical service  
28 use due to new SP onset and that due to follow-up. Based on previous research indicating that  
29 air leaks from SP generally stops within approximately 15 days and that X-ray follow-up is  
30 recommended 2–4 weeks after discharge, [7, 23] screening analysis results and discussions  
31 with medical experts in Korea, SP follow-up duration was determined as 60 days. New SP  
32 onset was defined as cases in which no medical service use (due to SP) was recorded in the  
33 previous 60 days. When one patient experienced multiple new occurrences of SP, repeated  
34 counting was allowed.  
35  
36  
37  
38  
39  
40  
41  
42

43 The medical costs of SP patients included the average medical cost per person. Medical costs  
44 determined to be eligible for reimbursement by Health Insurance Review and Assessment  
45 Service (HIRA) out of treatment costs were indicated in the submitted insurance claim  
46 statement. Medical costs are the sum of benefits reimbursed by the insurer (NHIS) to the  
47 medical care institutions and self-payment costs paid by the beneficiary (patient). Each  
48 patient's medical costs were calculated as the sum of costs listed on their claims. The average  
49 medical costs were the amount of total medical expenses for one year divided by the number  
50 of patients.  
51  
52  
53  
54  
55  
56

---



## Treatment and medication for SP patients

In terms of treatment of SP patients, the most frequent treatment with a code that corresponds to the “Procedure/surgery” category in the statement listing SP as the major or secondary diagnosis was given. All statements prescribing the corresponding treatment were counted and duplication of treatments and patients were allowed. Treatments were categorized as non-surgical treatments and surgical treatments. Non-surgical treatment included oxygen inhalation, nebulizer treatment of the lower airway, suction drainage or tracheostomy suction and tracheal intubation, and surgical treatment included thoracostomy, wedge resection of the lung, resection of bullae, and pleurodesis. The criteria distinguishing between surgical and non-surgical treatments were in accordance with the classification of the claims data. Percentages were calculated by having the denominator as codes that correspond to the “Procedure/surgery” category, excluding costs of materials, drugs used during treatment and list of tests. For medications, the most frequent treatment belonging to the code that corresponds to the “Medication” category in the diagnostic statement was given. Among frequently prescribed drugs, digestants were excluded. Similar to “Procedure/surgery”, all statements that prescribed the corresponding drug were counted; and drug and patient duplication was allowed. Medication data were limited to cases of inpatient prescription, while outpatient prescriptions were excluded. Based on the 5<sup>th</sup> Anatomical Therapeutic Chemical (ATC) Classification System level,[11, 12, 24] notation of the medication taken was indicated by the 5-step code of the chemical name; and the three drugs that did not undergo the 5-step classification were indicated by their ingredients.

### **Statistical analysis**

The total annual prevalence rate of SP and that of hospitalization due to SP are shown in frequency and frequency per 100,000 individuals. It was calculated by dividing the corresponding frequency by the total population that fits in the corresponding range and multiplying by 100,000. Categorical variables, such as the sociodemographic characteristics, number of rehospitalizations per period, comorbidities, CCI level, and follow-up frequency per period, treatment and drugs for the total number of SP patients for 12 years, are shown as frequencies and percentages. Continuous variables, such as number of hospitalizations, CCI

value, total follow-up frequency, length of hospitalization in days and medical costs, are reflected by calculating the average, SD, minimum, and maximum values. Logistic regression analysis was performed including age, sex, income, type of insurance and comorbidity to identify factors influencing hospitalization rate. Data cleaning and analyses were conducted using the statistical package SAS version 9.4 (SAS Institute Inc., Cary, NC).

### The patient and public involvement statement

Encrypted and published data was used in this study. Thus, there were no patients' involvement in this study.

## RESULTS

### Sociodemographic characteristics of SP patients

The sociodemographic characteristics of SP patients are shown in Table 1. During 2002 to 2013, 4,658 patients used medical services for SP as their major or secondary diagnosis, at least once. The male-to-female ratio was about 4.4:1. Most patients were 15–34-year-olds, while those below 15-years were least affected. Most were in the high-income group, while the low-income group utilized medical services the least. Job-based enrollees were the most common category.

Table 1. Sociodemographic characteristics of spontaneous pneumothorax patients

|             | All SP<br>(n=4,658) | %*   |
|-------------|---------------------|------|
| Sex         |                     |      |
| Male        | 3,796               | 81.5 |
| Female      | 862                 | 18.5 |
| Age (years) |                     |      |
| < 15        | 123                 | 2.6  |
| 15–34       | 2,407               | 51.7 |
| 35–64       | 1,374               | 29.5 |

|                |                    |       |      |
|----------------|--------------------|-------|------|
|                | ≥ 65               | 754   | 16.2 |
| Income range   |                    |       |      |
|                | Low (0–3)          | 1,037 | 22.3 |
|                | Medium (4–7)       | 1,725 | 37.0 |
|                | High (8–10)        | 1,896 | 40.7 |
| Insurance type |                    |       |      |
|                | Region             | 1,741 | 37.4 |
|                | Job                | 2,804 | 60.2 |
|                | Medical Assistance | 113   | 2.4  |

\*% =  $N / 4,658 \times 100$ , SP: spontaneous pneumothorax

### Prevalence rate of SP

The annual prevalence rate of SP (SP patients per 100,000 individuals) by sex ranged from 39 to 66 per 100,000 individuals, depending on the year (Fig. 1). The prevalence rate of SP consistently increased from 2002 to 2011 and decreased slightly thereafter. Among males, the rate was 63 per 100,000 individuals in 2002, and then increased consistently to 109 per 100,000 individuals in 2011. Thereafter, it decreased slightly, but the rate still exceeded 100 per 100,000 individuals in 2012 and 2013. Among females, the rate was 15 per 100,000 individuals in 2002, and remained essentially constant at 15–18 per 100,000 individuals, except for an increase to 23 per 100,000 individuals in 2011. The male-to-female ratio slowly increased from 4.2:1 in 2002, to a ratio of 6.5:1 in 2010.

In all years, except 2002, the SP prevalence rate was the highest in the 15–34-year-old group, followed by the ≥ 65-year-old, 34–64-year-old, and < 15-year-old groups (Fig. 2). The prevalence rate for those in the 15–34-year-old group was 64.8 per 100,000 individuals in 2002, which then increased to 133.2 per 100,000 individuals in 2009. The rate in the ≥ 65-year-olds also increased, from 69.1 per 100,000 individuals in 2002 to 93.5 per 100,000 individuals in 2013.

The prevalence rate of SP by sex, age, income level, and insurance type are summarized in

1  
2  
3  
4 Supplement Table 2. To examine the detailed distribution by age, age groups were further  
5 subdivided into 5-year increments. The prevalence rate tended to be the highest at 15–19  
6 years, decreased to 40–49 years, and then peaked again at 65–74 years before decreasing  
7 again (Supplement fig.1). The prevalence rate was slightly higher in the high-income group,  
8 but remained low among medical-assistance recipients, although this rate increased after  
9 2011 to a rate higher than that of health insurance enrollees.  
10  
11  
12  
13  
14

15 The prevalence rates of SP patients who were hospitalized are shown in Figs. 3 and 4. The  
16 rate of hospitalization was 18.3 per 100,000 individuals in 2002, increasing to 36.2 per  
17 100,000 individuals in 2011 before decreasing in 2012. The rate of hospitalization in men  
18 was 31.4 per 100,000 individuals in 2002, which increased to 61.0 per 100,000 individuals in  
19 2011. Among women, the hospitalization rate was 5.3 per 100,000 individuals in 2002 and  
20 11.3 per 100,000 in 2011. This rate decreased for both sexes in 2012. The rate tended to  
21 increase up to 2012 for men, but there was no consistent trend for females. The male-to-  
22 female ratio of hospitalization was 6:1 on average. By age, hospitalization in the 15–34-year  
23 age group was the highest at 33–75 per 100,000 individuals, followed by the  $\geq$  65-year-old  
24 group and the 35–64-year-old group. The rate was the lowest for the  $<$  15-year-old group, at  
25 1–3 per 100,000 individuals. The prevalence of hospitalized SP patients among the total  
26 population, by age and sex, are shown in Supplement Table 3.  
27  
28  
29  
30  
31  
32  
33  
34  
35  
36

37 The prevalence rates of SSP ranged from 10.5 to 12.1 per 100,000 individuals, from 8.5 to  
38 9.6 in male and 1.4 to 2.7 in female (Supplement fig. 2).  
39  
40  
41

### 42 **Hospitalization of SP patients by year**

43

44 Within the SP patient sample, the proportion of those receiving hospital treatments was  
45 defined as the hospitalization treatment rate. The number of patients who used the  
46 hospitalization service for SP in 2002 was 188 (47.2%) (Table 2). The rate of hospitalization  
47 treatment slowly increased thereafter up to 2010 and then decreased slightly. No sex-related  
48 differences in hospitalization treatment rates were observed. However, for age-related  
49 differences, the  $\geq$  65-year-old group had the highest hospitalization treatment rate, while the  
50  $<$  15-year-old group had the lowest rate. In addition, as a result of the logistic regression  
51  
52  
53  
54  
55  
56  
57

1  
2  
3  
4 analysis model, the hospitalization rate was influenced by sex, age and underlying lung  
5 disease (Supplement Table 4).  
6  
7

8  
9 The frequency and proportion of rehospitalization of SP patients is shown in Supplement  
10 Table 5. In total, 3,005 patients used hospital services at least once due to SP between 2002  
11 and 2013. Among these, 1,683 were rehospitalized, with 60.7% of all rehospitalizations  
12 occurring within 6 months and 71.4% within 1 year. The average number of hospitalizations  
13 per person overall was 1.56, at an average interval of 223.07 days.  
14  
15  
16  
17

---

18  
19  
20  
21  
22  
23  
24  
25  
26  
27  
28  
29  
30  
31  
32  
33  
34  
35  
36  
37  
38  
39  
40  
41  
42  
43  
44  
45  
46  
47  
48  
49  
50  
51  
52  
53  
54  
55  
56  
57  
58  
59  
60

For peer review only

Table 2. Rate of hospitalization treatment for spontaneous pneumothorax patients

|      | Total<br>SP<br>(N) | Total<br>HP<br>(N) | HR<br>(%)* | Sex  |      |        |      | Age (years) |      |       |      |       |      |      |      |
|------|--------------------|--------------------|------------|------|------|--------|------|-------------|------|-------|------|-------|------|------|------|
|      |                    |                    |            | Male |      | Female |      | < 15        |      | 15–34 |      | 35–64 |      | ≥ 65 |      |
|      |                    |                    |            | N    | HR*  | N      | HR*  | N           | HR*  | N     | HR*  | N     | HR*  | N    | HR*  |
| 2002 | 398                | 188                | 47.2       | 161  | 50.0 | 27     | 35.5 | 4           | 36.4 | 111   | 53.1 | 43    | 35.0 | 30   | 54.5 |
| 2003 | 490                | 236                | 48.2       | 202  | 50.0 | 34     | 39.5 | 2           | 33.3 | 135   | 49.1 | 62    | 42.2 | 37   | 59.7 |
| 2004 | 504                | 262                | 52.0       | 217  | 52.7 | 45     | 48.9 | 9           | 40.9 | 151   | 54.7 | 56    | 42.7 | 46   | 61.3 |
| 2005 | 514                | 276                | 53.7       | 235  | 55.7 | 41     | 44.6 | 3           | 33.3 | 161   | 59.2 | 74    | 45.7 | 38   | 53.5 |
| 2006 | 518                | 281                | 54.2       | 241  | 56.8 | 40     | 42.6 | 2           | 16.7 | 156   | 54.7 | 66    | 47.5 | 57   | 69.5 |
| 2007 | 555                | 286                | 51.5       | 244  | 51.8 | 42     | 50.0 | 4           | 36.4 | 169   | 56.3 | 73    | 44.2 | 40   | 50.6 |
| 2008 | 557                | 296                | 53.1       | 270  | 57.0 | 26     | 31.3 | 3           | 27.3 | 183   | 57.7 | 62    | 39.7 | 48   | 65.8 |
| 2009 | 610                | 327                | 53.6       | 279  | 53.8 | 48     | 52.7 | 4           | 36.4 | 215   | 58.0 | 59    | 41.3 | 49   | 57.6 |
| 2010 | 598                | 342                | 57.2       | 306  | 59.1 | 36     | 45.0 | 3           | 21.4 | 196   | 59.4 | 89    | 50.6 | 54   | 69.2 |
| 2011 | 661                | 364                | 55.1       | 307  | 56.1 | 57     | 50.0 | 3           | 25.0 | 208   | 57.1 | 82    | 45.8 | 71   | 67.0 |
| 2012 | 623                | 338                | 54.3       | 285  | 53.6 | 53     | 58.2 | 4           | 36.4 | 184   | 52.9 | 83    | 50.3 | 67   | 67.7 |
| 2013 | 616                | 338                | 54.9       | 291  | 55.5 | 47     | 51.1 | 4           | 30.8 | 175   | 55.4 | 86    | 51.5 | 73   | 60.8 |

\* Hospitalization rate (%) =  $N / \text{total number of spontaneous pneumothorax patients} \times 100$

SP : spontaneous pneumothorax, HR : Hospitalization rate, HP : Hospitalized patients

## Comorbidities in SP patients

Lung-related comorbidities in SP patients by age are shown in Table 3. For the < 15-year-old group, there were no particular comorbidities. COPD was the most common comorbidity, followed by pneumonia and asthma.

Table 3. Comorbidities of spontaneous pneumothorax patients

|              | 15–34        |      | 35–64        |      | ≥ 65       |      | Total        |      |
|--------------|--------------|------|--------------|------|------------|------|--------------|------|
|              | years        |      | years        |      | years      |      |              |      |
|              | N            | %*   | N            | %†   | N          | %‡   | N            | %§   |
| <b>Total</b> | <b>2,407</b> |      | <b>1,374</b> |      | <b>497</b> |      | <b>4,658</b> |      |
| COPD         | 273          | 11.3 | 277          | 20.2 | 287        | 57.7 | 837          | 18.0 |
| Pneumonia    | 102          | 4.2  | 109          | 7.9  | 150        | 30.2 | 361          | 7.8  |
| Interstitial | 4            | 0.2  | 17           | 1.2  | 13         | 2.6  | 34           | 0.7  |
| Lung cancer  | 11           | 0.5  | 72           | 5.2  | 67         | 13.5 | 150          | 3.2  |
| Asthma       | 63           | 2.6  | 111          | 8.1  | 174        | 35.0 | 348          | 7.5  |
| Lung abscess | 1            | 0.0  | 8            | 0.6  | 0          | 0.0  | 9            | 0.2  |
| CCI          |              |      |              |      |            |      |              |      |
| Mean         | 0.25         |      | 0.69         |      | 1.31       |      | 0.47         |      |
| 0            | 1,823        | 75.7 | 708          | 51.5 | 173        | 34.8 | 2,704        | 58.1 |
| 1            | 468          | 19.4 | 420          | 30.6 | 305        | 61.4 | 1,193        | 25.6 |
| 2            | 45           | 1.9  | 165          | 12.0 | 166        | 33.4 | 376          | 8.1  |
| 3 or more    | 5            | 0.2  | 65           | 4.7  | 99         | 19.9 | 159          | 3.4  |

\* % =  $N / 2,407 \times 100$

† % =  $N / 1,374 \times 100$

‡ % =  $N / 496 \times 100$

§ % =  $N / 4658 \times 100$

COPD, Chronic Obstructive Pulmonary Disease; CCI, Charlson Comorbidity Index

1  
2  
3  
4 COPD was more common in the  $\geq 65$ -year-old group than in the younger age groups. Fewer  
5  
6 patients among the 15–34-year-old group had asthma than pneumonia. The prevalence of all  
7  
8 comorbidities other than lung abscess was the highest in the  $\geq 65$ -year-old group. The lung cancer  
9  
10 rate was lower in the 15–34-year-old and 35–64-year-old groups than in the  $\geq 65$ -year-old group.

11  
12 The average CCI value of SP patients was 0.47 and increased with increasing age. The number of  
13  
14 patients with a CCI value of 0 decreased with increasing age, while that of patients with a CCI value  
15  
16 of  $\geq 3$  increased with increasing age.

### 17 18 19 **Treatment period and medical costs of SP patients**

20  
21 There were 4,157 outpatient service users among patients with first-time SP (no use of medical  
22  
23 service for SP for 60 days prior) from 2002 to 2013 (Table 4). Among these, 3,035 required follow-  
24  
25 up within 60 days of the first onset of SP. Most follow-ups occurred within 30 days. The average  
26  
27 number of follow-ups in each time period including the first-time visit was found to be 1.14 days  
28  
29 within 7 days, 1.33 days within 14 days, 1.54 days within 30 days, and 1.73 days within 60 days. The  
30  
31 average length of time between follow-ups was 11.07 days and the average medical cost per person  
32  
33 was \$94.5 (106,766 KRW).

---



Table 4. Outpatient or inpatient treatment period and medical costs of spontaneous pneumothorax

|                                |       | FU frequency during period | Total FU frequency (Including first visit)            |       |       |     |         |
|--------------------------------|-------|----------------------------|-------------------------------------------------------|-------|-------|-----|---------|
|                                |       | Cumulative frequency       | Total FU frequency (Within 60 days) Comparative ratio | Mean  | SD    | min | max     |
| <b>Outpatient FU</b>           |       |                            |                                                       |       |       |     |         |
| First-time outpatient use      | 4,157 |                            |                                                       |       |       |     |         |
| Within 7 days                  |       | 582                        | 19.2                                                  | 1.14  | 0.42  | 1   | 6       |
| Within 14 days                 |       | 1,372                      | 45.2                                                  | 1.33  | 0.63  | 1   | 8       |
| Within 30 days                 |       | 2,245                      | 74.0                                                  | 1.54  | 0.84  | 1   | 13      |
| Within 60 days                 |       | 3,035                      | 100.0                                                 | 1.73  | 1.07  | 1   | 13      |
| Average follow-up period       |       |                            |                                                       | 11.07 | 16.55 | 0   | 60      |
| Average medical costs (US \$)* |       |                            |                                                       | 94.5  | 141.5 | 0.9 | 2,673.6 |
| <b>Hospitalization FU</b>      |       |                            |                                                       |       |       |     |         |
| First-time                     | 3,005 |                            |                                                       |       |       |     |         |

|                                           |     |       |         |         |      |          |
|-------------------------------------------|-----|-------|---------|---------|------|----------|
| hospitalization use                       |     |       |         |         |      |          |
| Within 7 days                             | 180 | 30.0  | 1.06    | 0.24    | 1    | 3        |
| Within 14 days                            | 301 | 50.1  | 1.10    | 0.31    | 1    | 3        |
| Within 30 days                            | 451 | 75.0  | 1.15    | 0.40    | 1    | 5        |
| Within 60 days                            | 601 | 100.0 | 1.20    | 0.48    | 1    | 7        |
| Average number of days of hospitalization |     |       | 14.19   | 18.25   | 0    | 601      |
| Average follow-up period                  |     |       | 3.67    | 10.67   | 0    | 60       |
| Average medical costs (US \$)*            |     |       | 2,523.0 | 2,692.2 | 45.9 | 48,967.3 |

\*The cost of items determined to be eligible for reimbursement by the HIRA (Health Insurance Review and Assessment Service) out of the total treatment amount were indicated in the submitted insurance claim statement. It was converted from Korean Won to US dollar, according to the exchange rate on October 12, 2018 (US \$1.00 = Korean 1,130 Won).

FU : follow-up; SD: standard deviation; min: minimum; max: maximum

1  
2  
3  
4 The number of hospitalizations for first cases of SP was 3,005, of which 601 required follow-up  
5 within 60 days of discharge. Most follow-ups occurred within 30 days and the proportion of  
6 follow-ups occurring in the first week was higher for in-patients than for outpatient service users.  
7  
8 The average number of follow-ups was lower for inpatients than for outpatient service users. The  
9 average length of hospitalization was 14.19 days. The average follow-up period after discharge  
10 was 3.67 days and the average medical costs for each hospitalization were markedly higher than  
11 those of outpatients.  
12  
13  
14  
15

### 16 17 **Treatment and medication for SP patients** 18

19  
20 Treatment and medication details are shown in Table 5. The most commonly received non-  
21 surgical treatment for SP patients was oxygen inhalation, followed by suction drainage or  
22 tracheostomy suction. Thoracostomy was the most common surgical treatment, followed by lung  
23 wedge resection. The frequency of other surgical treatments was low. The rate of surgery for SP  
24 varied by year, but was estimated at about 40%. It was highest at 47.5% in 2010 and slightly  
25 decreased thereafter. By sex, the rate of surgery was higher in males than females (Supplement  
26 fig. 3).  
27  
28  
29  
30  
31

32  
33 Medication commonly prescribed for SP could be categorized into analgesics, antitussives, and  
34 antibiotics, when excluding digestants. Among analgesics, paracetamol, codeine combinations,  
35 excluding psycholeptics and tramadol as well as paracetamol combinations were prescribed at  
36 similar rates. Among antitussives, most prescribed was bromhexine. Among antibiotics, cefixime  
37 was the most frequently prescribed.  
38  
39  
40  
41  
42  
43  
44  
45  
46  
47  
48  
49  
50  
51  
52  
53  
54  
55  
56  
57  
58  
59  
60

---

Table 5. Treatments and drugs used for spontaneous pneumothorax patients

|                                                | Treatment     |      | Drugs                                         |           |
|------------------------------------------------|---------------|------|-----------------------------------------------|-----------|
|                                                | N             | %*   | N                                             | %†        |
| Total count of prescription statements         | <b>21,107</b> |      | <b>37,488</b>                                 |           |
| <b>Non-surgical treatments</b>                 |               |      | <b>Analgesics</b>                             |           |
| Oxygen Inhalation                              | 4,351         | 20.6 | Paracetamol                                   | 1,039 2.8 |
| Nebulizer Treatment Of Lower Airway            | 534           | 2.5  | Codeine, combinations excluding psycholeptics | 878 2.3   |
| Suction Drainage Or Tracheostomy Suction, Etc. | 2,481         | 11.8 | Tramadol and paracetamol                      | 832 2.2   |
| Tracheal Intubation                            | 81            | 0.4  | Propionic acid-derivatives                    | 784 2.1   |
| <b>Surgical treatments</b>                     |               |      | Aceclofenac                                   | 455 1.2   |
| Thoracostomy                                   | 3,132         | 14.8 | <b>Antitussives</b>                           |           |
| Wedge Resection Of Lung                        | 1,304         | 6.2  | Acetylcysteine                                | 672 1.8   |
| Resection Of Bullae                            | 125           | 0.6  | Xanthines                                     | 635 1.7   |
| Pleurodesis                                    | 27            | 0.1  | Bromhexine                                    | 789 2.1   |
| Apicolysis, Pleurolysis                        | 15            | 0.1  | Ambroxol                                      | 553 1.5   |
| Lobectomy Of Lung                              | 13            | 0.1  | <b>Antibiotics</b>                            |           |
| Pleurectomy                                    | 12            | 0.1  | Cefixime                                      | 374 1.0   |
| Segmentectomy Of Lung                          | 10            | 0.0  | Third-generation cephalosporins               | 305 0.8   |

1  
2  
3  
4  
5  
6  
7  
8  
9  
10  
11  
12  
13  
14  
15  
16  
17  
18  
19  
20  
21  
22  
23  
24  
25  
26  
27  
28  
29  
30  
31  
32  
33  
34  
35  
36  
37  
38  
39  
40  
41  
42  
43  
44  
45  
46  
47  
48  
49  
50  
51  
52  
53  
54  
55  
56  
57  
58  
59  
60

|                       |   |     |
|-----------------------|---|-----|
| Pleural Decortication | 8 | 0.0 |
| Primary Thoracoplasty | 4 | 0.0 |

---

\*% = N / 21,107

†% = N / 37,488

For peer review only

## DISCUSSION

In this large study in Korea, the annual prevalence rate of SP was 39–66 per 100,000 individuals. These numbers were slightly higher than those previously reported: 1.2–7.4 per 100,000 individuals in Minnesota [5] and 9.8–24 per 100,000 individuals in the United Kingdom.[6] The reason for these differences may be because SP was defined as cases in which medical service was used, which could include follow-up appointments, rather than the strict number of incidents. In contrast, the prevalence rate of hospitalization due to SP was 18–36 per 100,000 individuals overall. These rates were previously reported as 14.3–22.7 per 100,000 individuals overall,[7, 8] and are similar to those found in our study. The similarity may be because hospitalization was as a result of new SP incidents only. In addition, the prevalence rate of SP consistently increased from 2002 to 2011 and decreased slightly thereafter. This is consistent with previous a study that showed increased prevalence of SP.[25] Though the cause of increased SP can be presumed to be atmospheric conditions; however, the increase in other underlying lung diseases such as COPD or lung cancer still remains controversial. In this study, there was no significant change in the prevalence rate of SSP by year, which implies that PSP was increased. Further study is therefore needed.[26-28]

The prevalence rate was much higher for males than in previous studies. The male-to-female ratio for all SP and for hospitalized SP was higher than that reported previously (2.4:1–3.3:1).[6, 8, 9] In terms of age, the prevalence rate was the highest for the 15–34-year-old group, particularly for the 15–19-year-old group, followed by the  $\geq 65$ -year-old, 35–64-year-old, and  $< 15$ -year-old group, respectively. Previous studies showed a peak-age for SP at 20, followed by a later peak at 70.[8, 29] Overall, the incidence of SP was higher in Korea, particularly in males and at a slightly earlier age (15–19 years) than in other countries: e.g., 20–25 years in France [7] and Germany,[8] and 20–24 years or 30–34 years in England.[6] The prevalence of SP in males increased until 2012, while there was no clear trend in females. Since there was no previous large-scale research in Eastern countries, we cannot conclude whether these results are due to ethnicity or environment. In addition, the choice of terms between ‘prevalence’ and ‘incidence’ was one of the challenges of this study. It was determined to use ‘prevalence’ because there were several previous studies that reported ‘prevalence’ and this study was based on the occurrence of

1  
2  
3  
4 within the period of a year.  
5

6  
7 SP has a high rate of hospitalization;[30] 47–57% of SP patients in our study received hospital  
8 treatment. There were no marked differences due to sex, although the female hospitalization rate  
9 was slightly lower. The hospitalization rate was highest in the  $\geq 65$ -year-old group and lowest  
10 in the  $< 15$ -year-old group. The necessity of hospitalization for SP is debated. Hallifax and  
11 Rahman stated in 2015 that outpatient treatment is sufficient for patients who are young, have no  
12 comorbidities, and have stable vital signs; however, the evidence of outpatient treatment stability  
13 is lacking.[10]  
14  
15

16  
17 SP has a high rate of relapse;[24, 25, 31] with 1,683 of 3,003 first-time hospitalization cases  
18 requiring rehospitalization in our study. Although previous studies have shown that the relapse  
19 rate of SP is 15–40%,[7, 11, 12, 25, 32] these studies were based on small sample sizes (82–273  
20 subjects). [7, 11, 12, 25, 32] Though there was a large-scale study, only hospitalized patients  
21 were analyzed.[25] The risk factors for SP relapse are controversial; some studies indicate that  
22 elderly people and women are at higher risk,[7, 33] while other studies indicate that age and sex  
23 have no significant effect.[34] Furthermore, low BMI [12, 35], non-surgical treatment and  
24 smoking habits [12, 34] have been implicated in SP, yet further study is required to delineate the  
25 risk factors.  
26  
27

28  
29 SP can involve lung-related comorbidities.[36, 37] To distinguish between PSP and SSP, it is  
30 important to evaluate comorbidities. This distinction is important, as these conditions have  
31 different characteristics and prognoses;[23, 38] however, categorizing these conditions based on  
32 administrative data remains challenging.[19] This is because there are no codes to differentiate  
33 between PSP and SSP in the ICD categorizations. Nevertheless, our objective was to describe  
34 details related to SP; thus, we examined the current comorbidity status, rather than attempting to  
35 categorize SP patients. Among comorbidities, COPD was the most common in all age groups.  
36 With increasing age, the proportion of patients with comorbidities increased; thus, with  
37 increasing age, SSP was more common than PSP. Therefore, the decrease in SP risk with age,  
38 followed by an increase, may be due to an increase in SSP in particular.  
39  
40  
41  
42  
43  
44  
45  
46  
47  
48  
49  
50  
51  
52  
53

54  
55 The approximate treatment period for SP was 11 days for outpatients and 17.7 days for  
56  
57

1  
2  
3  
4 hospitalized patients. The average number of follow-ups within 60 days was 1.73. Thus, many  
5 cases of SP were minor and a single outpatient visit is necessary to complete the treatment. For  
6 both hospitalization and outpatient service users, 75% of total follow-ups occurred within 1  
7 month; hence, the follow-up duration for SP is short. Few studies have assessed the treatment or  
8 follow-up duration for SP, yet our results are similar to a previous study reporting a remission  
9 period of 7–15 days for SP,[23, 39]. X-ray follow-up is recommended within 2–4 weeks of  
10 discharge [35] and the median value of length of stay (LOS) is 6–7 days.[7, 33] No previous  
11 study has reported the socioeconomic costs due to SP; in our study, we found an average medical  
12 cost of \$94.50 per person for outpatient services and of \$2,523.00 per person for hospitalization.  
13 The maximum costs were \$2,673.60 per person for outpatient and \$48,967.30 per person for  
14 hospitalization.  
15  
16  
17  
18  
19  
20  
21  
22

23  
24 For treatment, surgery, and medication for SP patients, we reported the frequency of  
25 prescriptions rather than the number of people. Oxygen inhalation among non-surgical  
26 treatments and thoracostomy among surgical treatments were the most common procedures. A  
27 previous study has also shown that the most common treatment for SP patients is thoracostomy  
28 (92% of patients).[32] The surgery most commonly performed after thoracostomy is lung wedge  
29 resection; this involves removing a portion of the lung and is less invasive, preserves more lung  
30 function, and has fewer side-effects than lobar resection.[40, 41] The rate of surgery showed a  
31 mild tendency to increase until 2010 and then decreased slightly thereafter. It was not possible to  
32 confirm whether this was due to the severity of SP or the medical practice tendency in Korea.  
33 For medication; analgesics, antitussives, and antibiotics were the most frequently prescribed,  
34 after excluding digestants. For convenience of analysis, we excluded outpatient prescriptions.  
35 Considering that the rate of hospitalization exceeded 60% for SP patients, prescription patterns  
36 are not likely to differ markedly between hospitalized and overall cases.  
37  
38  
39  
40  
41  
42  
43  
44  
45  
46

47 This study has several limitations. First, we could not distinguish between PSP and SSP because  
48 of the limitations of the data. Accordingly, it was also impossible to present each treatment  
49 methods. According to a study analyzing the first line treatment and management of PSPs and  
50 SSPs, there are differences with PSPs and SSPs in management methods[15]. Further research is  
51 needed on the epidemiology and medical service use of each SP category. Secondly, our results  
52 should be interpreted with caution, as we could not ascertain whether medical service use was  
53  
54  
55  
56  
57  
58  
59  
60



1  
2  
3  
4 due to new incidents of SP or to follow-up. That is, rehospitalizations with the same episodes and  
5 recurrence 60 days before the last treatment were not detected. Although we attempted to select  
6 medical service use due to new incidents of SP by using an operational definition, this may not  
7 have been accurate. Thirdly, our study may be limited by the lack of data on uncovered items  
8 and from patients who were not covered by health insurance. However, in Korea, because 98%  
9 of the total population is covered by health insurance, it seems to be the entire population data.  
10 Existence of uncovered items or indirect medical costs was a limitation in this study. In addition,  
11 as the diagnosis codes in the claim's data that was the basis for identifying the patients may not  
12 be completely accurate [42], it is not clear whether all patients with SP were listed under the  
13 appropriate corresponding diagnosis codes. Lastly, since analysis was performed using NHI data  
14 from 2002, there is a possibility of misclassification of new-onset SP due to SP patients who ever  
15 suffered from SP before 2012.  
16  
17  
18  
19  
20  
21  
22  
23  
24  
25

26 However, despite these limitations, this study provided a detailed record of the epidemiology and  
27 treatment of SP. Our study is significant in that it provides novel information, contributing to an  
28 understanding of SP, a little-understood condition with an increasing prevalence in Korea.  
29  
30

## 31 **CONCLUSION**

32  
33  
34 This study demonstrated the increasing prevalence of SP, higher prevalence of SP in men, and  
35 earlier peak age of SP patients in Korea, and also defined the medical service use characteristics  
36 of patients with SP in Korea. These findings can contribute to the understanding of SP.  
37  
38  
39  
40  
41  
42  
43  
44  
45  
46  
47  
48  
49  
50  
51  
52  
53  
54  
55  
56  
57  
58  
59  
60

## **Acknowledgements**

The authors thank Kyungwon Kang, who conducted data cleaning and initial analyses.

## **Author contributions**

IHH and YJL contributed to the overall conception and design of the study protocol. BJ and DK contributed to the specific study design and data analysis. DK wrote the first draft of the manuscript. BHJ and SHC contributed to interpretation of the analyses and revisions of the final manuscript. All authors gave final approval of the version to be submitted.

## **Funding statement**

This research received no specific grant from any funding agency in the public, commercial or not-for-profit sectors.

## **Competing interest**

No competing interests to declare.

## **Ethics approval**

The study was approved by the Institutional Review Board of Jaseng Hospital of Korean Medicine in Seoul, Korea (JASENG 2018-09-007).

## **Data sharing statement**

The datasets generated and analyzed during the current study are available on the National Health Insurance Sharing Service. NHIS provides support to research activities in various sectors of society, the economy, environment, industry, etc., as well as policy and academic research on the health sector by providing sample cohort databases. The research database consists of five types of databases: a sample cohort database, medical check-up cohort database, elderly cohort database, working women cohort database, and infant medical check-up cohort database. Each

1  
2  
3  
4 cohort database consists of the following four detailed data-sets: qualification database, treatment  
5  
6 database, medical check-up database, and clinic database.  
7  
8

9  
10 The present study utilized the sample cohort database, which is a third-party data not owned by  
11  
12 the authors. The sample cohort database is available upon approval for data sharing, from the  
13  
14 health insurance corporation. For the purpose of policy and academic research a fee is paid to  
15  
16 obtain data from the NHIS website [<https://nhiss.nhis.or.kr/bd/ab/bdaba022eng.do>].  
17  
18  
19  
20  
21  
22  
23  
24  
25  
26  
27  
28  
29  
30  
31  
32  
33  
34  
35  
36  
37  
38  
39  
40  
41  
42  
43  
44  
45  
46  
47  
48  
49  
50  
51  
52  
53  
54  
55  
56  
57  
58  
59  
60

For peer review only

**REFERENCES**

1. Tortora G, Anagnostakos N. Principles of Anatomy and Physiology. New York: Harper & Row 1987.
2. Luh SP. Review: Diagnosis and treatment of primary spontaneous pneumothorax. *J Zhejiang Univ Sci B* 2010;11:735–44 doi:10.1631/jzus.B1000131
3. Imran JB, Eastman AL. Pneumothorax. *Jama* 2017;318:974 doi:10.1001/jama.2017.10476
4. Sahn SAMD, Heffner JE. spontaneous pneumothorax. *N Engl J Med* 2000;342:868–74 doi:10.1056/NEJM200003233421207
5. Melton III LJ, Hepper NG, Offord KP. Incidence of spontaneous pneumothorax in Olmsted County, Minnesota: 1950 to 1974. *Am Rev Respir Dis* 1979;120:1379–82 doi:10.1164/arrd.1979.120.6.1379
6. Gupta D, Hansell A, Nichols T, et al. Epidemiology of pneumothorax in England. *Thorax* 2000;55:666–71 doi:10.1136/thorax.55.8.666
7. Bobbio A, Dechartres A, Bouam S, et al. Epidemiology of spontaneous pneumothorax: gender-related differences. *Thorax* 2015;70:653–8 doi:10.1136/thoraxjnl-2014-206577
8. Schnell J, Koryllos A, Lopez-Pastorini A, et al. Spontaneous Pneumothorax Epidemiology and Treatment in Germany Between 2011 and 2015. *Dtsch Arztebl Int* 2017;114:739 doi:10.3238/arztebl.2017.0739
9. Bense L, Eklund G, Wiman LG. Smoking and the increased risk of contracting spontaneous pneumothorax. *Chest* 1987;92:1009–12 doi:10.1378/chest.92.6.1009
10. Hallifax RJ, Rahman NM. Epidemiology of pneumothorax--finally something solid out of thin air. *Thorax* 2015;70:921–2 doi:10.1136/thoraxjnl-2015-207438

11. Saito Y, Suzuki Y, Demura R, et al. The outcome and risk factors for recurrence and extended hospitalization of secondary spontaneous pneumothorax. *Surg Today* 2018;48:320–24 doi:10.1007/s00595-017-1585-8
12. Tan J, Yang Y, Zhong J, et al. Association Between BMI and Recurrence of Primary Spontaneous Pneumothorax. *World J Surg* 2017;41:1274–80 doi:10.1007/s00268-016-3848-8
13. Kim D, Shin HJ, Kim SW, et al. Psychological Problems of Pneumothorax According to Resilience, Stress, and Post-Traumatic Stress. *Psychiatry Investig* 2017;14:795–800 doi:10.4306/pi.2017.14.6.795
14. Sousa I, Abrantes P, Francisco V, et al. Multicentric Genome-Wide Association Study for Primary Spontaneous Pneumothorax. *PLoS One* 2016;11:e0156103 doi:10.1371/journal.pone.0156103
15. Kepka S, Dalphin JC, Pretalli JB, et al. How spontaneous pneumothorax is managed in emergency departments: a French multicentre descriptive study. *BMC Emerg Med* 2019;19:4 doi:10.1186/s12873-018-0213-2
16. Kwon S. Thirty years of national health insurance in South Korea: lessons for achieving universal health care coverage. *Health Policy Plan* 2009;24:63–71 doi:10.1093/heapol/czn037
17. <http://www.nhis.or.kr/retrieveHomeMain.xx>.
18. Lee J, Lee JS, Park SH, et al. Cohort Profile: The National Health Insurance Service-National Sample Cohort (NHIS-NSC), South Korea. *Int J Epidemiol* 2017;46:e15 doi:10.1093/ije/dyv319
19. Frechette E, Guidolin K, Seyam A, et al. Identifying Primary Spontaneous Pneumothorax from Administrative Databases: A Validation Study. *Can Respir J* 2016;2016:1690482 doi:10.1155/2016/1690482
20. Sundararajan V, Henderson T, Perry C, et al. New ICD-10 version of the Charlson comorbidity index predicted in-hospital mortality. *J Clin Epidemiol* 2004;57:1288–94 doi:10.1016/j.jclinepi.2004.03.012

- 1  
2  
3  
4 21. Bannay A, Chaignot C, Blotiere PO, et al. The Best Use of the Charlson Comorbidity  
5 Index With Electronic Health Care Database to Predict Mortality. *Med Care* 2016;54:188–94  
6 doi:10.1097/mlr.0000000000000471  
7  
8  
9  
10 22. Charlson M, Wells MT, Ullman R, et al. The Charlson comorbidity index can be used  
11 prospectively to identify patients who will incur high future costs. *PLoS One* 2014;9:e112479  
12 doi:10.1371/journal.pone.0112479  
13  
14  
15  
16 23. MacDuff A, Arnold A, Harvey J. Management of spontaneous pneumothorax: British  
17 Thoracic Society Pleural Disease Guideline 2010. *Thorax* 2010;65 Suppl 2:ii18–31  
18 doi:10.1136/thx.2010.136986  
19  
20  
21  
22 24. Skrbo A, Begovic B, Skrbo S. Classification of drugs using the ATC system (Anatomic,  
23 Therapeutic, Chemical Classification) and the latest changes. *Med Arh* 2004;58:138–41  
24  
25  
26  
27 25. Hallifax RJ, Goldacre R, Landray MJ, et al. Trends in the Incidence and Recurrence of  
28 Inpatient-Treated Spontaneous Pneumothorax, 1968-2016. *Jama* 2018;320:1471–80  
29 doi:10.1001/jama.2018.14299  
30  
31  
32  
33 26. Marx T, Bernard N, Parmentier AL, et al. Does air pollution really impact the onset of  
34 spontaneous pneumothorax? A French case-crossover study. *Environ Int* 2019;127:317–23  
35 doi:10.1016/j.envint.2019.01.056  
36  
37  
38  
39 27. Park JH, Lee SH, Yun SJ, et al. Air pollutants and atmospheric pressure increased risk of  
40 ED visit for spontaneous pneumothorax. *Am J Emerg Med* 2018;36:2249–53  
41 doi:10.1016/j.ajem.2018.04.020  
42  
43  
44  
45 28. Heyndrickx M, Le Rochais JP, Icard P, et al. Do atmospheric conditions influence the  
46 first episode of primary spontaneous pneumothorax? *Interact Cardiovasc Thorac Surg*  
47 2015;21:296–300 doi:10.1093/icvts/ivv145  
48  
49  
50  
51 29. Nakamura H, Konishiike J, Sugamura A, et al. Epidemiology of spontaneous  
52 pneumothorax in women. *Chest* 1986;89:378–82 doi:10.1378/chest.89.3.378  
53  
54  
55  
56  
57  
58  
59  
60

- 1  
2  
3  
4 30. Jheon SH, Lee EB, Choe JY, et al. Critical pathway for management of primary  
5 spontaneous pneumothorax. *Korean J Thoracic and Cardiovascular Surg* 2002;35:43–47  
6  
7  
8  
9 31. Sadikot RT, Greene T, Meadows K, et al. Recurrence of primary spontaneous  
10 pneumothorax. *Thorax* 1997;52:805–9 doi:10.1136/thx.52.9.805  
11  
12  
13 32. Aghajanzadeh M, Asgary MR, Delshad MSE, et al. Data on the epidemiology, diagnosis,  
14 and treatment of patients with pneumothorax. *Data Brief* 2018;20:1053–6  
15 doi:10.1016/j.dib.2018.08.063  
16  
17  
18  
19 33. Sjostrom C, Stalenheim G, Janson C. Spontaneous pneumothorax--a study of medical  
20 records. High age is the most significant risk factor of prolonged length of stay. *Lakartidningen*  
21 2002;99:1070–4  
22  
23  
24  
25 34. Kepka S, Dalphin JC, Parmentier AL, et al. Primary Spontaneous Pneumothorax  
26 Admitted in Emergency Unit: Does First Episode Differ from Recurrence? A Cross-Sectional  
27 Study. *Can Respir J* 2017;2017:2729548 doi:10.1155/2017/2729548  
28  
29  
30  
31 35. Huang TW, Lee SC, Cheng YL, et al. Contralateral recurrence of primary spontaneous  
32 pneumothorax. *Chest* 2007;132:1146–50 doi:10.1378/chest.06-2772  
33  
34  
35  
36 36. Kwas H, Zendah I, Ghedira H. Spontaneous pneumothorax secondary to tuberculosis.  
37 *Tunis Med* 2017;95:276–79  
38  
39  
40 37. Iga N, Nishi H, Fujimoto N, et al. Clinical features of secondary spontaneous  
41 pneumothorax complicated with silicosis. *Respir Investig* 2018;56:144–49  
42 doi:10.1016/j.resinv.2017.11.007  
43  
44  
45  
46 38. Onuki T, Ueda S, Yamaoka M, et al. Primary and Secondary Spontaneous  
47 Pneumothorax: Prevalence, Clinical Features, and In-Hospital Mortality. *Can Respir J*  
48 2017;2017:6014967 doi:10.1155/2017/6014967  
49  
50  
51  
52 39. Chee CB, Abisheganaden J, Yeo JK, et al. Persistent air-leak in spontaneous  
53 pneumothorax--clinical course and outcome. *Respir Med* 1998;92:757–61  
54  
55  
56  
57  
58  
59  
60

- 1  
2  
3  
4 40. Cao J, Yuan P, Wang Y, et al. Survival Rates After Lobectomy, Segmentectomy, and  
5 Wedge Resection for Non-Small Cell Lung Cancer. *Ann Thorac Surg* 2018;105:1483–91  
6 doi:10.1016/j.athoracsur.2018.01.032  
7  
8  
9  
10 41. Sihoe AD, Van Schil P. Non-small cell lung cancer: when to offer sublobar resection.  
11 *Lung Cancer* 2014;86:115–20 doi:10.1016/j.lungcan.2014.09.004  
12  
13  
14 42. Kim JA, Yoon S, Kim LY, et al. Towards Actualizing the Value Potential of Korea  
15 Health Insurance Review and Assessment (HIRA) Data as a Resource for Health Research:  
16 Strengths, Limitations, Applications, and Strategies for Optimal Use of HIRA Data. *J Korean*  
17 *Med Sci* 2017;32:718–28 doi:10.3346/jkms.2017.32.5.71  
18  
19  
20  
21  
22  
23  
24  
25  
26  
27  
28  
29  
30  
31  
32  
33  
34  
35  
36  
37  
38  
39  
40  
41  
42  
43  
44  
45  
46  
47  
48  
49  
50  
51  
52  
53  
54  
55  
56  
57  
58  
59  
60



## Figure legends

Fig. 1. Annual prevalence rate of spontaneous pneumothorax, by sex (per 100,000 individuals).

Fig. 2. Annual prevalence rate of spontaneous pneumothorax, by age (per 100,000 individuals).

Fig. 3. Annual prevalence rate of hospitalization due to spontaneous pneumothorax, by sex (per 100,000 individuals).

Fig. 4. Annual prevalence rate of hospitalization due to spontaneous pneumothorax, by age (per 100,000 individuals).

Supplement fig. 1. Prevalence rate of spontaneous pneumothorax by age (per 100,000 individuals).

Supplement fig. 2. Annual prevalence rate of secondary spontaneous pneumothorax, by sex (per 100,000 individuals)

Supplement fig. 3. Annual rate of surgery due to spontaneous pneumothorax, by sex (per 100,000 individuals)

1  
2  
3  
4  
5  
6  
7  
8  
9  
10  
11  
12  
13  
14  
15  
16  
17  
18  
19  
20  
21  
22  
23  
24  
25  
26  
27  
28  
29  
30  
31  
32  
33  
34  
35  
36  
37  
38  
39  
40  
41  
42  
43  
44  
45  
46  
47  
48  
49  
50  
51  
52  
53  
54  
55  
56  
57  
58  
59  
60

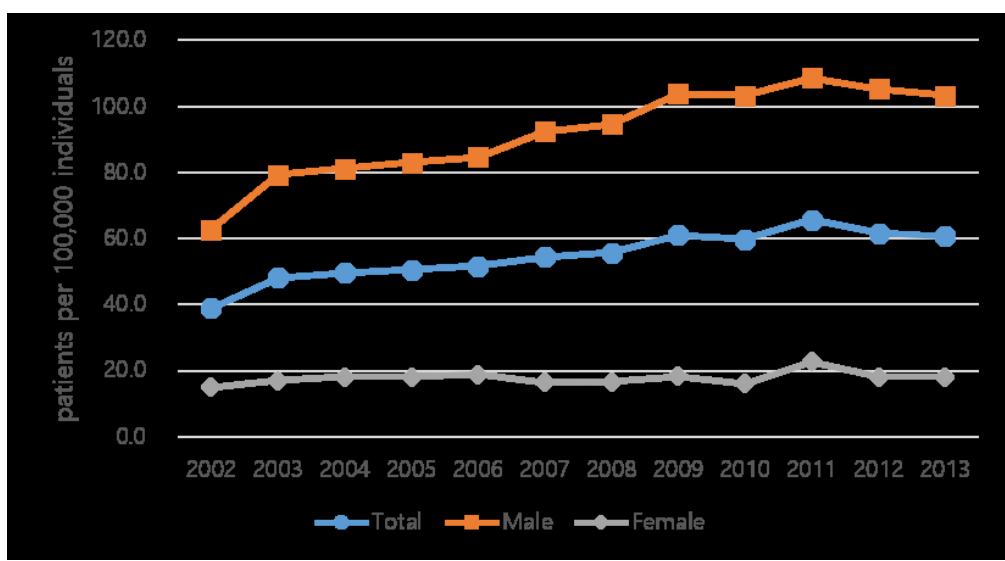

fig1

69x38mm (300 x 300 DPI)

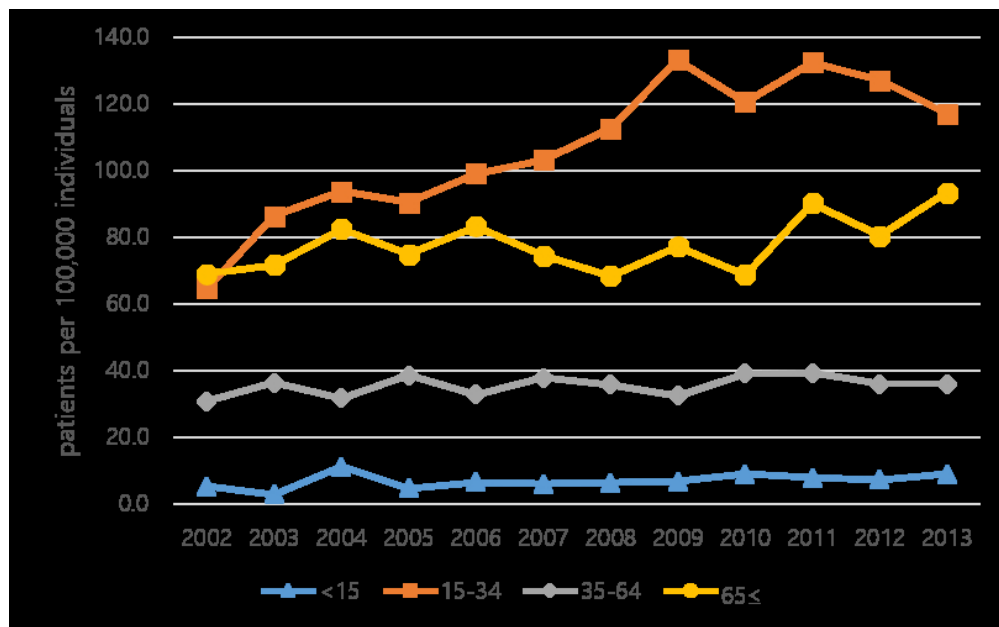

fig2

68x42mm (300 x 300 DPI)

1  
2  
3  
4  
5  
6  
7  
8  
9  
10  
11  
12  
13  
14  
15  
16  
17  
18  
19  
20  
21  
22  
23  
24  
25  
26  
27  
28  
29  
30  
31  
32  
33  
34  
35  
36  
37  
38  
39  
40  
41  
42  
43  
44  
45  
46  
47  
48  
49  
50  
51  
52  
53  
54  
55  
56  
57  
58  
59  
60

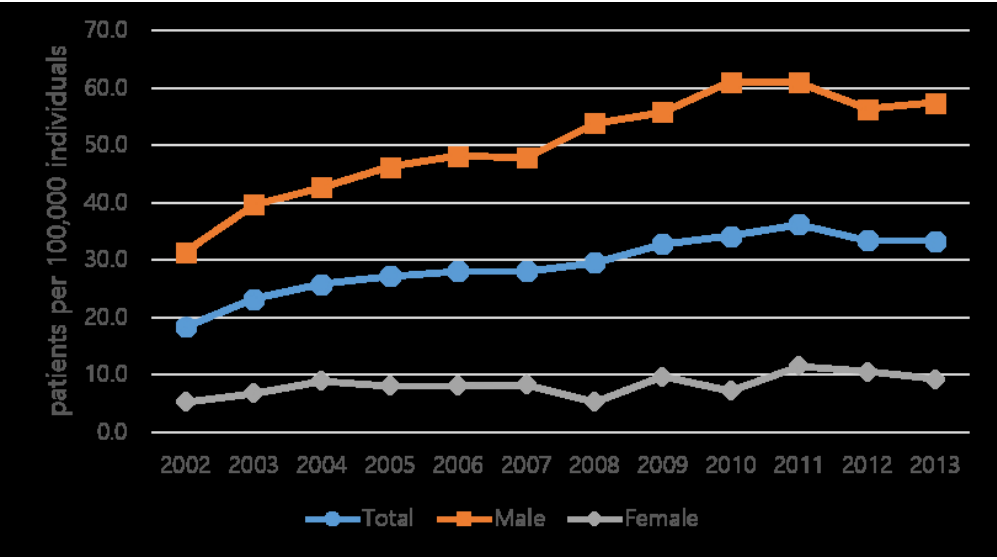

fig3

68x38mm (300 x 300 DPI)

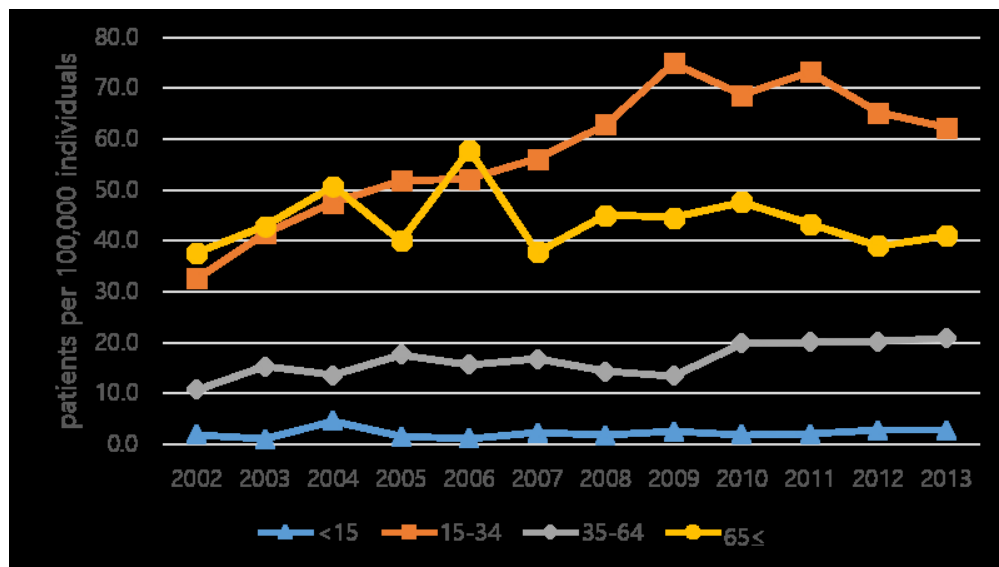

fig4

67x38mm (300 x 300 DPI)

**Supplement Table 1.** ICD-10 codes of comorbidities in spontaneous pneumothorax

| <b>Disease</b>                   | <b>Code</b>                                     |
|----------------------------------|-------------------------------------------------|
| <b>COPD</b>                      | J40*, J41*, J42*, J43*, J44*, J961, J982        |
| <b>Pneumonia</b>                 | J12*, J13*, J14*, J15*, J16*, J18*              |
| <b>Interstitial lung disease</b> | J84*                                            |
| <b>Lung cancer</b>               | C34*, C780*, C783, D022-D024, D143*, D174, D381 |
| <b>Asthma</b>                    | J45*                                            |
| <b>Lung abscess</b>              | J850, J851, J852                                |

ICD-10, International Statistical Classification of Disease and Related Health Problems, 10<sup>th</sup> revision; COPD, Chronic Obstructive Pulmonary Disease

**Supplement Table 2.** Prevalence rate of spontaneous pneumothorax per 100,000 individuals and sociodemographic characteristics

|                          | 2002 |       | 2003 |       | 2004 |       | 2005 |       | 2006 |       | 2007 |       | 2008 |       | 2009 |       | 2010 |       | 2011 |       | 2012 |       | 2013 |       |  |
|--------------------------|------|-------|------|-------|------|-------|------|-------|------|-------|------|-------|------|-------|------|-------|------|-------|------|-------|------|-------|------|-------|--|
|                          | N    | Prev. |  |
| <b>Total SP Patients</b> | 398  | 38.8  | 490  | 48.2  | 504  | 49.6  | 514  | 50.5  | 518  | 51.7  | 555  | 54.4  | 557  | 55.7  | 610  | 61.1  | 598  | 59.7  | 661  | 65.7  | 623  | 61.6  | 616  | 60.7  |  |
| <b>Sex</b>               |      |       |      |       |      |       |      |       |      |       |      |       |      |       |      |       |      |       |      |       |      |       |      |       |  |
| Male                     | 322  | 62.7  | 404  | 79.3  | 412  | 81.1  | 422  | 83.0  | 424  | 84.7  | 471  | 92.4  | 474  | 94.6  | 519  | 103.9 | 518  | 103.3 | 547  | 108.7 | 532  | 105.2 | 524  | 103.3 |  |
| Female                   | 76   | 14.8  | 86   | 16.9  | 92   | 18.1  | 92   | 18.1  | 94   | 18.8  | 84   | 16.4  | 83   | 16.6  | 91   | 18.2  | 80   | 16.0  | 114  | 22.7  | 91   | 18.0  | 92   | 18.1  |  |
| <b>Age</b>               |      |       |      |       |      |       |      |       |      |       |      |       |      |       |      |       |      |       |      |       |      |       |      |       |  |
| < 15                     | 11   | 5.3   | 6    | 3.0   | 22   | 11.2  | 9    | 4.7   | 12   | 6.6   | 11   | 6.2   | 11   | 6.5   | 11   | 6.8   | 14   | 9.0   | 12   | 7.9   | 11   | 7.5   | 13   | 9.1   |  |
| 15–34                    | 220  | 64.8  | 281  | 86.3  | 298  | 93.9  | 281  | 90.4  | 297  | 99.3  | 311  | 103.2 | 328  | 112.6 | 382  | 133.2 | 344  | 120.6 | 376  | 132.4 | 359  | 127.2 | 329  | 117.1 |  |
| 35–64                    | 123  | 30.9  | 147  | 36.4  | 131  | 31.8  | 162  | 38.6  | 139  | 32.9  | 165  | 37.9  | 156  | 35.9  | 143  | 32.5  | 176  | 39.3  | 179  | 39.4  | 165  | 36.0  | 167  | 36.1  |  |
| ≥ 65                     | 55   | 69.1  | 62   | 71.7  | 75   | 82.6  | 71   | 74.8  | 82   | 83.2  | 79   | 74.6  | 73   | 68.4  | 85   | 77.3  | 78   | 68.8  | 106  | 90.3  | 99   | 80.5  | 120  | 93.5  |  |
| <b>Sub-divided Age</b>   |      |       |      |       |      |       |      |       |      |       |      |       |      |       |      |       |      |       |      |       |      |       |      |       |  |
| < 15                     | 11   | 5.3   | 6    | 3.0   | 22   | 11.2  | 9    | 4.7   | 12   | 6.6   | 11   | 6.2   | 11   | 6.5   | 11   | 6.8   | 14   | 9.0   | 12   | 7.9   | 11   | 7.5   | 13   | 9.1   |  |
| 15–19                    | 81   | 114.7 | 96   | 143.2 | 110  | 165.5 | 106  | 160.4 | 111  | 166.2 | 140  | 200.4 | 162  | 231.4 | 193  | 270.2 | 179  | 245.2 | 184  | 254.0 | 156  | 218.9 | 153  | 220.2 |  |
| 20–24                    | 54   | 63.7  | 91   | 109.1 | 71   | 89.2  | 66   | 86.9  | 73   | 104.6 | 71   | 104.9 | 58   | 91.3  | 77   | 122.8 | 77   | 123.2 | 92   | 142.8 | 105  | 156.8 | 93   | 134.6 |  |
| 25–29                    | 41   | 47.6  | 50   | 62.6  | 55   | 70.0  | 55   | 69.6  | 66   | 84.0  | 63   | 77.6  | 58   | 72.1  | 60   | 78.0  | 45   | 61.3  | 46   | 66.4  | 50   | 76.5  | 44   | 70.1  |  |
| 30–34                    | 33   | 33.6  | 38   | 39.9  | 40   | 43.1  | 45   | 50.2  | 35   | 41.6  | 26   | 31.4  | 39   | 50.5  | 41   | 54.1  | 29   | 38.0  | 42   | 53.9  | 37   | 47.1  | 26   | 32.7  |  |
| 35–39                    | 23   | 25.7  | 30   | 33.1  | 28   | 30.5  | 39   | 42.1  | 32   | 34.4  | 34   | 35.9  | 30   | 32.7  | 26   | 29.0  | 41   | 47.3  | 31   | 37.3  | 34   | 42.4  | 33   | 43.2  |  |
| 40–44                    | 19   | 20.0  | 23   | 24.6  | 21   | 22.9  | 26   | 28.9  | 18   | 20.9  | 23   | 26.6  | 21   | 24.2  | 28   | 31.7  | 24   | 26.8  | 30   | 32.9  | 26   | 28.3  | 25   | 27.5  |  |
| 45–49                    | 26   | 35.4  | 22   | 28.4  | 21   | 25.7  | 26   | 30.5  | 20   | 22.7  | 30   | 32.9  | 32   | 35.8  | 24   | 27.3  | 24   | 27.8  | 29   | 34.5  | 15   | 18.0  | 28   | 32.6  |  |
| 50–54                    | 13   | 24.2  | 23   | 42.4  | 22   | 38.8  | 19   | 30.8  | 21   | 31.7  | 26   | 36.9  | 26   | 35.5  | 23   | 29.6  | 26   | 32.0  | 33   | 38.6  | 35   | 40.0  | 25   | 28.4  |  |
| 55–59                    | 21   | 48.4  | 25   | 55.9  | 18   | 38.9  | 25   | 51.5  | 26   | 53.7  | 23   | 44.8  | 26   | 50.9  | 21   | 39.3  | 32   | 54.6  | 29   | 45.4  | 27   | 40.2  | 31   | 43.3  |  |
| 60–64                    | 21   | 48.7  | 24   | 55.1  | 21   | 48.8  | 27   | 64.2  | 22   | 54.0  | 29   | 70.6  | 21   | 50.3  | 21   | 48.5  | 29   | 63.5  | 27   | 58.4  | 28   | 57.8  | 25   | 50.5  |  |
| 65–69                    | 23   | 71.1  | 22   | 64.3  | 30   | 84.4  | 34   | 93.9  | 30   | 80.6  | 32   | 79.4  | 25   | 62.9  | 24   | 61.2  | 26   | 67.3  | 32   | 83.8  | 28   | 73.3  | 30   | 75.4  |  |
| 70–74                    | 16   | 74.4  | 19   | 82.4  | 21   | 85.7  | 15   | 57.0  | 25   | 90.1  | 25   | 85.1  | 24   | 80.2  | 33   | 105.6 | 14   | 43.6  | 22   | 65.5  | 12   | 33.2  | 27   | 73.2  |  |
| ≥ 75                     | 16   | 62.1  | 21   | 72.0  | 24   | 78.1  | 22   | 68.0  | 27   | 80.4  | 22   | 60.8  | 24   | 64.9  | 28   | 70.9  | 38   | 89.1  | 52   | 114.0 | 59   | 121.2 | 63   | 121.8 |  |
| <b>Income</b>            |      |       |      |       |      |       |      |       |      |       |      |       |      |       |      |       |      |       |      |       |      |       |      |       |  |
| Low (0–3)                | 71   | 31.1  | 99   | 43.9  | 116  | 51.3  | 129  | 54.8  | 92   | 39.7  | 125  | 52.0  | 116  | 48.4  | 127  | 54.4  | 117  | 48.8  | 163  | 67.3  | 150  | 68.1  | 170  | 70.3  |  |
| Medium (4–7)             | 164  | 40.9  | 194  | 49.3  | 188  | 48.2  | 190  | 49.4  | 212  | 56.0  | 206  | 53.8  | 213  | 57.3  | 229  | 61.8  | 213  | 58.0  | 237  | 64.7  | 190  | 54.2  | 196  | 53.3  |  |

|   |                           |     |      |     |      |     |      |     |      |     |      |     |      |     |      |     |      |     |      |     |       |     |      |     |       |
|---|---------------------------|-----|------|-----|------|-----|------|-----|------|-----|------|-----|------|-----|------|-----|------|-----|------|-----|-------|-----|------|-----|-------|
| 1 | High (8-10)               | 163 | 41.1 | 197 | 49.5 | 200 | 50.0 | 195 | 49.2 | 214 | 54.6 | 224 | 56.3 | 228 | 58.5 | 254 | 64.4 | 268 | 67.8 | 261 | 65.5  | 283 | 64.2 | 250 | 61.7  |
| 2 | <b>Insurance type</b>     |     |      |     |      |     |      |     |      |     |      |     |      |     |      |     |      |     |      |     |       |     |      |     |       |
| 3 | <b>Region</b>             | 200 | 40.2 | 236 | 49.8 | 206 | 45.8 | 221 | 52.5 | 201 | 52.0 | 214 | 56.4 | 203 | 56.2 | 213 | 61.3 | 200 | 59.8 | 207 | 64.4  | 179 | 57.4 | 161 | 53.8  |
| 4 | <b>Employment</b>         | 195 | 39.3 | 252 | 49.2 | 292 | 54.7 | 285 | 51.1 | 315 | 54.6 | 336 | 55.8 | 346 | 57.6 | 390 | 63.3 | 396 | 62.6 | 419 | 64.4  | 414 | 62.0 | 415 | 60.5  |
| 5 | <b>Medical Assistance</b> | 3   | 9.8  | 2   | 6.3  | 6   | 18.1 | 8   | 21.1 | 2   | 5.1  | 5   | 12.7 | 8   | 20.5 | 7   | 19.8 | 2   | 5.7  | 35  | 103.7 | 30  | 95.8 | 40  | 132.9 |

8  
9 Prevalence Rate

10  
11  
12  
13  
14  
15  
16  
17  
18  
19  
20  
21  
22  
23  
24  
25  
26  
27  
28  
29  
30  
31  
32  
33  
34  
35  
36  
37  
38  
39  
40  
41  
42  
43  
44  
45  
46

For peer review only



**Supplement Table 3.** Annual prevalence rate of hospitalization due to spontaneous pneumothorax (per 100,000 individuals)

| Hospitalization |     |         |             | Sex  |       |            |        |       |            | Age (years) |       |            |       |       |            |       |       |            |      |       |            |  |
|-----------------|-----|---------|-------------|------|-------|------------|--------|-------|------------|-------------|-------|------------|-------|-------|------------|-------|-------|------------|------|-------|------------|--|
|                 |     |         |             | Male |       |            | Female |       |            | < 15        |       |            | 15–34 |       |            | 35–64 |       |            | ≥ 65 |       |            |  |
| Year            | N   | Pre v.* | Gro w. (%)† | N    | Prev. | Grow. (%)† | N      | Prev. | Grow. (%)† | N           | Prev. | Grow. (%)† | N     | Prev. | Grow. (%)† | N     | Prev. | Grow. (%)† | N    | Prev. | Grow. (%)† |  |
| 2002            | 188 | 18.3    |             | 161  | 31.4  |            | 27     | 5.3   |            | 4           | 1.9   |            | 111   | 32.7  |            | 43    | 10.8  |            | 30   | 37.7  |            |  |
| 2003            | 236 | 23.2    | 26.5        | 202  | 39.7  | 26.5       | 34     | 6.7   | 26.9       | 2           | 1.0   | -48.4      | 135   | 41.5  | 26.9       | 62    | 15.3  | 42.0       | 37   | 42.8  | 13.7       |  |
| 2004            | 262 | 25.8    | 11.1        | 217  | 42.7  | 7.6        | 45     | 8.9   | 32.3       | 9           | 4.6   | 360.9      | 151   | 47.6  | 14.7       | 56    | 13.6  | -11.3      | 46   | 50.7  | 18.3       |  |
| 2005            | 276 | 27.1    | 5.3         | 235  | 46.2  | 8.3        | 41     | 8.1   | -8.9       | 3           | 1.6   | -65.7      | 161   | 51.8  | 8.9        | 74    | 17.6  | 29.6       | 38   | 40.1  | -20.9      |  |
| 2006            | 281 | 28.0    | 3.3         | 241  | 48.1  | 4.1        | 40     | 8.0   | -1.0       | 2           | 1.1   | -29.8      | 156   | 52.1  | 0.6        | 66    | 15.6  | -11.3      | 57   | 57.8  | 44.4       |  |
| 2007            | 286 | 28.0    | -0.1        | 244  | 47.8  | -0.6       | 42     | 8.2   | 3.0        | 4           | 2.2   | 103.9      | 169   | 56.1  | 7.5        | 73    | 16.8  | 7.4        | 40   | 37.8  | -34.7      |  |
| 2008            | 296 | 29.6    | 5.6         | 270  | 53.9  | 12.6       | 26     | 5.2   | -36.7      | 3           | 1.8   | -20.7      | 183   | 62.8  | 12.1       | 62    | 14.3  | -14.9      | 48   | 45.0  | 19.1       |  |
| 2009            | 327 | 32.7    | 10.7        | 279  | 55.8  | 3.6        | 48     | 9.6   | 85.0       | 4           | 2.5   | 39.3       | 215   | 74.9  | 19.3       | 59    | 13.4  | -6.1       | 49   | 44.5  | -1.0       |  |
| 2010            | 342 | 34.1    | 4.2         | 306  | 61.0  | 9.3        | 36     | 7.2   | -25.3      | 3           | 1.9   | -22.0      | 196   | 68.7  | -8.3       | 89    | 19.9  | 48.2       | 54   | 47.6  | 6.9        |  |
| 2011            | 364 | 36.2    | 6.0         | 307  | 61.0  | -0.1       | 57     | 11.3  | 57.6       | 3           | 2.0   | 2.7        | 208   | 73.3  | 6.6        | 82    | 20.1  | 1.2        | 71   | 43.4  | -8.9       |  |
| 2012            | 338 | 33.4    | -7.6        | 285  | 56.4  | -7.6       | 53     | 10.5  | -7.5       | 4           | 2.7   | 36.7       | 184   | 65.2  | -11.0      | 83    | 20.2  | 0.7        | 67   | 39.1  | -9.9       |  |
| 2013            | 338 | 33.3    | -0.4        | 291  | 57.4  | 1.8        | 47     | 9.3   | -11.7      | 4           | 2.8   | 2.8        | 175   | 62.3  | -4.5       | 86    | 20.8  | 3.0        | 73   | 41.0  | 5.0        |  |

Prev., \*Prevalence rate: rate of prevalence per 100,000 individuals.

Grow., †Growth rate (%) = (Current Year \*100) / Previous Year) - 100

**Supplement Table 4.** Logistic regression analysis of factors affecting hospitalization rate in spontaneous pneumothorax patients

| Characteristics                     | Hospitalization  |              |                          |              |
|-------------------------------------|------------------|--------------|--------------------------|--------------|
|                                     | Unadjusted OR    | 95% CI       | Adjusted OR <sup>b</sup> | 95% CI       |
| <b>Sex</b>                          |                  |              |                          |              |
| M                                   | 1.39             | (1.23, 1.57) | 1.40                     | (1.24, 1.59) |
| F                                   | 1.0 <sup>a</sup> | -            | 1.0 <sup>a</sup>         | -            |
| <b>Age</b>                          |                  |              |                          |              |
| < 15                                | 0.19             | (0.10, 0.38) | 0.20                     | (0.10, 0.40) |
| 15–34                               | 1.52             | (1.37, 1.69) | 1.48                     | (1.32, 1.64) |
| 35–64                               | 1.0 <sup>a</sup> | -            | 1.0 <sup>a</sup>         | -            |
| ≥ 65                                | 1.74             | (1.52, 1.99) | 1.73                     | (1.51, 1.98) |
| <b>Income range</b>                 |                  |              |                          |              |
| Low (0–3)                           | 1.0 <sup>a</sup> | -            | 1.0 <sup>a</sup>         | -            |
| Medium (4–7)                        | 0.98             | (0.86, 1.11) | 0.97                     | (0.86, 1.10) |
| High (8–10)                         | 0.97             | (0.86, 1.09) | 0.95                     | (0.84, 1.07) |
| <b>Insurance Type</b>               |                  |              |                          |              |
| Region                              | 1.0 <sup>a</sup> | -            | 1.0 <sup>a</sup>         | -            |
| Job                                 | 1.00             | (0.91, 1.10) | 0.99                     | (0.90, 1.09) |
| Medical Assistance                  | 1.60             | (1.17, 2.19) | 1.57                     | (1.15, 2.15) |
| <b>Comorbidities</b><br>(ref. none) |                  |              |                          |              |
| COPD                                | 2.34             | (2.02, 2.72) | 2.38                     | (2.04, 2.77) |
| Pneumonia                           | 2.05             | (1.66, 2.55) | 2.08                     | (1.67, 2.59) |
| Interstitial                        | 3.77             | (1.66, 8.59) | 3.87                     | (1.69, 8.84) |
| Lung cancer                         | 2.14             | (1.53, 2.99) | 2.16                     | (1.54, 3.04) |
| Asthma                              | 2.03             | (1.63, 2.52) | 2.08                     | (1.67, 2.60) |
| Lung abscess                        | 1.09             | (0.29, 4.07) | 1.02                     | (0.27, 3.79) |

OR; odds ratio, CI; confidence intervals; M, male; F, female; COPD, chronic obstructive pulmonary disease  
a; reference group, b: adjusted for age and sex

**Supplement Table 5.** Rehospitalization of spontaneous pneumothorax patients

| Rehospitalization<br>(within)                | Number of<br>rehospitalizations |              | Number of hospitalizations per person |       |         |         |  |
|----------------------------------------------|---------------------------------|--------------|---------------------------------------|-------|---------|---------|--|
|                                              | N*                              | Cumulative % | Mean                                  | SD    | Minimum | Maximum |  |
| 6 months                                     | 1,022                           | 60.7         | 1.34                                  | 0.70  | 1       | 10      |  |
| 1 year                                       | 1,202                           | 71.4         | 1.40                                  | 0.80  | 1       | 12      |  |
| 2 years                                      | 1,412                           | 83.9         | 1.47                                  | 0.94  | 1       | 19      |  |
| Total                                        | 1,683                           | 100.0        | 1.56                                  | 1.07  | 1       | 19      |  |
| <b>Interval between<br/>hospitalizations</b> |                                 |              | 223.07                                | 445.3 | 0       | 3,989   |  |

\*N = Cumulative frequency; SD, standard deviation

1  
2  
3  
4  
5  
6  
7  
8  
9  
10  
11  
12  
13  
14  
15  
16  
17  
18  
19  
20  
21  
22  
23  
24  
25  
26  
27  
28  
29  
30  
31  
32  
33  
34  
35  
36  
37  
38  
39  
40  
41  
42  
43  
44  
45  
46  
47  
48  
49  
50  
51  
52  
53  
54  
55  
56  
57  
58  
59  
60

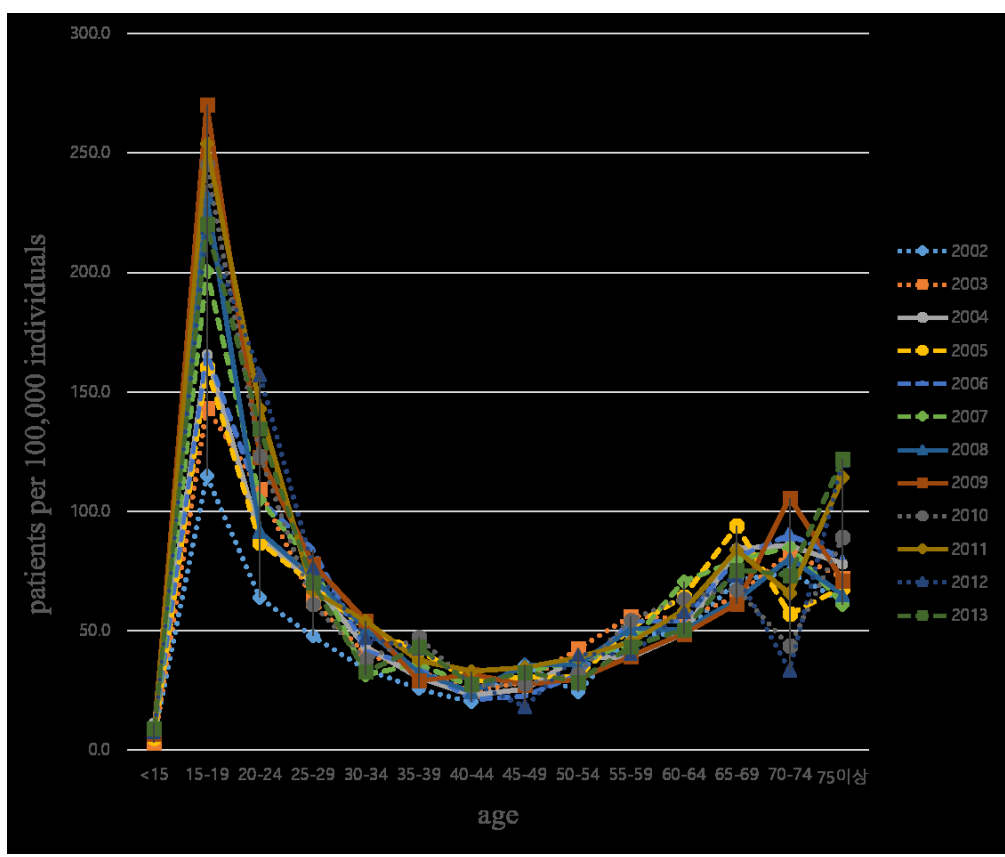

supplement\_fig.1

190x160mm (150 x 150 DPI)

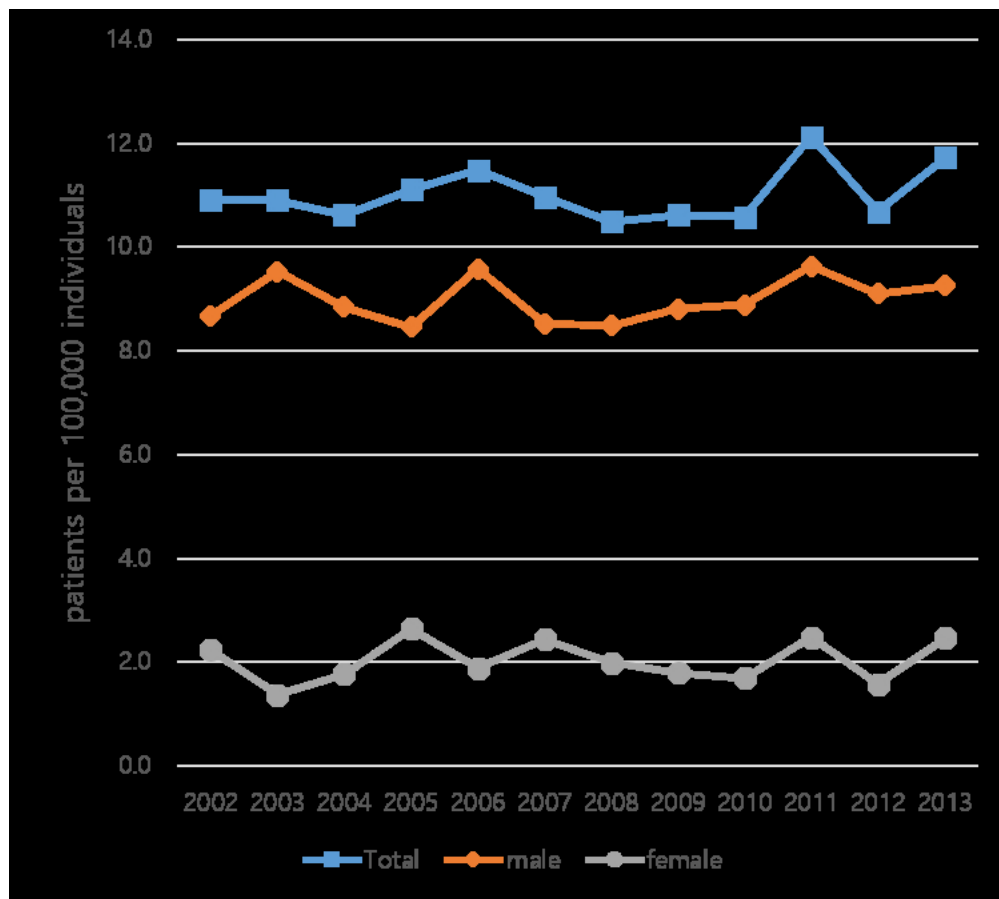

supplement\_fig.2

63x56mm (300 x 300 DPI)

1  
2  
3  
4  
5  
6  
7  
8  
9  
10  
11  
12  
13  
14  
15  
16  
17  
18  
19  
20  
21  
22  
23  
24  
25  
26  
27  
28  
29  
30  
31  
32  
33  
34  
35  
36  
37  
38  
39  
40  
41  
42  
43  
44  
45  
46  
47  
48  
49  
50  
51  
52  
53  
54  
55  
56  
57  
58  
59  
60

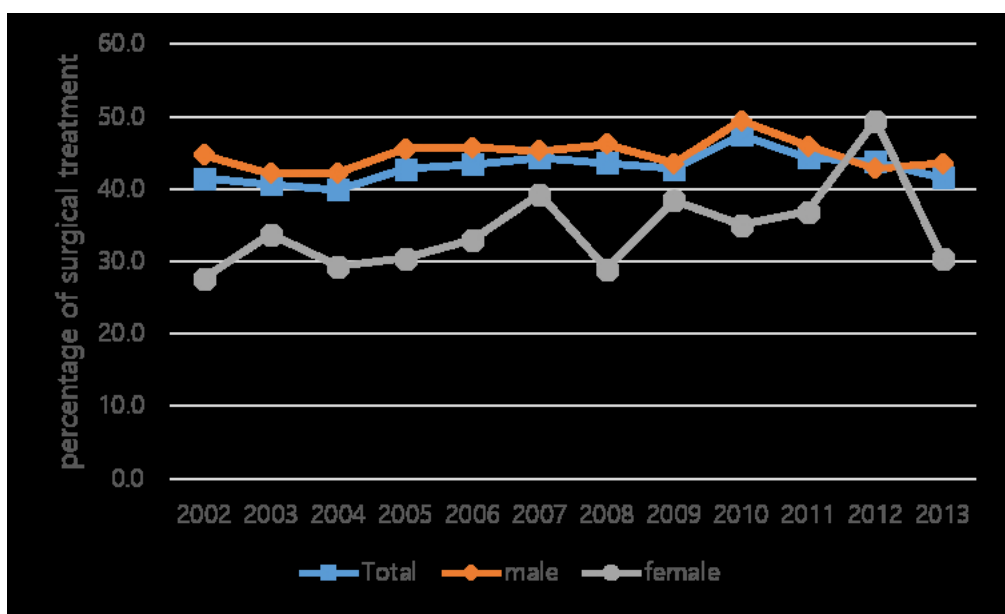

supplement\_fig.3

63x38mm (300 x 300 DPI)

**The RECORD statement – checklist of items, extended from the STROBE statement, that should be reported in observational studies using routinely collected health data.**

|                           | Item No. | STROBE items                                                                                                                                                                               | Location in manuscript where items are reported  | RECORD items                                                                                                                                                                                                                                                                                                                                                                                                                                | Location in manuscript where items are reported                                                                 |
|---------------------------|----------|--------------------------------------------------------------------------------------------------------------------------------------------------------------------------------------------|--------------------------------------------------|---------------------------------------------------------------------------------------------------------------------------------------------------------------------------------------------------------------------------------------------------------------------------------------------------------------------------------------------------------------------------------------------------------------------------------------------|-----------------------------------------------------------------------------------------------------------------|
| <b>Title and abstract</b> |          |                                                                                                                                                                                            |                                                  |                                                                                                                                                                                                                                                                                                                                                                                                                                             |                                                                                                                 |
|                           | 1        | (a) Indicate the study's design with a commonly used term in the title or the abstract (b) Provide in the abstract an informative and balanced summary of what was done and what was found | (a) P1L1(title), P2L5(abstract)<br>(b) P2L1-P2L1 | RECORD 1.1: The type of data used should be specified in the title or abstract. When possible, the name of the databases used should be included.<br><br>RECORD 1.2: If applicable, the geographic region and timeframe within which the study took place should be reported in the title or abstract.<br><br>RECORD 1.3: If linkage between databases was conducted for the study, this should be clearly stated in the title or abstract. | 1.1 P1L2(title), P2L6(abstract)<br>1.2 P1L2(title), P2L8(abstract)<br>1.3 There is no linkage between databases |
| <b>Introduction</b>       |          |                                                                                                                                                                                            |                                                  |                                                                                                                                                                                                                                                                                                                                                                                                                                             |                                                                                                                 |
| Background rationale      | 2        | Explain the scientific background and rationale for the investigation being reported                                                                                                       | P4L9-L19                                         |                                                                                                                                                                                                                                                                                                                                                                                                                                             |                                                                                                                 |
| Objectives                | 3        | State specific objectives, including any prespecified hypotheses                                                                                                                           | P4L20-L24                                        |                                                                                                                                                                                                                                                                                                                                                                                                                                             |                                                                                                                 |
| <b>Methods</b>            |          |                                                                                                                                                                                            |                                                  |                                                                                                                                                                                                                                                                                                                                                                                                                                             |                                                                                                                 |
| Study Design              | 4        | Present key elements of study design early in the paper                                                                                                                                    | P5L2-L11                                         |                                                                                                                                                                                                                                                                                                                                                                                                                                             |                                                                                                                 |
| Setting                   | 5        | Describe the setting, locations, and relevant dates, including periods of recruitment, exposure, follow-up, and data collection                                                            | P5L12-L20                                        |                                                                                                                                                                                                                                                                                                                                                                                                                                             |                                                                                                                 |

|                                                                                                                                                                                                            |          |                                                                                                                                                                                                                                                                                                                                                                                                                                                                                                                                                                                                                                                                                                                        |                                                                        |                                                                                                                                                                                                                                                                                                                                                                                                                                                                                                                                                                                                                                                                                                      |                                                                                                                                                                                        |
|------------------------------------------------------------------------------------------------------------------------------------------------------------------------------------------------------------|----------|------------------------------------------------------------------------------------------------------------------------------------------------------------------------------------------------------------------------------------------------------------------------------------------------------------------------------------------------------------------------------------------------------------------------------------------------------------------------------------------------------------------------------------------------------------------------------------------------------------------------------------------------------------------------------------------------------------------------|------------------------------------------------------------------------|------------------------------------------------------------------------------------------------------------------------------------------------------------------------------------------------------------------------------------------------------------------------------------------------------------------------------------------------------------------------------------------------------------------------------------------------------------------------------------------------------------------------------------------------------------------------------------------------------------------------------------------------------------------------------------------------------|----------------------------------------------------------------------------------------------------------------------------------------------------------------------------------------|
| <p>1<br/>2<br/>3<br/>4<br/>5<br/>6<br/>7<br/>8<br/>9<br/>10<br/>11<br/>12<br/>13<br/>14<br/>15<br/>16<br/>17<br/>18<br/>19<br/>20<br/>21<br/>22<br/>23<br/>24<br/>25<br/>26<br/>27</p> <p>Participants</p> | <p>6</p> | <p>(a) <i>Cohort study</i> - Give the eligibility criteria, and the sources and methods of selection of participants. Describe methods of follow-up<br/> <i>Case-control study</i> - Give the eligibility criteria, and the sources and methods of case ascertainment and control selection. Give the rationale for the choice of cases and controls<br/> <i>Cross-sectional study</i> - Give the eligibility criteria, and the sources and methods of selection of participants</p> <p>(b) <i>Cohort study</i> - For matched studies, give matching criteria and number of exposed and unexposed<br/> <i>Case-control study</i> - For matched studies, give matching criteria and the number of controls per case</p> | <p>(a)P5L12-L20<br/>                 (b)This is no matched studies</p> | <p>RECORD 6.1: The methods of study population selection (such as codes or algorithms used to identify subjects) should be listed in detail. If this is not possible, an explanation should be provided.</p> <p>RECORD 6.2: Any validation studies of the codes or algorithms used to select the population should be referenced. If validation was conducted for this study and not published elsewhere, detailed methods and results should be provided.</p> <p>RECORD 6.3: If the study involved linkage of databases, consider use of a flow diagram or other graphical display to demonstrate the data linkage process, including the number of individuals with linked data at each stage.</p> | <p>6.1 P5L2-L11, P5L12-17<br/>                 6.2 P5L2-L11, P5L12-17<br/>                 6.3 There is no linkage between databases</p>                                               |
| <p>28<br/>29<br/>30<br/>31<br/>32<br/>33<br/>34<br/>35<br/>36<br/>37<br/>38</p> <p>Variables</p>                                                                                                           | <p>7</p> | <p>Clearly define all outcomes, exposures, predictors, potential confounders, and effect modifiers. Give diagnostic criteria, if applicable.</p>                                                                                                                                                                                                                                                                                                                                                                                                                                                                                                                                                                       | <p>P5L21-P9L3</p>                                                      | <p>RECORD 7.1: A complete list of codes and algorithms used to classify exposures, outcomes, confounders, and effect modifiers should be provided. If these cannot be reported, an explanation should be provided.</p>                                                                                                                                                                                                                                                                                                                                                                                                                                                                               | <p>In this study, only J93 patients were considered out of the data of the entire population from the start, and no confounders. Explanations of other outcomes are in P5L21-P9L3.</p> |
| <p>39<br/>40<br/>41<br/>42<br/>43<br/>44</p> <p>Data sources/<br/>measurement</p>                                                                                                                          | <p>8</p> | <p>For each variable of interest, give sources of data and details of methods of assessment (measurement).</p>                                                                                                                                                                                                                                                                                                                                                                                                                                                                                                                                                                                                         | <p>P5L21-P9L3</p>                                                      |                                                                                                                                                                                                                                                                                                                                                                                                                                                                                                                                                                                                                                                                                                      |                                                                                                                                                                                        |



|                                  |    |                                                                                                                                                                                                                                                                                                                                                                                                                                                                                                                                                                      |                         |                                                                                                                                                       |                            |
|----------------------------------|----|----------------------------------------------------------------------------------------------------------------------------------------------------------------------------------------------------------------------------------------------------------------------------------------------------------------------------------------------------------------------------------------------------------------------------------------------------------------------------------------------------------------------------------------------------------------------|-------------------------|-------------------------------------------------------------------------------------------------------------------------------------------------------|----------------------------|
|                                  |    | Describe comparability of assessment methods if there is more than one group                                                                                                                                                                                                                                                                                                                                                                                                                                                                                         |                         |                                                                                                                                                       |                            |
| Bias                             | 9  | Describe any efforts to address potential sources of bias                                                                                                                                                                                                                                                                                                                                                                                                                                                                                                            | P5L7-L11                |                                                                                                                                                       |                            |
| Study size                       | 10 | Explain how the study size was arrived at                                                                                                                                                                                                                                                                                                                                                                                                                                                                                                                            | P5L2-L11                |                                                                                                                                                       |                            |
| Quantitative variables           | 11 | Explain how quantitative variables were handled in the analyses. If applicable, describe which groupings were chosen, and why                                                                                                                                                                                                                                                                                                                                                                                                                                        | P5L25-P6L2<br>P6L27-L28 |                                                                                                                                                       |                            |
| Statistical methods              | 12 | (a) Describe all statistical methods, including those used to control for confounding<br>(b) Describe any methods used to examine subgroups and interactions<br>(c) Explain how missing data were addressed<br>(d) <i>Cohort study</i> - If applicable, explain how loss to follow-up was addressed<br><i>Case-control study</i> - If applicable, explain how matching of cases and controls was addressed<br><i>Cross-sectional study</i> - If applicable, describe analytical methods taking account of sampling strategy<br>(e) Describe any sensitivity analyses | P8L21-P9L3              |                                                                                                                                                       |                            |
| Data access and cleaning methods |    | ..                                                                                                                                                                                                                                                                                                                                                                                                                                                                                                                                                                   |                         | RECORD 12.1: Authors should describe the extent to which the investigators had access to the database population used to create the study population. | 12.1 P5L2-L11<br>12.2 P9L2 |

|                  |    |                                                                                                                                                                                                                                                                                                                                                 |                                                                                                                                                                                     |                                                                                                                                                                                                                                                                                                                    |                                                                                                                                                                    |
|------------------|----|-------------------------------------------------------------------------------------------------------------------------------------------------------------------------------------------------------------------------------------------------------------------------------------------------------------------------------------------------|-------------------------------------------------------------------------------------------------------------------------------------------------------------------------------------|--------------------------------------------------------------------------------------------------------------------------------------------------------------------------------------------------------------------------------------------------------------------------------------------------------------------|--------------------------------------------------------------------------------------------------------------------------------------------------------------------|
|                  |    |                                                                                                                                                                                                                                                                                                                                                 |                                                                                                                                                                                     | RECORD 12.2: Authors should provide information on the data cleaning methods used in the study.                                                                                                                                                                                                                    |                                                                                                                                                                    |
| Linkage          |    | ..                                                                                                                                                                                                                                                                                                                                              |                                                                                                                                                                                     | RECORD 12.3: State whether the study included person-level, institutional-level, or other data linkage across two or more databases. The methods of linkage and methods of linkage quality evaluation should be provided.                                                                                          | none                                                                                                                                                               |
| <b>Results</b>   |    |                                                                                                                                                                                                                                                                                                                                                 |                                                                                                                                                                                     |                                                                                                                                                                                                                                                                                                                    |                                                                                                                                                                    |
| Participants     | 13 | (a) Report the numbers of individuals at each stage of the study ( <i>e.g.</i> , numbers potentially eligible, examined for eligibility, confirmed eligible, included in the study, completing follow-up, and analysed)<br>(b) Give reasons for non-participation at each stage.<br>(c) Consider use of a flow diagram                          | P9L9, Table 1<br>In this study, only J93 patients were considered out of the data of the entire population from the start, Thus, it was quite difficult for us to draw a flowchart. | RECORD 13.1: Describe in detail the selection of the persons included in the study ( <i>i.e.</i> , study population selection) including filtering based on data quality, data availability and linkage. The selection of included persons can be described in the text and/or by means of the study flow diagram. | In this study, only J93 patients were considered out of the data of the entire population from the start, Thus, it was quite difficult for us to draw a flowchart. |
| Descriptive data | 14 | (a) Give characteristics of study participants ( <i>e.g.</i> , demographic, clinical, social) and information on exposures and potential confounders<br>(b) Indicate the number of participants with missing data for each variable of interest<br>(c) <i>Cohort study</i> - summarise follow-up time ( <i>e.g.</i> , average and total amount) | (a)P9L10<br>(b)none missing data                                                                                                                                                    |                                                                                                                                                                                                                                                                                                                    |                                                                                                                                                                    |
| Outcome data     | 15 | <i>Cohort study</i> - Report numbers of outcome events or summary measures over time                                                                                                                                                                                                                                                            | P10L2-P19L3                                                                                                                                                                         |                                                                                                                                                                                                                                                                                                                    |                                                                                                                                                                    |

|                   |    |                                                                                                                                                                                                                                                                                                                                                                                                                                |                                                    |                                                                                                                                                                                                                                                                                                          |                |
|-------------------|----|--------------------------------------------------------------------------------------------------------------------------------------------------------------------------------------------------------------------------------------------------------------------------------------------------------------------------------------------------------------------------------------------------------------------------------|----------------------------------------------------|----------------------------------------------------------------------------------------------------------------------------------------------------------------------------------------------------------------------------------------------------------------------------------------------------------|----------------|
|                   |    | <p><i>Case-control study</i> - Report numbers in each exposure category, or summary measures of exposure</p> <p><i>Cross-sectional study</i> - Report numbers of outcome events or summary measures</p>                                                                                                                                                                                                                        |                                                    |                                                                                                                                                                                                                                                                                                          |                |
| Main results      | 16 | <p>(a) Give unadjusted estimates and, if applicable, confounder-adjusted estimates and their precision (e.g., 95% confidence interval). Make clear which confounders were adjusted for and why they were included</p> <p>(b) Report category boundaries when continuous variables were categorized</p> <p>(c) If relevant, consider translating estimates of relative risk into absolute risk for a meaningful time period</p> | This is descriptive study, so it is not applicable |                                                                                                                                                                                                                                                                                                          |                |
| Other analyses    | 17 | Report other analyses done—e.g., analyses of subgroups and interactions, and sensitivity analyses                                                                                                                                                                                                                                                                                                                              |                                                    |                                                                                                                                                                                                                                                                                                          |                |
| <b>Discussion</b> |    |                                                                                                                                                                                                                                                                                                                                                                                                                                |                                                    |                                                                                                                                                                                                                                                                                                          |                |
| Key results       | 18 | Summarise key results with reference to study objectives                                                                                                                                                                                                                                                                                                                                                                       | P21L2, P22L1, P22L8, P22L26,                       |                                                                                                                                                                                                                                                                                                          |                |
| Limitations       | 19 | Discuss limitations of the study, taking into account sources of potential bias or imprecision. Discuss both direction and magnitude of any potential bias                                                                                                                                                                                                                                                                     | P23L21-P24L8                                       | RECORD 19.1: Discuss the implications of using data that were not created or collected to answer the specific research question(s). Include discussion of misclassification bias, unmeasured confounding, missing data, and changing eligibility over time, as they pertain to the study being reported. | Not applicable |

|                                  |                                                           |    |                                                                                                                                                                            |            |                                                                                                                                                          |              |
|----------------------------------|-----------------------------------------------------------|----|----------------------------------------------------------------------------------------------------------------------------------------------------------------------------|------------|----------------------------------------------------------------------------------------------------------------------------------------------------------|--------------|
| 1<br>2<br>3<br>4<br>5<br>6<br>7  | Interpretation                                            | 20 | Give a cautious overall interpretation of results considering objectives, limitations, multiplicity of analyses, results from similar studies, and other relevant evidence | P23L25-L30 |                                                                                                                                                          |              |
| 8<br>9<br>10<br>11               | Generalisability                                          | 21 | Discuss the generalisability (external validity) of the study results                                                                                                      | P24L9-L11  |                                                                                                                                                          |              |
| 12                               | <b>Other Information</b>                                  |    |                                                                                                                                                                            |            |                                                                                                                                                          |              |
| 13<br>14<br>15<br>16<br>17<br>18 | Funding                                                   | 22 | Give the source of funding and the role of the funders for the present study and, if applicable, for the original study on which the present article is based              | P25L8-L10  |                                                                                                                                                          |              |
| 19<br>20<br>21<br>22<br>23<br>24 | Accessibility of protocol, raw data, and programming code |    | ..                                                                                                                                                                         |            | RECORD 22.1: Authors should provide information on how to access any supplemental information such as the study protocol, raw data, or programming code. | P25L16-P26L6 |

\*Reference: Benchimol EI, Smeeth L, Guttman A, Harron K, Moher D, Petersen I, Sørensen HT, von Elm E, Langan SM, the RECORD Working Committee. The REporting of studies Conducted using Observational Routinely-collected health Data (RECORD) Statement. *PLoS Medicine* 2015; in press.

\*Checklist is protected under Creative Commons Attribution ([CC BY](https://creativecommons.org/licenses/by/4.0/)) license.

# BMJ Open

## Epidemiology and Medical Service Use for Spontaneous Pneumothorax: A 12-year Study Using Nationwide Cohort Data in Korea

|                                 |                                                                                                                                                                                                                                                                                                                                                                   |
|---------------------------------|-------------------------------------------------------------------------------------------------------------------------------------------------------------------------------------------------------------------------------------------------------------------------------------------------------------------------------------------------------------------|
| Journal:                        | <i>BMJ Open</i>                                                                                                                                                                                                                                                                                                                                                   |
| Manuscript ID                   | bmjopen-2018-028624.R2                                                                                                                                                                                                                                                                                                                                            |
| Article Type:                   | Research                                                                                                                                                                                                                                                                                                                                                          |
| Date Submitted by the Author:   | 23-Jul-2019                                                                                                                                                                                                                                                                                                                                                       |
| Complete List of Authors:       | Kim, Doori; Jaseng Spine and Joint Research Institute<br>Jung, boyoung; Jaseng Spine and Joint Research Institute<br>Jang, Bo-Hyoung; Department of Preventive Medicine<br>Chung, Seol Hee ; Health Insurance Review & Assessment Service<br>Lee, Yoon Jae ; Jaseng Spine and Joint Research Institute<br>Ha, In-Hyuk ; Jaseng Spine and Joint Research Institute |
| <b>Primary Subject Heading</b>: | Epidemiology                                                                                                                                                                                                                                                                                                                                                      |
| Secondary Subject Heading:      | Epidemiology                                                                                                                                                                                                                                                                                                                                                      |
| Keywords:                       | EPIDEMIOLOGY, Longitudinal cohort, National Health Insurance Service-Sample Cohort Database (NHIS-SCD), Prevalence, Primary Spontaneous Pneumothorax                                                                                                                                                                                                              |
|                                 |                                                                                                                                                                                                                                                                                                                                                                   |

SCHOLARONE™  
Manuscripts

1  
2  
3  
4 **1 Epidemiology and Medical Service Use for Spontaneous Pneumothorax: A 12-year**  
5 **2 Study Using Nationwide Cohort Data in Korea**  
6  
7  
8  
9

10  
11 4 Doori Kim<sup>1,2</sup>, Boyoung Jung<sup>1</sup>, Bo-Hyoung Jang<sup>3</sup>, Seol Hee Chung<sup>4</sup>, Yoon Jae Lee<sup>1\*</sup>, In-Hyuk  
12 5 Ha<sup>1\*</sup>  
13  
14

15 6 <sup>1</sup>Jaseng Spine and Joint Research Institute, Jaseng Medical Foundation, 3F 538 Gangnam-  
16 7 daero, Gangnam-gu, Seoul, Republic of Korea  
17  
18

19 8 <sup>2</sup>Department of Korean Preventive Medicine, College of Korean Medicine, Graduate School,  
20 9 Kyung Hee University, Hoegi-dong, Dongdaemun-gu, Seoul, 130-701, Republic of Korea  
21  
22

23 10 <sup>3</sup>Department of Preventive Medicine, College of Korean Medicine, Kyung Hee University,  
24 11 Hoegi-dong, Dongdaemun-gu, Seoul, 02447, Republic of Korea  
25  
26

27 12 <sup>4</sup>Department of Research, Health Insurance Review & Assessment Service, 60 Hyeoksin-ro  
28 13 (Bangok-dong), Wonju-si, Gangwon-do 26465, South Korea  
29  
30  
31

32 14  
33  
34 15 \*Correspondence should be addressed to: [hanihata@jaseng.org](mailto:hanihata@jaseng.org)(In-HyukHa) and  
35 16 [goodsmile@jaseng.org](mailto:goodsmile@jaseng.org) (Yoon Jae Lee)  
36  
37

38 17 In-Hyuk Ha  
39  
40

41 18 Jaseng Spine and Joint Research Institute, Jaseng Medical Foundation, 3F 538 Gangnam-  
42 19 daero, Gangnam-gu, Seoul, Republic of Korea  
43  
44

45 20 Tel: +82-2-2222-2740  
46  
47

48 21 Fax: +82-2-2222-2737  
49  
50

51 22 Mobile: +82-10-6659-4910  
52  
53

54 23 Email: [hanihata@jaseng.org](mailto:hanihata@jaseng.org)  
55  
56

57 24  
58  
59  
60

## 1 ABSTRACT

2 **Objectives:** This study aimed to promote an understanding of spontaneous pneumothorax by  
3 analyzing the prevalence rate and medical service use by patients with spontaneous  
4 pneumothorax according to sociodemographic characteristics.

5 **Design:** A 12-year nationwide study.

6 **Setting:** Data obtained from the Korean National Health Insurance Service Sharing Service.

7 **Participants:** A total of 4658 participants who used medical services due to spontaneous  
8 pneumothorax between 2002 and 2013 in Korea.

9 **Outcome measures:** For those diagnosed with spontaneous pneumothorax, the use of medical  
10 services, hospitalization data, sociodemographics, co-morbidity, treatment administered, and  
11 medication prescribed were recorded.

12 **Results:** The annual prevalence of spontaneous pneumothorax ranged from 39 to 66 per  
13 100,000 individuals, while the prevalence of hospitalization due to spontaneous  
14 pneumothorax ranged from 18 to 36 per 100,000 individuals. The prevalence rate of  
15 spontaneous pneumothorax in Korea has increased since 2002. The male-to-female ratio was  
16 approximately 4–10:1, with a higher prevalence rate in males. By age, the 15–34-year-old  
17 group, and particularly 15–19-year-olds, showed the highest prevalence rate; the rate then  
18 declined before increasing again for those aged 65 years or older. In total, 47–57% of  
19 spontaneous pneumothorax patients underwent hospitalization. The average number of  
20 rehospitalizations due to pneumothorax was 1.56 per person, and more than 70% of  
21 recurrences occurred within 1 year. Chronic obstructive pulmonary disease (COPD) was the  
22 most common comorbidity. The average treatment period was 11 days as an outpatient and  
23 14 days in-hospital. The average medical costs were \$94.50 for outpatients and \$2523 for  
24 hospital admissions. The most common treatment for spontaneous pneumothorax was oxygen  
25 inhalation and thoracostomy, and the most commonly prescribed medications were  
26 analgesics, antitussives, and antibiotics.

27 **Conclusions:** We here detailed the epidemiology and treatments for spontaneous

1 pneumothorax in Korea. This information can contribute to the understanding of spontaneous  
2 pneumothorax.

3 **Keywords:** Epidemiology, Longitudinal cohort, National Health Insurance Service-Sample  
4 Cohort Database (NHIS-SCD); Prevalence; Primary Spontaneous Pneumothorax

## 6 **STRENGTHS AND LIMITATIONS OF THIS STUDY**

- 7 • Large-scale, long-term (12 years) follow-up data sets, representing the Korean  
8 population, were analyzed.
- 9 • Not only the inpatient costs but also the outpatient costs of spontaneous  
10 pneumothorax treatment were calculated.
- 11 • Data on detailed medical-service use, such as medication, procedures, surgery  
12 undertaken due to spontaneous pneumothorax, were recorded and analyzed.
- 13 • Due to a lack of relevant information in the claims data (for example, medical  
14 treatments are not necessarily covered by insurance), not all relevant treatments data  
15 could be considered.
- 16 • This study could not distinguish whether medical service use was due to new  
17 occurrences or follow-up of existing spontaneous pneumothorax.



## 1 INTRODUCTION

2 The pulmonary system is important because it plays a crucial role in the oxygenation of the  
3 blood.[1] In pneumothorax, air or gas pools in the inter-pleural cavity,[2] leading to lung  
4 collapse and impaired pulmonary function.[3] Pneumothorax is categorized into spontaneous  
5 pneumothorax (SP) or traumatic pneumothorax, depending on etiology, and SP is  
6 subcategorized into primary spontaneous pneumothorax (PSP), occurring in the absence of  
7 underlying lung-related comorbidities, and secondary spontaneous pneumothorax (SSP),  
8 occurring in the presence of underlying lung-related comorbidities.[4]

9 The prevalence rate of SP per 100,000 individuals reportedly ranges from 1.2 to 9.8 in  
10 women to 7.4 to 24.0 in men; the prevalence rate of hospitalized SP per 100,000 individuals  
11 is about 17 to 22 in men, 6 to 7 in women, and 14 to 23 overall.[5-9] Although SP has a  
12 relatively low prevalence rate, it is clinically important,[10] as relapse rates are high (20–  
13 40%, depending on duration);[7, 11, 12] hospitalization is often required influencing work  
14 productivity. Furthermore, pneumothorax patients may be at high risk of stress.[13]

15 However, there is a paucity of research on SP.[14] There is a lack of knowledge about the  
16 modalities of management and the treatments of SP.[15] Given its low prevalence rate, large-  
17 scale research at a national scale is needed to evaluate the epidemiology of SP. Although  
18 large-scale studies have been performed in the UK, France, and Germany, these have  
19 provided limited epidemiological information.[6-8]

20 Thus, we aimed to determine the prevalence rate of SP and medical service use of patients  
21 treated for SP, according to sociodemographic characteristics, by implementing the National  
22 Sample Cohort (NSC) data from the National Health Insurance Service (NHIS) of Korea, to  
23 reformulate a more accurate understanding of the prevalence, treatment, and management of  
24 SP in Korea.

25

26

## 1 **METHODS**

### 2 **Database**

3 Twelve years of NHIS-NSC data (for the period 2002–2013) were analyzed. The National  
4 Health Insurance (NHI) system in Korea is a single-payer system to which 98% of citizens  
5 belong. Under this system, a medical provider requests reimbursement from a third-person  
6 payer (the NHIS) when a patient uses a medical service.[16, 17] The NHIS-NSC is a  
7 population-based cohort built by the NHIS. In 2002, a cohort was extracted by systematic  
8 stratified random sampling from a pool of 47,851,928 individuals, excluding those who were  
9 not enrolled in the NHI (income level of 0) and foreigners.[18] The cohort comprised of  
10 1,476 levels, based on sex, age, and income. Finally, 2.2% of this pool (1,025,340  
11 individuals) were extracted and data from newborns were added each year to maintain the  
12 sample size.[18]

### 13 **Study population and sampling**

14 Our study was performed on 4,658 patients diagnosed with SP in the 12 years between  
15 January 2002 and December 2013 in Korea. SP patients were defined as those who used a  
16 medical service at least once for main or secondary diseases with the International Statistical  
17 Classification of Disease and Related Health Problems, 10<sup>th</sup> revision (ICD-10) J93.0  
18 (Spontaneous tension pneumothorax), J93.1 (Other spontaneous pneumothorax), J93.8 (Other  
19 pneumothorax), or J93.9 (Pneumothorax, unspecified). S27 (Injury of other and unspecified  
20 intrathoracic organs) and S27.0X (Traumatic pneumothorax) were excluded because this  
21 analysis was only for SP patients.

### 22 **Main descriptive variables**

#### 23 Prevalence rate of SP

24 For each year, the frequency per 100,000 individuals and the frequency of patients who used  
25 medical services at least once for SP as the major or secondary diagnosis were determined.  
26 Sociodemographic characteristics are shown by sex, age, income level, and insurance type.  
27 Based on previous studies,[6, 8] age was subdivided as follows: < 15, 15–34, 35–64, and ≥

1 65 years. Income level was divided into low (0, 1, 2, or 3 out of 0–10), medium (4, 5, 6, or 7),  
2 or high (8, 9, or 10). Insurance type was divided into region-based enrollee, job-based  
3 enrollee, and medical assistance recipient.

4 For each year, the prevalence of SP per 100,000 individuals and the frequency of patients  
5 who were hospitalized due to SP were analyzed. In addition, prevalence rate of SSP was  
6 analyzed. SSP was operationally defined as SP patients with a diagnosis of underlying lung  
7 disease such as COPD, pneumonia, interstitial lung disease, lung cancer, asthma, and lung  
8 abscess within a year before the first date of SP onset. Patients who used hospitalization  
9 services at least once were counted; two or more hospitalizations were not counted more than  
10 once. The hospitalization rate among pneumothorax patients was calculated using the same  
11 standards: the denominator was the number of patients who used medical services at least  
12 once due to SP in a given year, by sex and age, and the numerator was the number of patients  
13 who used hospitalization services at least once.

#### 14 Hospitalization of SP patients by year

15 Frequency of rehospitalization due to SP is shown by time period. The ratios of the total  
16 rehospitalization number to rehospitalization in a specific time period are also shown. The  
17 number of rehospitalizations counted all hospitalizations (other than the first-time) and  
18 allowed for duplication for each patient. To calculate the number of hospitalizations per  
19 person, the average, standard deviation (SD), minimum and maximum number of  
20 hospitalizations per time period were calculated. For the number of hospitalizations per  
21 person, first-time hospitalizations were also included. The interval between hospitalizations  
22 was calculated as the interval between the dates of two admissions.

#### 23 Comorbidities in SP patients

24 Diseases were counted as comorbidities if they were diagnosed as the major or secondary  
25 disease within 1 year before the first date of SP onset. The number of patients who were  
26 given codes for frequent comorbidities, i.e., COPD, pneumonia, interstitial lung disease, lung  
27 cancer, asthma, and lung abscess, were counted; patients with multiple comorbid conditions  
28 were counted more than once.[8, 19] The Charlson Comorbidity Index (CCI) was categorized

1  
2  
3  
4  
5 1 into normal and CCI 0, 1, 2, and  $\geq 3$ . [20-22] ICD-10 codes of comorbidities are shown in  
6  
7 2 Supplement Table 1.

### 3 Treatment period and medical costs of SP patients

4 The total number of follow-ups within 60 days after medical service use due to new SP onset,  
5 the number of follow-ups that occurred within a specified duration, and the comparative ratio  
6 of follow-ups within 60 days was analyzed. The mean, minimum, and maximum number of  
7 follow-ups, including the first medical service use, were analyzed. For hospitalization service  
8 users, the follow-up duration was calculated based on the date of discharge. The number of  
9 follow-ups in a specified period after discharge and the average number of follow-ups are  
10 shown.

11 Additionally, the average follow-up duration and average medical costs for each new SP  
12 onset were also calculated, as was the average length of hospitalization for patients. Given  
13 that we analyzed administrative data, it was necessary to distinguish between medical service  
14 use due to new SP onset and that due to follow-up. Based on previous research indicating that  
15 air leaks from SP generally stops within approximately 15 days and that X-ray follow-up is  
16 recommended 2–4 weeks after discharge, [7, 23] screening analysis results and discussions  
17 with medical experts in Korea, SP follow-up duration was determined as 60 days. New SP  
18 onset was defined as cases in which no medical service use (due to SP) was recorded in the  
19 previous 60 days. When one patient experienced multiple new occurrences of SP, repeated  
20 counting was allowed.

21 The medical costs of SP patients included the average medical cost per person. Medical costs  
22 determined to be eligible for reimbursement by Health Insurance Review and Assessment  
23 Service (HIRA) out of treatment costs were indicated in the submitted insurance claim  
24 statement. Medical costs are the sum of benefits reimbursed by the insurer (NHIS) to the  
25 medical care institutions and self-payment costs paid by the beneficiary (patient). Each  
26 patient's medical costs were calculated as the sum of costs listed on their claims. The average  
27 medical costs were the amount of total medical expenses for one year divided by the number  
28 of patients.

## 1 Treatment and medication for SP patients

2 In terms of treatment of SP patients, the most frequent treatment with a code that corresponds  
3 to the “Procedure/surgery” category in the statement listing SP as the major or secondary  
4 diagnosis was given. All statements prescribing the corresponding treatment were counted  
5 and duplication of treatments and patients were allowed. Treatments were categorized as non-  
6 surgical treatments and surgical treatments. Non-surgical treatment included oxygen  
7 inhalation, nebulizer treatment of the lower airway, suction drainage or tracheostomy suction  
8 and tracheal intubation, and surgical treatment included thoracostomy, wedge resection of the  
9 lung, resection of bullae, and pleurodesis. The criteria distinguishing between surgical and  
10 non-surgical treatments were in accordance with the classification of the claims data.  
11 Percentages were calculated by having the denominator as codes that correspond to the  
12 “Procedure/surgery” category, excluding costs of materials, drugs used during treatment and  
13 list of tests. For medications, the most frequent treatment belonging to the code that  
14 corresponds to the “Medication” category in the diagnostic statement was given. Among  
15 frequently prescribed drugs, digestants were excluded. Similar to “Procedure/surgery”, all  
16 statements that prescribed the corresponding drug were counted; and drug and patient  
17 duplication was allowed. Medication data were limited to cases of inpatient prescription,  
18 while outpatient prescriptions were excluded. Based on the 5<sup>th</sup> Anatomical Therapeutic  
19 Chemical (ATC) Classification System level,[11, 12, 24] notation of the medication taken  
20 was indicated by the 5-step code of the chemical name; and the three drugs that did not  
21 undergo the 5-step classification were indicated by their ingredients.

### 22 **Statistical analysis**

23 The total annual prevalence rate of SP and that of hospitalization due to SP are shown in  
24 frequency and frequency per 100,000 individuals. It was calculated by dividing the  
25 corresponding frequency by the total population that fits in the corresponding range and  
26 multiplying by 100,000. Categorical variables, such as the sociodemographic characteristics,  
27 number of rehospitalizations per period, comorbidities, CCI level, and follow-up frequency  
28 per period, treatment and drugs for the total number of SP patients for 12 years, are shown as  
29 frequencies and percentages. Continuous variables, such as number of hospitalizations, CCI

1 value, total follow-up frequency, length of hospitalization in days and medical costs, are  
 2 reflected by calculating the average, SD, minimum, and maximum values. Logistic regression  
 3 analysis was performed including age, sex, income, type of insurance and comorbidity to  
 4 identify factors influencing hospitalization rate. Data cleaning and analyses were conducted  
 5 using the statistical package SAS version 9.4 (SAS Institute Inc., Cary, NC).

## 6 **The patient and public involvement statement**

7 Patients and the public were not involved in the design. Encrypted and published data was  
 8 used in this study. Thus, there were no patients' involvement in this study.

## 9 **RESULTS**

### 10 **Sociodemographic characteristics of SP patients**

11 Flow chart that summarizes the selection of patients is shown Supplement fig.1. It shows that  
 12 4,658 patients used medical services for SP as their major or secondary diagnosis, at least  
 13 once during 2002 to 2013. The sociodemographic characteristics of SP patients are shown in  
 14 Table 1.. The male-to-female ratio was about 4.4:1. Most patients were 15–34-year-olds,  
 15 while those below 15-years were least affected. Most were in the high-income group, while  
 16 the low-income group utilized medical services the least. Job-based enrollees were the most  
 17 common category.

19 Table 1. Sociodemographic characteristics of spontaneous pneumothorax patients

|             | All SP<br>(n=4,658) | %*   |
|-------------|---------------------|------|
| Sex         |                     |      |
| Male        | 3,796               | 81.5 |
| Female      | 862                 | 18.5 |
| Age (years) |                     |      |
| < 15        | 123                 | 2.6  |
| 15–34       | 2,407               | 51.7 |

|                |                    |       |      |
|----------------|--------------------|-------|------|
|                | 35–64              | 1,374 | 29.5 |
|                | ≥ 65               | 754   | 16.2 |
| Income range   |                    |       |      |
|                | Low (0–3)          | 1,037 | 22.3 |
|                | Medium (4–7)       | 1,725 | 37.0 |
|                | High (8–10)        | 1,896 | 40.7 |
| Insurance type |                    |       |      |
|                | Region             | 1,741 | 37.4 |
|                | Job                | 2,804 | 60.2 |
|                | Medical Assistance | 113   | 2.4  |

1 \*% =  $N / 4,658 \times 100$ , SP: spontaneous pneumothorax

## 2 **Prevalence rate of SP**

3 The annual prevalence rate of SP (SP patients per 100,000 individuals) by sex ranged from 39  
 4 to 66 per 100,000 individuals, depending on the year (Fig. 1). The prevalence rate of SP  
 5 consistently increased from 2002 to 2011 and decreased slightly thereafter. Among males, the  
 6 rate was 63 per 100,000 individuals in 2002, and then increased consistently to 109 per  
 7 100,000 individuals in 2011. Thereafter, it decreased slightly, but the rate still exceeded 100  
 8 per 100,000 individuals in 2012 and 2013. Among females, the rate was 15 per 100,000  
 9 individuals in 2002, and remained essentially constant at 15–18 per 100,000 individuals,  
 10 except for an increase to 23 per 100,000 individuals in 2011. The male-to-female ratio slowly  
 11 increased from 4.2:1 in 2002, to a ratio of 6.5:1 in 2010.

12 In all years, except 2002, the SP prevalence rate was the highest in the 15–34-year-old group,  
 13 followed by the ≥ 65-year-old, 34–64-year-old, and < 15-year-old groups (Fig. 2). The  
 14 prevalence rate for those in the 15–34-year-old group was 64.8 per 100,000 individuals in  
 15 2002, which then increased to 133.2 per 100,000 individuals in 2009. The rate in the ≥ 65-  
 16 year-olds also increased, from 69.1 per 100,000 individuals in 2002 to 93.5 per 100,000  
 17 individuals in 2013.



1  
2  
3  
4 1 The prevalence rate of SP by sex, age, income level, and insurance type are summarized in  
5  
6 2 Supplement Table 2. To examine the detailed distribution by age, age groups were further  
7  
8 3 subdivided into 5-year increments. The prevalence rate tended to be the highest at 15–19  
9  
10 4 years, decreased to 40–49 years, and then peaked again at 65–74 years before decreasing  
11  
12 5 again (Supplement fig.2). The prevalence rate was slightly higher in the high-income group,  
13  
14 6 but remained low among medical-assistance recipients, although this rate increased after  
15  
16 7 2011 to a rate higher than that of health insurance enrollees.

17  
18 8 The prevalence rates of SP patients who were hospitalized are shown in Figs. 3 and 4. The  
19  
20 9 rate of hospitalization was 18.3 per 100,000 individuals in 2002, increasing to 36.2 per  
21  
22 10 100,000 individuals in 2011 before decreasing in 2012. The rate of hospitalization in men  
23  
24 11 was 31.4 per 100,000 individuals in 2002, which increased to 61.0 per 100,000 individuals in  
25  
26 12 2011. Among women, the hospitalization rate was 5.3 per 100,000 individuals in 2002 and  
27  
28 13 11.3 per 100,000 in 2011. This rate decreased for both sexes in 2012. The rate tended to  
29  
30 14 increase up to 2012 for men, but there was no consistent trend for females. The male-to-  
31  
32 15 female ratio of hospitalization was 6:1 on average. By age, hospitalization in the 15–34-year  
33  
34 16 age group was the highest at 33–75 per 100,000 individuals, followed by the  $\geq 65$ -year-old  
35  
36 17 group and the 35–64-year-old group. The rate was the lowest for the  $< 15$ -year-old group, at  
37  
38 18 1–3 per 100,000 individuals. The prevalence of hospitalized SP patients among the total  
39  
40 19 population, by age and sex, are shown in Supplement Table 3.

41  
42 20 The prevalence rates of SSP ranged from 10.5 to 12.1 per 100,000 individuals, from 8.5 to  
43  
44 21 9.6 in male and 1.4 to 2.7 in female (Supplement fig. 3).

## 45 22 **Hospitalization of SP patients by year**

46  
47 23 Within the SP patient sample, the proportion of those receiving hospital treatments was  
48  
49 24 defined as the hospitalization treatment rate. The number of patients who used the  
50  
51 25 hospitalization service for SP in 2002 was 188 (47.2%) (Table 2). The rate of hospitalization  
52  
53 26 treatment slowly increased thereafter up to 2010 and then decreased slightly. No sex-related  
54  
55 27 differences in hospitalization treatment rates were observed. However, for age-related  
56  
57 28 differences, the  $\geq 65$ -year-old group had the highest hospitalization treatment rate, while the



1 < 15-year-old group had the lowest rate. In addition, as a result of the logistic regression  
2 analysis model, the hospitalization rate was influenced by sex, age and underlying lung  
3 disease (Supplement Table 4).

4 The frequency and proportion of rehospitalization of SP patients is shown in Supplement  
5 Table 5. In total, 3,005 patients used hospital services at least once due to SP between 2002  
6 and 2013. Among these, 1,683 were rehospitalized, with 60.7% of all rehospitalizations  
7 occurring within 6 months and 71.4% within 1 year. The average number of hospitalizations  
8 per person overall was 1.56, at an average interval of 223.07 days.

---

Table 2. Rate of hospitalization treatment for spontaneous pneumothorax patients

|      | Total<br>SP<br>(N) | Total<br>HP<br>(N) | HR<br>(%)* | Sex  |      |        |      | Age (years) |      |       |      |       |      |      |      |
|------|--------------------|--------------------|------------|------|------|--------|------|-------------|------|-------|------|-------|------|------|------|
|      |                    |                    |            | Male |      | Female |      | < 15        |      | 15–34 |      | 35–64 |      | ≥ 65 |      |
|      |                    |                    |            | N    | HR*  | N      | HR*  | N           | HR*  | N     | HR*  | N     | HR*  | N    | HR*  |
| 2002 | 398                | 188                | 47.2       | 161  | 50.0 | 27     | 35.5 | 4           | 36.4 | 111   | 53.1 | 43    | 35.0 | 30   | 54.5 |
| 2003 | 490                | 236                | 48.2       | 202  | 50.0 | 34     | 39.5 | 2           | 33.3 | 135   | 49.1 | 62    | 42.2 | 37   | 59.7 |
| 2004 | 504                | 262                | 52.0       | 217  | 52.7 | 45     | 48.9 | 9           | 40.9 | 151   | 54.7 | 56    | 42.7 | 46   | 61.3 |
| 2005 | 514                | 276                | 53.7       | 235  | 55.7 | 41     | 44.6 | 3           | 33.3 | 161   | 59.2 | 74    | 45.7 | 38   | 53.5 |
| 2006 | 518                | 281                | 54.2       | 241  | 56.8 | 40     | 42.6 | 2           | 16.7 | 156   | 54.7 | 66    | 47.5 | 57   | 69.5 |
| 2007 | 555                | 286                | 51.5       | 244  | 51.8 | 42     | 50.0 | 4           | 36.4 | 169   | 56.3 | 73    | 44.2 | 40   | 50.6 |
| 2008 | 557                | 296                | 53.1       | 270  | 57.0 | 26     | 31.3 | 3           | 27.3 | 183   | 57.7 | 62    | 39.7 | 48   | 65.8 |
| 2009 | 610                | 327                | 53.6       | 279  | 53.8 | 48     | 52.7 | 4           | 36.4 | 215   | 58.0 | 59    | 41.3 | 49   | 57.6 |
| 2010 | 598                | 342                | 57.2       | 306  | 59.1 | 36     | 45.0 | 3           | 21.4 | 196   | 59.4 | 89    | 50.6 | 54   | 69.2 |
| 2011 | 661                | 364                | 55.1       | 307  | 56.1 | 57     | 50.0 | 3           | 25.0 | 208   | 57.1 | 82    | 45.8 | 71   | 67.0 |
| 2012 | 623                | 338                | 54.3       | 285  | 53.6 | 53     | 58.2 | 4           | 36.4 | 184   | 52.9 | 83    | 50.3 | 67   | 67.7 |
| 2013 | 616                | 338                | 54.9       | 291  | 55.5 | 47     | 51.1 | 4           | 30.8 | 175   | 55.4 | 86    | 51.5 | 73   | 60.8 |

\* Hospitalization rate (%) = N / total number of spontaneous pneumothorax patients × 100

SP : spontaneous pneumothorax, HR : Hospitalization rate, HP : Hospitalized patients

## Comorbidities in SP patients

Lung-related comorbidities in SP patients by age are shown in Table 3. For the < 15-year-old group, there were no particular comorbidities. COPD was the most common comorbidity, followed by pneumonia and asthma.

Table 3. Comorbidities of spontaneous pneumothorax patients

|              | 15–34        |      | 35–64        |      | ≥ 65       |      | Total        |      |
|--------------|--------------|------|--------------|------|------------|------|--------------|------|
|              | years        |      | years        |      | years      |      |              |      |
|              | N            | %*   | N            | %†   | N          | %‡   | N            | %§   |
| <b>Total</b> | <b>2,407</b> |      | <b>1,374</b> |      | <b>497</b> |      | <b>4,658</b> |      |
| COPD         | 273          | 11.3 | 277          | 20.2 | 287        | 57.7 | 837          | 18.0 |
| Pneumonia    | 102          | 4.2  | 109          | 7.9  | 150        | 30.2 | 361          | 7.8  |
| Interstitial | 4            | 0.2  | 17           | 1.2  | 13         | 2.6  | 34           | 0.7  |
| Lung cancer  | 11           | 0.5  | 72           | 5.2  | 67         | 13.5 | 150          | 3.2  |
| Asthma       | 63           | 2.6  | 111          | 8.1  | 174        | 35.0 | 348          | 7.5  |
| Lung abscess | 1            | 0.0  | 8            | 0.6  | 0          | 0.0  | 9            | 0.2  |
| CCI          |              |      |              |      |            |      |              |      |
| Mean         | 0.25         |      | 0.69         |      | 1.31       |      | 0.47         |      |
| 0            | 1,823        | 75.7 | 708          | 51.5 | 173        | 34.8 | 2,704        | 58.1 |
| 1            | 468          | 19.4 | 420          | 30.6 | 305        | 61.4 | 1,193        | 25.6 |
| 2            | 45           | 1.9  | 165          | 12.0 | 166        | 33.4 | 376          | 8.1  |
| 3 or more    | 5            | 0.2  | 65           | 4.7  | 99         | 19.9 | 159          | 3.4  |

\* % =  $N / 2,407 \times 100$

† % =  $N / 1,374 \times 100$

‡ % =  $N / 496 \times 100$

§ % =  $N / 4658 \times 100$

COPD, Chronic Obstructive Pulmonary Disease; CCI, Charlson Comorbidity Index

1  
2  
3  
4 COPD was more common in the  $\geq 65$ -year-old group than in the younger age groups. Fewer  
5  
6 patients among the 15–34-year-old group had asthma than pneumonia. The prevalence of all  
7  
8 comorbidities other than lung abscess was the highest in the  $\geq 65$ -year-old group. The lung cancer  
9  
10 rate was lower in the 15–34-year-old and 35–64-year-old groups than in the  $\geq 65$ -year-old group.

11  
12 The average CCI value of SP patients was 0.47 and increased with increasing age. The number of  
13  
14 patients with a CCI value of 0 decreased with increasing age, while that of patients with a CCI value  
15  
16 of  $\geq 3$  increased with increasing age.

### 17 18 19 **Treatment period and medical costs of SP patients**

20  
21 There were 4,157 outpatient service users among patients with first-time SP (no use of medical  
22  
23 service for SP for 60 days prior) from 2002 to 2013 (Table 4). Among these, 3,035 required follow-  
24  
25 up within 60 days of the first onset of SP. Most follow-ups occurred within 30 days. The average  
26  
27 number of follow-ups in each time period including the first-time visit was found to be 1.14 days  
28  
29 within 7 days, 1.33 days within 14 days, 1.54 days within 30 days, and 1.73 days within 60 days. The  
30  
31 average length of time between follow-ups was 11.07 days and the average medical cost per person  
32  
33 was \$94.5 (106,766 KRW).

---

Table 4. Outpatient or inpatient treatment period and medical costs of spontaneous pneumothorax

|                                |       | FU frequency during period | Total FU frequency (Including first visit)            |       |       |     |         |
|--------------------------------|-------|----------------------------|-------------------------------------------------------|-------|-------|-----|---------|
|                                |       | Cumulative frequency       | Total FU frequency (Within 60 days) Comparative ratio | Mean  | SD    | min | max     |
| <b>Outpatient FU</b>           |       |                            |                                                       |       |       |     |         |
| First-time outpatient use      | 4,157 |                            |                                                       |       |       |     |         |
| Within 7 days                  |       | 582                        | 19.2                                                  | 1.14  | 0.42  | 1   | 6       |
| Within 14 days                 |       | 1,372                      | 45.2                                                  | 1.33  | 0.63  | 1   | 8       |
| Within 30 days                 |       | 2,245                      | 74.0                                                  | 1.54  | 0.84  | 1   | 13      |
| Within 60 days                 |       | 3,035                      | 100.0                                                 | 1.73  | 1.07  | 1   | 13      |
| Average follow-up period       |       |                            |                                                       | 11.07 | 16.55 | 0   | 60      |
| Average medical costs (US \$)* |       |                            |                                                       | 94.5  | 141.5 | 0.9 | 2,673.6 |
| <b>Hospitalization FU</b>      |       |                            |                                                       |       |       |     |         |
| First-time                     | 3,005 |                            |                                                       |       |       |     |         |

1  
2  
3  
4  
5  
6  
7  
8  
9  
10  
11  
12  
13  
14  
15  
16  
17  
18  
19  
20  
21  
22  
23  
24  
25  
26  
27  
28  
29  
30  
31  
32  
33  
34  
35  
36  
37  
38  
39  
40  
41  
42  
43  
44  
45  
46

---

|                                           |     |       |         |         |      |          |
|-------------------------------------------|-----|-------|---------|---------|------|----------|
| hospitalization use                       |     |       |         |         |      |          |
| Within 7 days                             | 180 | 30.0  | 1.06    | 0.24    | 1    | 3        |
| Within 14 days                            | 301 | 50.1  | 1.10    | 0.31    | 1    | 3        |
| Within 30 days                            | 451 | 75.0  | 1.15    | 0.40    | 1    | 5        |
| Within 60 days                            | 601 | 100.0 | 1.20    | 0.48    | 1    | 7        |
| Average number of days of hospitalization |     |       | 14.19   | 18.25   | 0    | 601      |
| Average follow-up period                  |     |       | 3.67    | 10.67   | 0    | 60       |
| Average medical costs (US \$)*            |     |       | 2,523.0 | 2,692.2 | 45.9 | 48,967.3 |

---

\*The cost of items determined to be eligible for reimbursement by the HIRA (Health Insurance Review and Assessment Service) out of the total treatment amount were indicated in the submitted insurance claim statement. It was converted from Korean Won to US dollar, according to the exchange rate on October 12, 2018 (US \$1.00 = Korean 1,130 Won).

FU : follow-up; SD: standard deviation; min: minimum; max: maximum

1  
2  
3  
4 1 The number of hospitalizations for first cases of SP was 3,005, of which 601 required follow-up  
5  
6 2 within 60 days of discharge. Most follow-ups occurred within 30 days and the proportion of  
7  
8 3 follow-ups occurring in the first week was higher for in-patients than for outpatient service users.  
9  
10 4 The average number of follow-ups was lower for inpatients than for outpatient service users. The  
11  
12 5 average length of hospitalization was 14.19 days. The average follow-up period after discharge  
13  
14 6 was 3.67 days and the average medical costs for each hospitalization were markedly higher than  
15  
16 7 those of outpatients.

### 17 8 **Treatment and medication for SP patients**

19  
20 9 Treatment and medication details are shown in Table 5. The most commonly received non-  
21  
22 10 surgical treatment for SP patients was oxygen inhalation, followed by suction drainage or  
23  
24 11 tracheostomy suction. Thoracostomy was the most common surgical treatment, followed by lung  
25  
26 12 wedge resection. The frequency of other surgical treatments was low. The rate of surgery for SP  
27  
28 13 varied by year, but was estimated at about 40%. It was highest at 47.5% in 2010 and slightly  
29  
30 14 decreased thereafter. By sex, the rate of surgery was higher in males than females (Supplement  
31  
32 15 fig. 4).

33 16 Medication commonly prescribed for SP could be categorized into analgesics, antitussives, and  
34  
35 17 antibiotics, when excluding digestants. Among analgesics, paracetamol, codeine combinations,  
36  
37 18 excluding psycholeptics and tramadol as well as paracetamol combinations were prescribed at  
38  
39 19 similar rates. Among antitussives, most prescribed was bromhexine. Among antibiotics, cefixime  
40  
41 20 was the most frequently prescribed.

42 21

---

43  
44  
45 22

1 Table 5. Treatments and drugs used for spontaneous pneumothorax patients

|                                                | Treatment     |      | Drugs                                         |           |
|------------------------------------------------|---------------|------|-----------------------------------------------|-----------|
|                                                | N             | %*   | N                                             | %†        |
| Total count of prescription statements         | <b>21,107</b> |      | <b>37,488</b>                                 |           |
| <b>Non-surgical treatments</b>                 |               |      | <b>Analgesics</b>                             |           |
| Oxygen Inhalation                              | 4,351         | 20.6 | Paracetamol                                   | 1,039 2.8 |
| Nebulizer Treatment Of Lower Airway            | 534           | 2.5  | Codeine, combinations excluding psycholeptics | 878 2.3   |
| Suction Drainage Or Tracheostomy Suction, Etc. | 2,481         | 11.8 | Tramadol and paracetamol                      | 832 2.2   |
| Tracheal Intubation                            | 81            | 0.4  | Propionic acid-derivatives                    | 784 2.1   |
| <b>Surgical treatments</b>                     |               |      | Aceclofenac                                   | 455 1.2   |
| Thoracostomy                                   | 3,132         | 14.8 | <b>Antitussives</b>                           |           |
| Wedge Resection Of Lung                        | 1,304         | 6.2  | Acetylcysteine                                | 672 1.8   |
| Resection Of Bullae                            | 125           | 0.6  | Xanthines                                     | 635 1.7   |
| Pleurodesis                                    | 27            | 0.1  | Bromhexine                                    | 789 2.1   |
| Apicolysis, Pleurolysis                        | 15            | 0.1  | Ambroxol                                      | 553 1.5   |
| Lobectomy Of Lung                              | 13            | 0.1  | <b>Antibiotics</b>                            |           |
| Pleurectomy                                    | 12            | 0.1  | Cefixime                                      | 374 1.0   |
| Segmentectomy Of Lung                          | 10            | 0.0  | Third-generation cephalosporins               | 305 0.8   |



|                       |   |     |
|-----------------------|---|-----|
| Pleural Decortication | 8 | 0.0 |
| Primary Thoracoplasty | 4 | 0.0 |

---

1 \*% = N / 21,107

2 †% = N / 37,488

For peer review only

## 1 DISCUSSION

2 The annual prevalence of SP ranged from 39 to 66 per 100,000 individuals. The male-to-female  
3 ratio was approximately 4–10:1, and the 15–34-year-old group, particularly 15–19-year-olds,  
4 showed the highest prevalence rate. About 47–57% SP patients underwent hospitalization.  
5 COPD was the most common comorbidity. The average treatment period was 11 days as an  
6 outpatient and 14 days in-hospital. The average medical costs were \$94.50 for outpatients and  
7 \$2523 for hospital admissions. The most common treatment for SP was oxygen inhalation and  
8 thoracostomy, and operation rate was about 40%. The most commonly prescribed medications  
9 were analgesics, antitussives, and antibiotics.

10 In this large study in Korea, the annual prevalence rate of SP was 39–66 per 100,000 individuals.  
11 These numbers were slightly higher than those previously reported: 1.2–7.4 per 100,000  
12 individuals in Minnesota [5] and 9.8–24 per 100,000 individuals in the United Kingdom.[6] The  
13 reason for these differences may be because SP was defined as cases in which medical service  
14 was used, which could include follow-up appointments, rather than the strict number of incidents.  
15 In contrast, the prevalence rate of hospitalization due to SP was 18–36 per 100,000 individuals  
16 overall. These rates were previously reported as 14.3–22.7 per 100,000 individuals overall,[7, 8]  
17 and are similar to those found in our study. The similarity may be because hospitalization was as  
18 a result of new SP incidents only. In addition, the prevalence rate of SP consistently increased  
19 from 2002 to 2011. This is consistent with previous a study that showed increased prevalence of  
20 SP.[25] The cause of this problem is still controversial. Though deteriorated atmosphere  
21 condition is presumed to be the cause,[26–28] the increase underlying lung diseases such as  
22 COPD or lung cancer could be another cause. In this study, there was no significant change in  
23 the prevalence rate of SSP by year, which implies that PSP was increased, not by increasing of  
24 underlying lung disease. To solve the problem of increasing SP prevalence, further study which  
25 can determine the exact cause is needed

26 The prevalence rate was much higher for males than in previous studies. The male-to-female  
27 ratio for all SP and for hospitalized SP was higher than that reported previously (2.4:1–3.3:1).[6,  
28 8, 9] In terms of age, the prevalence rate was the highest for the 15–34-year-old group,  
29 particularly for the 15–19-year-old group, followed by the  $\geq$  65-year-old, 35–64-year-old, and

1 < 15-year-old group, respectively. Previous studies showed a peak-age for SP at 20, followed by  
2 a later peak at 70.[8, 29] Overall, the incidence of SP was higher in Korea, particularly in males  
3 and at a slightly earlier age (15–19 years) than in other countries: e.g., 20–25 years in France [7]  
4 and Germany,[8] and 20–24 years or 30–34 years in England.[6] The prevalence of SP in males  
5 increased until 2012, while there was no clear trend in females. Since there was no previous  
6 large-scale research in Eastern countries, we cannot conclude whether these results are due to  
7 ethnicity or environment. In addition, the choice of terms between ‘prevalence’ and ‘incidence’  
8 was one of the challenges of this study. It was determined to use ‘prevalence’ because there were  
9 several previous studies that reported ‘prevalence’ and this study was based on the occurrence of  
10 within the period of a year.

11 SP has a high rate of hospitalization;[30] 47–57% of SP patients in our study received hospital  
12 treatment. There were no marked differences due to sex, although the female hospitalization rate  
13 was slightly lower. The hospitalization rate was highest in the  $\geq$  65-year-old group and lowest  
14 in the < 15-year-old group. The necessity of hospitalization for SP is debated. Hallifax and  
15 Rahman stated in 2015 that outpatient treatment is sufficient for patients who are young, have no  
16 comorbidities, and have stable vital signs; however, the evidence of outpatient treatment stability  
17 is lacking.[10]

18 SP has a high rate of relapse;[24, 25, 31] with 1,683 of 3,003 first-time hospitalization cases  
19 requiring rehospitalization in our study. Although previous studies have shown that the relapse  
20 rate of SP is 15–40%,[7, 11, 12, 25, 32] these studies were based on small sample sizes (82–273  
21 subjects). [7, 11, 12, 25, 32] Though there was a large-scale study, only hospitalized patients  
22 were analyzed.[25] The risk factors for SP relapse are controversial; some studies indicate that  
23 elderly people and women are at higher risk,[7, 33] while other studies indicate that age and sex  
24 have no significant effect.[34] Furthermore, low BMI [12, 35], non-surgical treatment and  
25 smoking habits [12, 34] have been implicated in SP, yet further study is required to delineate the  
26 risk factors.

27 SP can involve lung-related comorbidities.[36, 37] To distinguish between PSP and SSP, it is  
28 important to evaluate comorbidities. This distinction is important, as these conditions have  
29 different characteristics and prognoses;[23, 38] however, categorizing these conditions based on

1 administrative data remains challenging.[19] This is because there are no codes to differentiate  
2 between PSP and SSP in the ICD categorizations. Nevertheless, our objective was to describe  
3 details related to SP; thus, we examined the current comorbidity status, rather than attempting to  
4 categorize SP patients. Among comorbidities, COPD was the most common in all age groups.  
5 With increasing age, the proportion of patients with comorbidities increased; thus, with  
6 increasing age, SSP was more common than PSP. Therefore, the decrease in SP risk with age,  
7 followed by an increase, may be due to an increase in SSP in particular.

8 The approximate treatment period for SP was 11 days for outpatients and 17.7 days for  
9 hospitalized patients. The average number of follow-ups within 60 days was 1.73. Thus, many  
10 cases of SP were minor and a single outpatient visit is necessary to complete the treatment. For  
11 both hospitalization and outpatient service users, 75% of total follow-ups occurred within 1  
12 month; hence, the follow-up duration for SP is short. Few studies have assessed the treatment or  
13 follow-up duration for SP, yet our results are similar to a previous study reporting a remission  
14 period of 7–15 days for SP,[23, 39]. X-ray follow-up is recommended within 2–4 weeks of  
15 discharge [35] and the median value of length of stay (LOS) is 6–7 days.[7, 33] No previous  
16 study has reported the socioeconomic costs due to SP; in our study, we found an average medical  
17 cost of \$94.50 per person for outpatient services and of \$2,523.00 per person for hospitalization.  
18 The maximum costs were \$2,673.60 per person for outpatient and \$48,967.30 per person for  
19 hospitalization.

20 For treatment, surgery, and medication for SP patients, we reported the frequency of  
21 prescriptions rather than the number of people. Oxygen inhalation among non-surgical  
22 treatments and thoracostomy among surgical treatments were the most common procedures. A  
23 previous study has also shown that the most common treatment for SP patients is thoracostomy  
24 (92% of patients).[32] The surgery most commonly performed after thoracostomy is lung wedge  
25 resection; this involves removing a portion of the lung and is less invasive, preserves more lung  
26 function, and has fewer side-effects than lobar resection.[40, 41] The rate of surgery showed a  
27 mild tendency to increase until 2010 and then decreased slightly thereafter. It was not possible to  
28 confirm whether this was due to the severity of SP or the medical practice tendency in Korea.  
29 For medication; analgesics, antitussives, and antibiotics were the most frequently prescribed,  
30 after excluding digestants. For convenience of analysis, we excluded outpatient prescriptions.

1  
2  
3  
4 1 Considering that the rate of hospitalization exceeded 60% for SP patients, prescription patterns  
5 2 are not likely to differ markedly between hospitalized and overall cases.  
6  
7

8 3 This study has several limitations. First, we could not distinguish between PSP and SSP because  
9 4 of the limitations of the data. Accordingly, it was also impossible to present each treatment  
10 5 methods. According to a study analyzing the first line treatment and management of PSPs and  
11 6 SPSs, there are differences with PSPs and SSPs in management methods[15]. Further research is  
12 7 needed on the epidemiology and medical service use of each SP category. Secondly, our results  
13 8 should be interpreted with caution, as we could not ascertain whether medical service use was  
14 9 due to new incidents of SP or to follow-up. That is, rehospitalizations with the same episodes and  
15 10 recurrence 60 days before the last treatment were not detected. Although we attempted to select  
16 11 medical service use due to new incidents of SP by using an operational definition, this may not  
17 12 have been accurate. Thirdly, our study may be limited by the lack of data on uncovered items  
18 13 and from patients who were not covered by health insurance. However, in Korea, because 98%  
19 14 of the total population is covered by health insurance, it seems to be the entire population data.  
20 15 Existence of uncovered items or indirect medical costs was a limitation in this study. In addition,  
21 16 as the diagnosis codes in the claim's data that was the basis for identifying the patients may not  
22 17 be completely accurate [42], it is not clear whether all patients with SP were listed under the  
23 18 appropriate corresponding diagnosis codes. Lastly, since analysis was performed using NHI data  
24 19 from 2002, there is a possibility of misclassification of new-onset SP due to SP patients who ever  
25 20 suffered from SP before 2012.  
26  
27  
28  
29  
30  
31  
32  
33  
34  
35  
36  
37  
38  
39

40 21 However, despite these limitations, this study provided a detailed record of the epidemiology and  
41 22 treatment of SP. Our study is significant in that it provides novel information, contributing to an  
42 23 understanding of SP, a little-understood condition with an increasing prevalence in Korea.  
43  
44  
45

## 46 24 **CONCLUSION**

47  
48  
49 25 This study investigated the epidemiology and medical treatment of SP in Korea, which was not  
50 26 studied before. As a result, the incidence of SP in Korea is increasing, incidence in men is higher  
51 27 than women. It also showed a high rate of SP recurrence within a year, how treatment of  
52 28 pneumothorax in Korea is being done. However, this study not identify the specific cause of the  
53 29 increase in SP. Therefore, future research is needed to identify the cause of increased SP in  
54  
55  
56  
57  
58  
59  
60

1  
2  
3  
4  
5  
6  
7  
8  
9  
10  
11  
12  
13  
14  
15  
16  
17  
18  
19  
20  
21  
22  
23  
24  
25  
26  
27  
28  
29  
30  
31  
32  
33  
34  
35  
36  
37  
38  
39  
40  
41  
42  
43  
44  
45  
46  
47  
48  
49  
50  
51  
52  
53  
54  
55  
56  
57  
58  
59  
60

1 Korea and find ways to prevent the increase in SP

2

3

4

5

6

7

For peer review only

1  
2  
3  
4 **1 Acknowledgements**  
5

6 2 The authors thank Kyungwon Kang, who conducted data cleaning and initial analyses.  
7  
8

9 **3 Author contributions**  
10

11 4 IHH, LYJ and BJ contributed to the overall conception and design of the study protocol. BJ and  
12 5 DK contributed to the specific study design and data analysis. DK wrote the first draft of the  
13 6 manuscript. DK, BJ, SHC, BHJ, YJL and IHH contributed to interpretation of the analyses and  
14 7 revisions of the final manuscript. All authors gave final approval of the version to be submitted.  
15  
16  
17  
18

19 **8 Funding statement**  
20

21 9 This research received no specific grant from any funding agency in the public, commercial or  
22 10 not-for-profit sectors.  
23  
24  
25

26 **11 Competing interest**  
27

28 12 No competing interests to declare.  
29  
30

31 **13 Ethics approval**  
32

33 14 The study was approved by the Institutional Review Board of Jaseng Hospital of Korean  
34 15 Medicine in Seoul, Korea (JASENG 2018-09-007).  
35  
36  
37

38 **16 Data sharing statement**  
39

40 17 The datasets generated and analyzed during the current study are available on the National  
41 18 Health Insurance Sharing Service. NHIS provides support to research activities in various sectors  
42 19 of society, the economy, environment, industry, etc., as well as policy and academic research on  
43 20 the health sector by providing sample cohort databases. The research database consists of five  
44 21 types of databases: a sample cohort database, medical check-up cohort database, elderly cohort  
45 22 database, working women cohort database, and infant medical check-up cohort database. Each  
46  
47  
48  
49  
50  
51  
52  
53  
54  
55  
56  
57  
58  
59  
60

1 cohort database consists of the following four detailed data-sets: qualification database, treatment  
2 database, medical check-up database, and clinic database.

3 The present study utilized the sample cohort database, which is a third-party data not owned by  
4 the authors. The sample cohort database is available upon approval for data sharing, from the  
5 health insurance corporation. For the purpose of policy and academic research a fee is paid to  
6 obtain data from the NHIS website [<https://nhiss.nhis.or.kr/bd/ab/bdaba022eng.do>].

7

For peer review only



## 1 REFERENCES

- 2 1. Tortora G, Anagnostakos N. Principles of Anatomy and Physiology. New York: Harper  
3 & Row 1987.
- 4 2. Luh SP. Review: Diagnosis and treatment of primary spontaneous pneumothorax. *J*  
5 *Zhejiang Univ Sci B* 2010;11:735–44 doi:10.1631/jzus.B1000131
- 6 3. Imran JB, Eastman AL. Pneumothorax. *Jama* 2017;318:974  
7 doi:10.1001/jama.2017.10476
- 8 4. Sahn SAMD, Heffner JE. spontaneous pneumothorax. *N Engl J Med* 2000;342:868–74  
9 doi:10.1056/NEJM200003233421207
- 10 5. Melton III LJ, Hepper NG, Offord KP. Incidence of spontaneous pneumothorax in  
11 Olmsted County, Minnesota: 1950 to 1974. *Am Rev Respir Dis* 1979;120:1379–82  
12 doi:10.1164/arrd.1979.120.6.1379
- 13 6. Gupta D, Hansell A, Nichols T, et al. Epidemiology of pneumothorax in England.  
14 *Thorax* 2000;55:666–71 doi:10.1136/thorax.55.8.666
- 15 7. Bobbio A, Dechartres A, Bouam S, et al. Epidemiology of spontaneous pneumothorax:  
16 gender-related differences. *Thorax* 2015;70:653–8 doi:10.1136/thoraxjnl-2014-206577
- 17 8. Schnell J, Koryllos A, Lopez-Pastorini A, et al. Spontaneous Pneumothorax  
18 Epidemiology and Treatment in Germany Between 2011 and 2015. *Dtsch Arztebl Int*  
19 2017;114:739 doi:10.3238/arztebl.2017.0739
- 20 9. Bense L, Eklund G, Wiman LG. Smoking and the increased risk of contracting  
21 spontaneous pneumothorax. *Chest* 1987;92:1009–12 doi:10.1378/chest.92.6.1009
- 22 10. Hallifax RJ, Rahman NM. Epidemiology of pneumothorax--finally something solid out  
23 of thin air. *Thorax* 2015;70:921–2 doi:10.1136/thoraxjnl-2015-207438

- 1  
2  
3  
4 1 11. Saito Y, Suzuki Y, Demura R, et al. The outcome and risk factors for recurrence and  
5 extended hospitalization of secondary spontaneous pneumothorax. *Surg Today* 2018;48:320–24  
6 doi:10.1007/s00595-017-1585-8  
7  
8 3  
9  
10 4 12. Tan J, Yang Y, Zhong J, et al. Association Between BMI and Recurrence of Primary  
11 Spontaneous Pneumothorax. *World J Surg* 2017;41:1274–80 doi:10.1007/s00268-016-3848-8  
12  
13 5  
14 6 13. Kim D, Shin HJ, Kim SW, et al. Psychological Problems of Pneumothorax According to  
15 Resilience, Stress, and Post-Traumatic Stress. *Psychiatry Investig* 2017;14:795–800  
16 doi:10.4306/pi.2017.14.6.795  
17  
18 8  
19  
20 9 14. Sousa I, Abrantes P, Francisco V, et al. Multicentric Genome-Wide Association Study  
21 for Primary Spontaneous Pneumothorax. *PLoS One* 2016;11:e0156103  
22 doi:10.1371/journal.pone.0156103  
23  
24 11  
25  
26 12 15. Kepka S, Dalphin JC, Pretalli JB, et al. How spontaneous pneumothorax is managed in  
27 emergency departments: a French multicentre descriptive study. *BMC Emerg Med* 2019;19:4  
28 doi:10.1186/s12873-018-0213-2  
29  
30 14  
31  
32 15 16. Kwon S. Thirty years of national health insurance in South Korea: lessons for achieving  
33 universal health care coverage. *Health Policy Plan* 2009;24:63–71 doi:10.1093/heapol/czn037  
34  
35 16  
36  
37 17. <http://www.nhis.or.kr/retrieveHomeMain.xx>.  
38  
39 18 18. Lee J, Lee JS, Park SH, et al. Cohort Profile: The National Health Insurance Service-  
40 National Sample Cohort (NHIS-NSC), South Korea. *Int J Epidemiol* 2017;46:e15  
41 doi:10.1093/ije/dyv319  
42  
43 20  
44  
45 21 19. Frechette E, Guidolin K, Seyam A, et al. Identifying Primary Spontaneous  
46 Pneumothorax from Administrative Databases: A Validation Study. *Can Respir J*  
47 2016;2016:1690482 doi:10.1155/2016/1690482  
48  
49 23  
50  
51 24 20. Sundararajan V, Henderson T, Perry C, et al. New ICD-10 version of the Charlson  
52 comorbidity index predicted in-hospital mortality. *J Clin Epidemiol* 2004;57:1288–94  
53 doi:10.1016/j.jclinepi.2004.03.012  
54  
55 26  
56  
57  
58  
59  
60

- 1  
2  
3  
4 1 21. Bannay A, Chaignot C, Blotiere PO, et al. The Best Use of the Charlson Comorbidity  
5 Index With Electronic Health Care Database to Predict Mortality. *Med Care* 2016;54:188–94  
6 doi:10.1097/mlr.0000000000000471  
7  
8  
9  
10 4 22. Charlson M, Wells MT, Ullman R, et al. The Charlson comorbidity index can be used  
11 prospectively to identify patients who will incur high future costs. *PLoS One* 2014;9:e112479  
12 doi:10.1371/journal.pone.0112479  
13  
14  
15  
16 7 23. MacDuff A, Arnold A, Harvey J. Management of spontaneous pneumothorax: British  
17 Thoracic Society Pleural Disease Guideline 2010. *Thorax* 2010;65 Suppl 2:ii18–31  
18 doi:10.1136/thx.2010.136986  
19  
20  
21  
22 10 24. Skrbo A, Begovic B, Skrbo S. Classification of drugs using the ATC system (Anatomic,  
23 Therapeutic, Chemical Classification) and the latest changes. *Med Arh* 2004;58:138–41  
24  
25  
26  
27 12 25. Hallifax RJ, Goldacre R, Landray MJ, et al. Trends in the Incidence and Recurrence of  
28 Inpatient-Treated Spontaneous Pneumothorax, 1968-2016. *Jama* 2018;320:1471–80  
29 doi:10.1001/jama.2018.14299  
30  
31  
32  
33 15 26. Marx T, Bernard N, Parmentier AL, et al. Does air pollution really impact the onset of  
34 spontaneous pneumothorax? A French case-crossover study. *Environ Int* 2019;127:317–23  
35 doi:10.1016/j.envint.2019.01.056  
36  
37  
38  
39 18 27. Park JH, Lee SH, Yun SJ, et al. Air pollutants and atmospheric pressure increased risk of  
40 ED visit for spontaneous pneumothorax. *Am J Emerg Med* 2018;36:2249–53  
41 doi:10.1016/j.ajem.2018.04.020  
42  
43  
44  
45 21 28. Heyndrickx M, Le Rochais JP, Icard P, et al. Do atmospheric conditions influence the  
46 first episode of primary spontaneous pneumothorax? *Interact Cardiovasc Thorac Surg*  
47 2015;21:296–300 doi:10.1093/icvts/ivv145  
48  
49  
50  
51 24 29. Nakamura H, Konishiike J, Sugamura A, et al. Epidemiology of spontaneous  
52 pneumothorax in women. *Chest* 1986;89:378–82 doi:10.1378/chest.89.3.378  
53  
54  
55  
56  
57  
58  
59  
60

- 1  
2  
3  
4 1 30. Jheon SH, Lee EB, Choe JY, et al. Critical pathway for management of primary  
5 2 spontaneous pneumothorax. *Korean J Thoracic and Cardiovascular Surg* 2002;35:43–47  
6  
7  
8 3 31. Sadikot RT, Greene T, Meadows K, et al. Recurrence of primary spontaneous  
9 4 pneumothorax. *Thorax* 1997;52:805–9 doi:10.1136/thx.52.9.805  
10  
11  
12 5 32. Aghajanzadeh M, Asgary MR, Delshad MSE, et al. Data on the epidemiology, diagnosis,  
13 6 and treatment of patients with pneumothorax. *Data Brief* 2018;20:1053–6  
14 7 doi:10.1016/j.dib.2018.08.063  
15  
16  
17 8 33. Sjostrom C, Stalenheim G, Janson C. Spontaneous pneumothorax--a study of medical  
18 9 records. High age is the most significant risk factor of prolonged length of stay. *Lakartidningen*  
19 10 2002;99:1070–4  
20  
21  
22 11 34. Kepka S, Dalphin JC, Parmentier AL, et al. Primary Spontaneous Pneumothorax  
23 12 Admitted in Emergency Unit: Does First Episode Differ from Recurrence? A Cross-Sectional  
24 13 Study. *Can Respir J* 2017;2017:2729548 doi:10.1155/2017/2729548  
25  
26  
27 14 35. Huang TW, Lee SC, Cheng YL, et al. Contralateral recurrence of primary spontaneous  
28 15 pneumothorax. *Chest* 2007;132:1146–50 doi:10.1378/chest.06-2772  
29  
30  
31 16 36. Kwas H, Zendah I, Ghedira H. Spontaneous pneumothorax secondary to tuberculosis.  
32 17 *Tunis Med* 2017;95:276–79  
33  
34  
35 18 37. Iga N, Nishi H, Fujimoto N, et al. Clinical features of secondary spontaneous  
36 19 pneumothorax complicated with silicosis. *Respir Investig* 2018;56:144–49  
37 20 doi:10.1016/j.resinv.2017.11.007  
38  
39  
40 21 38. Onuki T, Ueda S, Yamaoka M, et al. Primary and Secondary Spontaneous  
41 22 Pneumothorax: Prevalence, Clinical Features, and In-Hospital Mortality. *Can Respir J*  
42 23 2017;2017:6014967 doi:10.1155/2017/6014967  
43  
44  
45 24 39. Chee CB, Abisheganaden J, Yeo JK, et al. Persistent air-leak in spontaneous  
46 25 pneumothorax--clinical course and outcome. *Respir Med* 1998;92:757–61  
47  
48  
49  
50  
51  
52  
53  
54  
55  
56  
57  
58  
59  
60

- 1  
2  
3  
4 1 40. Cao J, Yuan P, Wang Y, et al. Survival Rates After Lobectomy, Segmentectomy, and  
5 2 Wedge Resection for Non-Small Cell Lung Cancer. *Ann Thorac Surg* 2018;105:1483–91  
6 3 doi:10.1016/j.athoracsur.2018.01.032  
7  
8  
9  
10 4 41. Sihoe AD, Van Schil P. Non-small cell lung cancer: when to offer sublobar resection.  
11 5 *Lung Cancer* 2014;86:115–20 doi:10.1016/j.lungcan.2014.09.004  
12  
13  
14 6 42. Kim JA, Yoon S, Kim LY, et al. Towards Actualizing the Value Potential of Korea  
15 7 Health Insurance Review and Assessment (HIRA) Data as a Resource for Health Research:  
16 8 Strengths, Limitations, Applications, and Strategies for Optimal Use of HIRA Data. *J Korean*  
17 9 *Med Sci* 2017;32:718–28 doi:10.3346/jkms.2017.32.5.71  
18  
19  
20  
21  
22  
23  
24  
25  
26  
27  
28  
29  
30  
31  
32  
33  
34  
35  
36  
37  
38  
39  
40  
41  
42  
43  
44  
45  
46  
47  
48  
49  
50  
51  
52  
53  
54  
55  
56  
57  
58  
59  
60

1  
2  
3  
4 **1 Figure legends**  
5

6  
7 2 Fig. 1. Annual prevalence rate of spontaneous pneumothorax, by sex (per 100,000 individuals).  
8

9 3 Fig. 2. Annual prevalence rate of spontaneous pneumothorax, by age (per 100,000 individuals).  
10

11 4 Fig. 3. Annual prevalence rate of hospitalization due to spontaneous pneumothorax, by sex (per  
12 100,000 individuals).  
13

14 6 Fig. 4. Annual prevalence rate of hospitalization due to spontaneous pneumothorax, by age (per  
15 7 100,000 individuals).  
16

17  
18 8 Supplement fig.1. Flow chart of selection patients.  
19

20  
21 9 Supplement fig. 2. Prevalence rate of spontaneous pneumothorax by age (per 100,000  
22 10 individuals).  
23

24 11 Supplement fig. 3. Annual prevalence rate of secondary spontaneous pneumothorax, by sex (per  
25 12 100,000 individuals)  
26

27 13 Supplement fig. 4. Annual rate of surgery due to spontaneous pneumothorax, by sex (per  
28 14 100,000 individuals)  
29  
30  
31  
32  
33

34 16  
35  
36  
37  
38  
39  
40  
41  
42  
43  
44  
45  
46  
47  
48  
49  
50  
51  
52  
53  
54  
55  
56  
57  
58  
59  
60

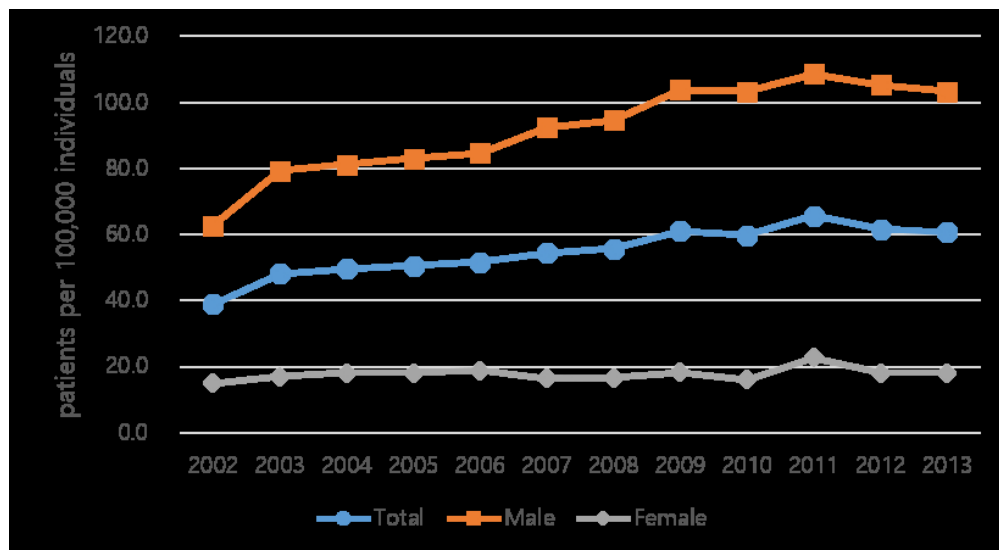

fig1

69x38mm (300 x 300 DPI)

1  
2  
3  
4  
5  
6  
7  
8  
9  
10  
11  
12  
13  
14  
15  
16  
17  
18  
19  
20  
21  
22  
23  
24  
25  
26  
27  
28  
29  
30  
31  
32  
33  
34  
35  
36  
37  
38  
39  
40  
41  
42  
43  
44  
45  
46  
47  
48  
49  
50  
51  
52  
53  
54  
55  
56  
57  
58  
59  
60

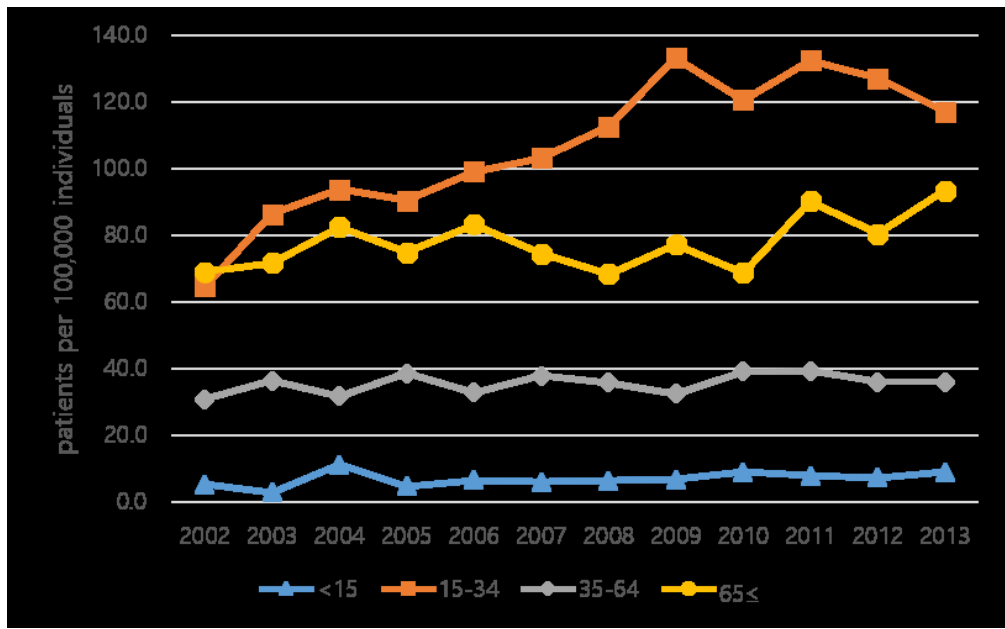

fig2

68x42mm (300 x 300 DPI)



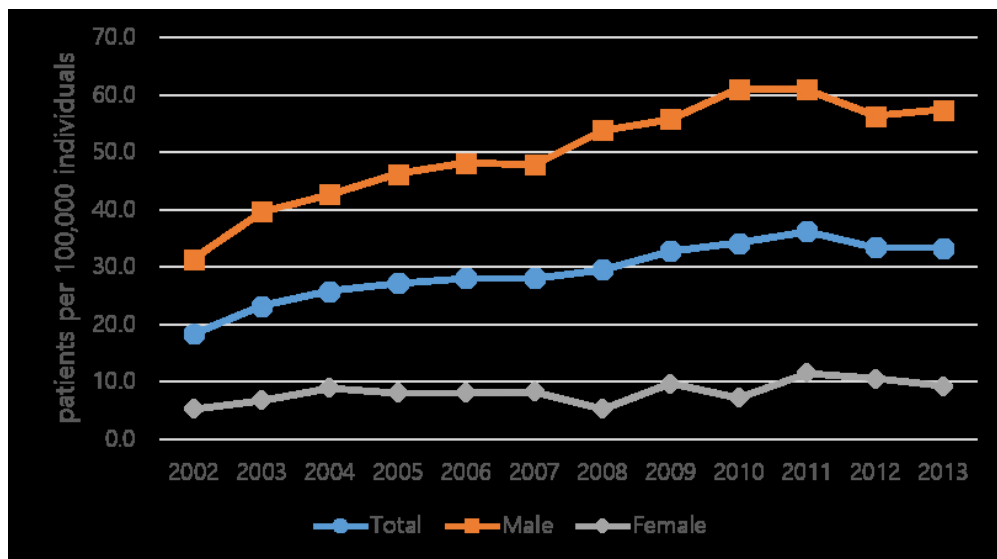

fig3

68x38mm (300 x 300 DPI)

1  
2  
3  
4  
5  
6  
7  
8  
9  
10  
11  
12  
13  
14  
15  
16  
17  
18  
19  
20  
21  
22  
23  
24  
25  
26  
27  
28  
29  
30  
31  
32  
33  
34  
35  
36  
37  
38  
39  
40  
41  
42  
43  
44  
45  
46  
47  
48  
49  
50  
51  
52  
53  
54  
55  
56  
57  
58  
59  
60

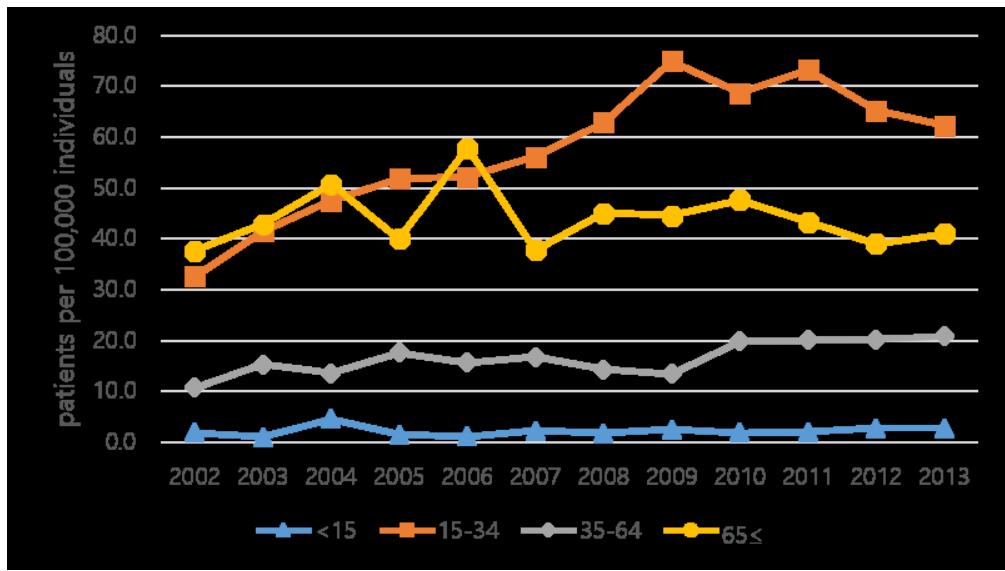

fig4

67x38mm (300 x 300 DPI)

**Supplement Table 1.** ICD-10 codes of comorbidities in spontaneous pneumothorax

| <b>Disease</b>                   | <b>Code</b>                                     |
|----------------------------------|-------------------------------------------------|
| <b>COPD</b>                      | J40*, J41*, J42*, J43*, J44*, J961, J982        |
| <b>Pneumonia</b>                 | J12*, J13*, J14*, J15*, J16*, J18*              |
| <b>Interstitial lung disease</b> | J84*                                            |
| <b>Lung cancer</b>               | C34*, C780*, C783, D022-D024, D143*, D174, D381 |
| <b>Asthma</b>                    | J45*                                            |
| <b>Lung abscess</b>              | J850, J851, J852                                |

ICD-10, International Statistical Classification of Disease and Related Health Problems, 10<sup>th</sup> revision; COPD, Chronic Obstructive Pulmonary Disease

**Supplement Table 2.** Prevalence rate of spontaneous pneumothorax per 100,000 individuals and sociodemographic characteristics

|                          | 2002 |       | 2003 |       | 2004 |       | 2005 |       | 2006 |       | 2007 |       | 2008 |       | 2009 |       | 2010 |       | 2011 |       | 2012 |       | 2013 |       |  |
|--------------------------|------|-------|------|-------|------|-------|------|-------|------|-------|------|-------|------|-------|------|-------|------|-------|------|-------|------|-------|------|-------|--|
|                          | N    | Prev. |  |
| <b>Total SP Patients</b> | 398  | 38.8  | 490  | 48.2  | 504  | 49.6  | 514  | 50.5  | 518  | 51.7  | 555  | 54.4  | 557  | 55.7  | 610  | 61.1  | 598  | 59.7  | 661  | 65.7  | 623  | 61.6  | 616  | 60.7  |  |
| <b>Sex</b>               |      |       |      |       |      |       |      |       |      |       |      |       |      |       |      |       |      |       |      |       |      |       |      |       |  |
| Male                     | 322  | 62.7  | 404  | 79.3  | 412  | 81.1  | 422  | 83.0  | 424  | 84.7  | 471  | 92.4  | 474  | 94.6  | 519  | 103.9 | 518  | 103.3 | 547  | 108.7 | 532  | 105.2 | 524  | 103.3 |  |
| Female                   | 76   | 14.8  | 86   | 16.9  | 92   | 18.1  | 92   | 18.1  | 94   | 18.8  | 84   | 16.4  | 83   | 16.6  | 91   | 18.2  | 80   | 16.0  | 114  | 22.7  | 91   | 18.0  | 92   | 18.1  |  |
| <b>Age</b>               |      |       |      |       |      |       |      |       |      |       |      |       |      |       |      |       |      |       |      |       |      |       |      |       |  |
| < 15                     | 11   | 5.3   | 6    | 3.0   | 22   | 11.2  | 9    | 4.7   | 12   | 6.6   | 11   | 6.2   | 11   | 6.5   | 11   | 6.8   | 14   | 9.0   | 12   | 7.9   | 11   | 7.5   | 13   | 9.1   |  |
| 15–34                    | 220  | 64.8  | 281  | 86.3  | 298  | 93.9  | 281  | 90.4  | 297  | 99.3  | 311  | 103.2 | 328  | 112.6 | 382  | 133.2 | 344  | 120.6 | 376  | 132.4 | 359  | 127.2 | 329  | 117.1 |  |
| 35–64                    | 123  | 30.9  | 147  | 36.4  | 131  | 31.8  | 162  | 38.6  | 139  | 32.9  | 165  | 37.9  | 156  | 35.9  | 143  | 32.5  | 176  | 39.3  | 179  | 39.4  | 165  | 36.0  | 167  | 36.1  |  |
| ≥ 65                     | 55   | 69.1  | 62   | 71.7  | 75   | 82.6  | 71   | 74.8  | 82   | 83.2  | 79   | 74.6  | 73   | 68.4  | 85   | 77.3  | 78   | 68.8  | 106  | 90.3  | 99   | 80.5  | 120  | 93.5  |  |
| <b>Sub-divided Age</b>   |      |       |      |       |      |       |      |       |      |       |      |       |      |       |      |       |      |       |      |       |      |       |      |       |  |
| < 15                     | 11   | 5.3   | 6    | 3.0   | 22   | 11.2  | 9    | 4.7   | 12   | 6.6   | 11   | 6.2   | 11   | 6.5   | 11   | 6.8   | 14   | 9.0   | 12   | 7.9   | 11   | 7.5   | 13   | 9.1   |  |
| 15–19                    | 81   | 114.7 | 96   | 143.2 | 110  | 165.5 | 106  | 160.4 | 111  | 166.2 | 140  | 200.4 | 162  | 231.4 | 193  | 270.2 | 179  | 245.2 | 184  | 254.0 | 156  | 218.9 | 153  | 220.2 |  |
| 20–24                    | 54   | 63.7  | 91   | 109.1 | 71   | 89.2  | 66   | 86.9  | 73   | 104.6 | 71   | 104.9 | 58   | 91.3  | 77   | 122.8 | 77   | 123.2 | 92   | 142.8 | 105  | 156.8 | 93   | 134.6 |  |
| 25–29                    | 41   | 47.6  | 50   | 62.6  | 55   | 70.0  | 55   | 69.6  | 66   | 84.0  | 63   | 77.6  | 58   | 72.1  | 60   | 78.0  | 45   | 61.3  | 46   | 66.4  | 50   | 76.5  | 44   | 70.1  |  |
| 30–34                    | 33   | 33.6  | 38   | 39.9  | 40   | 43.1  | 45   | 50.2  | 35   | 41.6  | 26   | 31.4  | 39   | 50.5  | 41   | 54.1  | 29   | 38.0  | 42   | 53.9  | 37   | 47.1  | 26   | 32.7  |  |
| 35–39                    | 23   | 25.7  | 30   | 33.1  | 28   | 30.5  | 39   | 42.1  | 32   | 34.4  | 34   | 35.9  | 30   | 32.7  | 26   | 29.0  | 41   | 47.3  | 31   | 37.3  | 34   | 42.4  | 33   | 43.2  |  |
| 40–44                    | 19   | 20.0  | 23   | 24.6  | 21   | 22.9  | 26   | 28.9  | 18   | 20.9  | 23   | 26.6  | 21   | 24.2  | 28   | 31.7  | 24   | 26.8  | 30   | 32.9  | 26   | 28.3  | 25   | 27.5  |  |
| 45–49                    | 26   | 35.4  | 22   | 28.4  | 21   | 25.7  | 26   | 30.5  | 20   | 22.7  | 30   | 32.9  | 32   | 35.8  | 24   | 27.3  | 24   | 27.8  | 29   | 34.5  | 15   | 18.0  | 28   | 32.6  |  |
| 50–54                    | 13   | 24.2  | 23   | 42.4  | 22   | 38.8  | 19   | 30.8  | 21   | 31.7  | 26   | 36.9  | 26   | 35.5  | 23   | 29.6  | 26   | 32.0  | 33   | 38.6  | 35   | 40.0  | 25   | 28.4  |  |
| 55–59                    | 21   | 48.4  | 25   | 55.9  | 18   | 38.9  | 25   | 51.5  | 26   | 53.7  | 23   | 44.8  | 26   | 50.9  | 21   | 39.3  | 32   | 54.6  | 29   | 45.4  | 27   | 40.2  | 31   | 43.3  |  |
| 60–64                    | 21   | 48.7  | 24   | 55.1  | 21   | 48.8  | 27   | 64.2  | 22   | 54.0  | 29   | 70.6  | 21   | 50.3  | 21   | 48.5  | 29   | 63.5  | 27   | 58.4  | 28   | 57.8  | 25   | 50.5  |  |
| 65–69                    | 23   | 71.1  | 22   | 64.3  | 30   | 84.4  | 34   | 93.9  | 30   | 80.6  | 32   | 79.4  | 25   | 62.9  | 24   | 61.2  | 26   | 67.3  | 32   | 83.8  | 28   | 73.3  | 30   | 75.4  |  |
| 70–74                    | 16   | 74.4  | 19   | 82.4  | 21   | 85.7  | 15   | 57.0  | 25   | 90.1  | 25   | 85.1  | 24   | 80.2  | 33   | 105.6 | 14   | 43.6  | 22   | 65.5  | 12   | 33.2  | 27   | 73.2  |  |
| ≥ 75                     | 16   | 62.1  | 21   | 72.0  | 24   | 78.1  | 22   | 68.0  | 27   | 80.4  | 22   | 60.8  | 24   | 64.9  | 28   | 70.9  | 38   | 89.1  | 52   | 114.0 | 59   | 121.2 | 63   | 121.8 |  |
| <b>Income</b>            |      |       |      |       |      |       |      |       |      |       |      |       |      |       |      |       |      |       |      |       |      |       |      |       |  |
| Low (0–3)                | 71   | 31.1  | 99   | 43.9  | 116  | 51.3  | 129  | 54.8  | 92   | 39.7  | 125  | 52.0  | 116  | 48.4  | 127  | 54.4  | 117  | 48.8  | 163  | 67.3  | 150  | 68.1  | 170  | 70.3  |  |
| Medium (4–7)             | 164  | 40.9  | 194  | 49.3  | 188  | 48.2  | 190  | 49.4  | 212  | 56.0  | 206  | 53.8  | 213  | 57.3  | 229  | 61.8  | 213  | 58.0  | 237  | 64.7  | 190  | 54.2  | 196  | 53.3  |  |

|   |                           |     |      |     |      |     |      |     |      |     |      |     |      |     |      |     |      |     |      |     |       |     |      |     |       |
|---|---------------------------|-----|------|-----|------|-----|------|-----|------|-----|------|-----|------|-----|------|-----|------|-----|------|-----|-------|-----|------|-----|-------|
| 1 | High (8-10)               | 163 | 41.1 | 197 | 49.5 | 200 | 50.0 | 195 | 49.2 | 214 | 54.6 | 224 | 56.3 | 228 | 58.5 | 254 | 64.4 | 268 | 67.8 | 261 | 65.5  | 283 | 64.2 | 250 | 61.7  |
| 2 | <b>Insurance type</b>     |     |      |     |      |     |      |     |      |     |      |     |      |     |      |     |      |     |      |     |       |     |      |     |       |
| 3 | <b>Region</b>             | 200 | 40.2 | 236 | 49.8 | 206 | 45.8 | 221 | 52.5 | 201 | 52.0 | 214 | 56.4 | 203 | 56.2 | 213 | 61.3 | 200 | 59.8 | 207 | 64.4  | 179 | 57.4 | 161 | 53.8  |
| 4 | <b>Employment</b>         | 195 | 39.3 | 252 | 49.2 | 292 | 54.7 | 285 | 51.1 | 315 | 54.6 | 336 | 55.8 | 346 | 57.6 | 390 | 63.3 | 396 | 62.6 | 419 | 64.4  | 414 | 62.0 | 415 | 60.5  |
| 5 | <b>Medical Assistance</b> | 3   | 9.8  | 2   | 6.3  | 6   | 18.1 | 8   | 21.1 | 2   | 5.1  | 5   | 12.7 | 8   | 20.5 | 7   | 19.8 | 2   | 5.7  | 35  | 103.7 | 30  | 95.8 | 40  | 132.9 |

8 Prevalence Rate

For peer review only

**Supplement Table 3.** Annual prevalence rate of hospitalization due to spontaneous pneumothorax (per 100,000 individuals)

| Hospitalization |     |         |             | Sex  |       |            |        |       |            | Age (years) |       |            |       |       |            |       |       |            |      |       |            |  |
|-----------------|-----|---------|-------------|------|-------|------------|--------|-------|------------|-------------|-------|------------|-------|-------|------------|-------|-------|------------|------|-------|------------|--|
|                 |     |         |             | Male |       |            | Female |       |            | < 15        |       |            | 15–34 |       |            | 35–64 |       |            | ≥ 65 |       |            |  |
| Year            | N   | Pre v.* | Gro w. (%)† | N    | Prev. | Grow. (%)† | N      | Prev. | Grow. (%)† | N           | Prev. | Grow. (%)† | N     | Prev. | Grow. (%)† | N     | Prev. | Grow. (%)† | N    | Prev. | Grow. (%)† |  |
| 2002            | 188 | 18.3    |             | 161  | 31.4  |            | 27     | 5.3   |            | 4           | 1.9   |            | 111   | 32.7  |            | 43    | 10.8  |            | 30   | 37.7  |            |  |
| 2003            | 236 | 23.2    | 26.5        | 202  | 39.7  | 26.5       | 34     | 6.7   | 26.9       | 2           | 1.0   | -48.4      | 135   | 41.5  | 26.9       | 62    | 15.3  | 42.0       | 37   | 42.8  | 13.7       |  |
| 2004            | 262 | 25.8    | 11.1        | 217  | 42.7  | 7.6        | 45     | 8.9   | 32.3       | 9           | 4.6   | 360.9      | 151   | 47.6  | 14.7       | 56    | 13.6  | -11.3      | 46   | 50.7  | 18.3       |  |
| 2005            | 276 | 27.1    | 5.3         | 235  | 46.2  | 8.3        | 41     | 8.1   | -8.9       | 3           | 1.6   | -65.7      | 161   | 51.8  | 8.9        | 74    | 17.6  | 29.6       | 38   | 40.1  | -20.9      |  |
| 2006            | 281 | 28.0    | 3.3         | 241  | 48.1  | 4.1        | 40     | 8.0   | -1.0       | 2           | 1.1   | -29.8      | 156   | 52.1  | 0.6        | 66    | 15.6  | -11.3      | 57   | 57.8  | 44.4       |  |
| 2007            | 286 | 28.0    | -0.1        | 244  | 47.8  | -0.6       | 42     | 8.2   | 3.0        | 4           | 2.2   | 103.9      | 169   | 56.1  | 7.5        | 73    | 16.8  | 7.4        | 40   | 37.8  | -34.7      |  |
| 2008            | 296 | 29.6    | 5.6         | 270  | 53.9  | 12.6       | 26     | 5.2   | -36.7      | 3           | 1.8   | -20.7      | 183   | 62.8  | 12.1       | 62    | 14.3  | -14.9      | 48   | 45.0  | 19.1       |  |
| 2009            | 327 | 32.7    | 10.7        | 279  | 55.8  | 3.6        | 48     | 9.6   | 85.0       | 4           | 2.5   | 39.3       | 215   | 74.9  | 19.3       | 59    | 13.4  | -6.1       | 49   | 44.5  | -1.0       |  |
| 2010            | 342 | 34.1    | 4.2         | 306  | 61.0  | 9.3        | 36     | 7.2   | -25.3      | 3           | 1.9   | -22.0      | 196   | 68.7  | -8.3       | 89    | 19.9  | 48.2       | 54   | 47.6  | 6.9        |  |
| 2011            | 364 | 36.2    | 6.0         | 307  | 61.0  | -0.1       | 57     | 11.3  | 57.6       | 3           | 2.0   | 2.7        | 208   | 73.3  | 6.6        | 82    | 20.1  | 1.2        | 71   | 43.4  | -8.9       |  |
| 2012            | 338 | 33.4    | -7.6        | 285  | 56.4  | -7.6       | 53     | 10.5  | -7.5       | 4           | 2.7   | 36.7       | 184   | 65.2  | -11.0      | 83    | 20.2  | 0.7        | 67   | 39.1  | -9.9       |  |
| 2013            | 338 | 33.3    | -0.4        | 291  | 57.4  | 1.8        | 47     | 9.3   | -11.7      | 4           | 2.8   | 2.8        | 175   | 62.3  | -4.5       | 86    | 20.8  | 3.0        | 73   | 41.0  | 5.0        |  |

Prev., \*Prevalence rate: rate of prevalence per 100,000 individuals.

Grow., †Growth rate (%) = (Current Year \*100) / Previous Year) - 100

**Supplement Table 4.** Logistic regression analysis of factors affecting hospitalization rate in spontaneous pneumothorax patients

| Characteristics                     | Hospitalization  |              |                          |              |
|-------------------------------------|------------------|--------------|--------------------------|--------------|
|                                     | Unadjusted OR    | 95% CI       | Adjusted OR <sup>b</sup> | 95% CI       |
| <b>Sex</b>                          |                  |              |                          |              |
| M                                   | 1.39             | (1.23, 1.57) | 1.40                     | (1.24, 1.59) |
| F                                   | 1.0 <sup>a</sup> | -            | 1.0 <sup>a</sup>         | -            |
| <b>Age</b>                          |                  |              |                          |              |
| < 15                                | 0.19             | (0.10, 0.38) | 0.20                     | (0.10, 0.40) |
| 15–34                               | 1.52             | (1.37, 1.69) | 1.48                     | (1.32, 1.64) |
| 35–64                               | 1.0 <sup>a</sup> | -            | 1.0 <sup>a</sup>         | -            |
| ≥ 65                                | 1.74             | (1.52, 1.99) | 1.73                     | (1.51, 1.98) |
| <b>Income range</b>                 |                  |              |                          |              |
| Low (0–3)                           | 1.0 <sup>a</sup> | -            | 1.0 <sup>a</sup>         | -            |
| Medium (4–7)                        | 0.98             | (0.86, 1.11) | 0.97                     | (0.86, 1.10) |
| High (8–10)                         | 0.97             | (0.86, 1.09) | 0.95                     | (0.84, 1.07) |
| <b>Insurance Type</b>               |                  |              |                          |              |
| Region                              | 1.0 <sup>a</sup> | -            | 1.0 <sup>a</sup>         | -            |
| Job                                 | 1.00             | (0.91, 1.10) | 0.99                     | (0.90, 1.09) |
| Medical Assistance                  | 1.60             | (1.17, 2.19) | 1.57                     | (1.15, 2.15) |
| <b>Comorbidities</b><br>(ref. none) |                  |              |                          |              |
| COPD                                | 2.34             | (2.02, 2.72) | 2.38                     | (2.04, 2.77) |
| Pneumonia                           | 2.05             | (1.66, 2.55) | 2.08                     | (1.67, 2.59) |
| Interstitial                        | 3.77             | (1.66, 8.59) | 3.87                     | (1.69, 8.84) |
| Lung cancer                         | 2.14             | (1.53, 2.99) | 2.16                     | (1.54, 3.04) |
| Asthma                              | 2.03             | (1.63, 2.52) | 2.08                     | (1.67, 2.60) |
| Lung abscess                        | 1.09             | (0.29, 4.07) | 1.02                     | (0.27, 3.79) |

OR; odds ratio, CI; confidence intervals; M, male; F, female; COPD, chronic obstructive pulmonary disease  
a; reference group, b: adjusted for age and sex

**Supplement Table 5.** Rehospitalization of spontaneous pneumothorax patients

| Rehospitalization<br>(within)                | Number of<br>rehospitalizations |                 | Number of hospitalizations per person |       |         |         |  |
|----------------------------------------------|---------------------------------|-----------------|---------------------------------------|-------|---------|---------|--|
|                                              | N*                              | Cumulative<br>% | Mean                                  | SD    | Minimum | Maximum |  |
| 6 months                                     | 1,022                           | 60.7            | 1.34                                  | 0.70  | 1       | 10      |  |
| 1 year                                       | 1,202                           | 71.4            | 1.40                                  | 0.80  | 1       | 12      |  |
| 2 years                                      | 1,412                           | 83.9            | 1.47                                  | 0.94  | 1       | 19      |  |
| Total                                        | 1,683                           | 100.0           | 1.56                                  | 1.07  | 1       | 19      |  |
| <b>Interval between<br/>hospitalizations</b> |                                 |                 | 223.07                                | 445.3 | 0       | 3,989   |  |

\*N = Cumulative frequency; SD, standard deviation



1  
2  
3  
4  
5  
6  
7  
8  
9  
10  
11  
12  
13  
14  
15  
16  
17  
18  
19  
20  
21  
22  
23  
24  
25  
26  
27  
28  
29  
30  
31  
32  
33  
34  
35  
36  
37  
38  
39  
40  
41

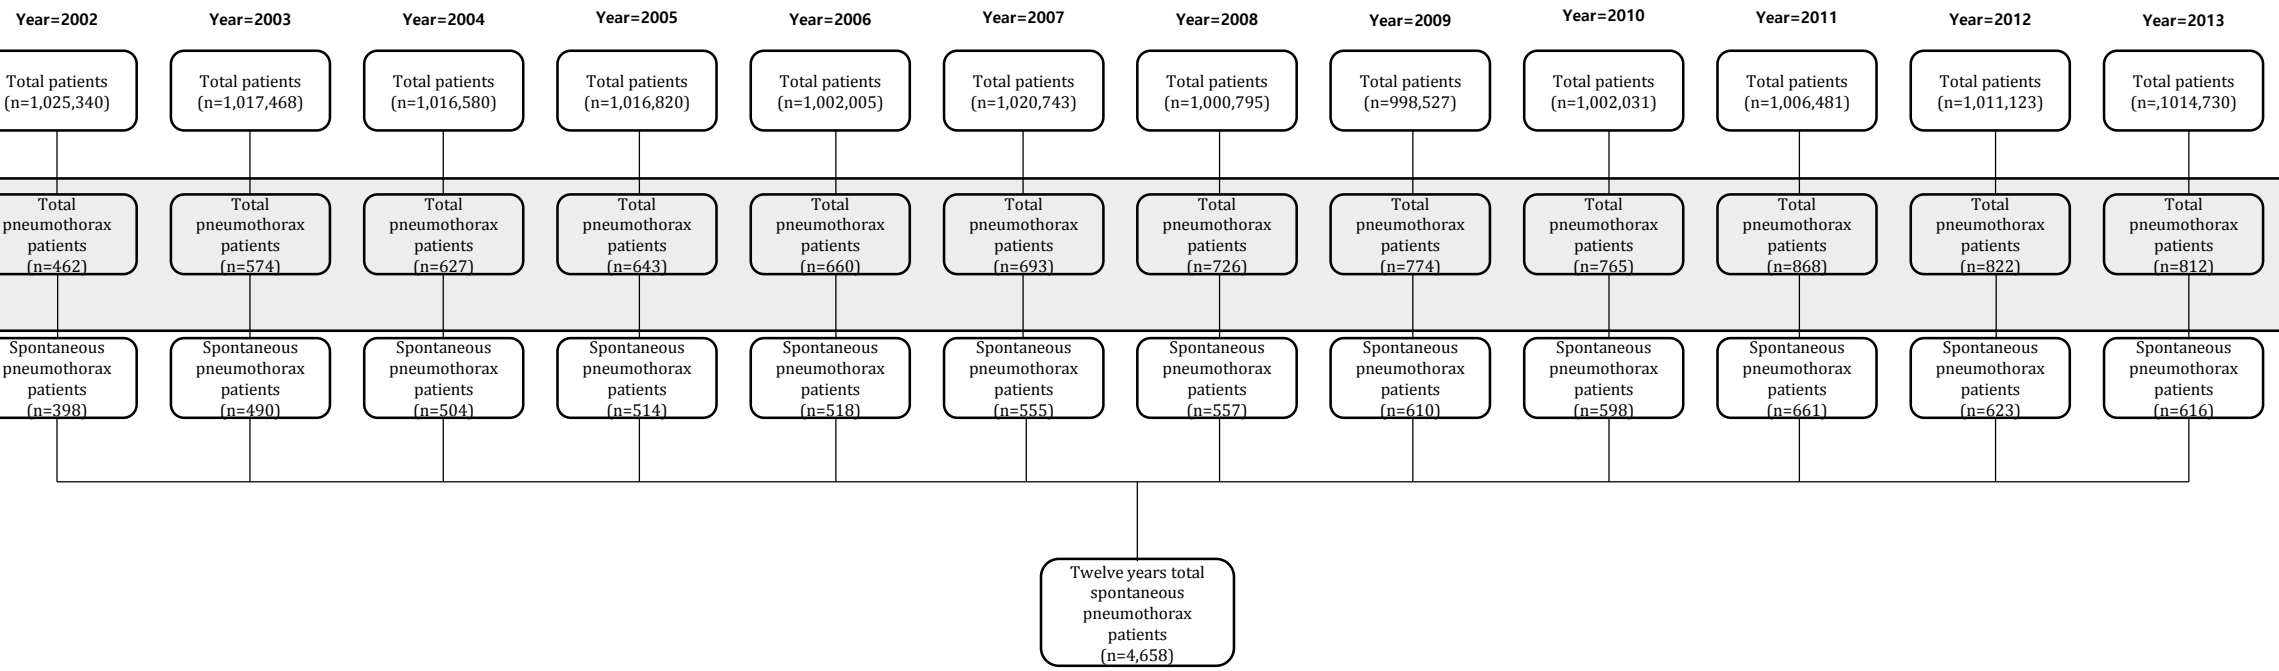

Excluded with S27 or S27.OX  
 -2002(n=64)  
 -2003(n=84)  
 -2004(n=123)  
 -2005(n=129)  
 -2006(n=142)  
 -2007(n=138)  
 -2008(n=169)  
 -2009(n=164)  
 -2010(n=167)  
 -2011(n=207)  
 -2012(n=199)  
 -2013(n=196)

1  
2  
3  
4  
5  
6  
7  
8  
9  
10  
11  
12  
13  
14  
15  
16  
17  
18  
19  
20  
21  
22  
23  
24  
25  
26  
27  
28  
29  
30  
31  
32  
33  
34  
35  
36  
37  
38  
39  
40  
41  
42  
43  
44  
45  
46  
47  
48  
49  
50  
51  
52  
53  
54  
55  
56  
57  
58  
59  
60



190x160mm (150 x 150 DPI)

1  
2  
3  
4  
5  
6  
7  
8  
9  
10  
11  
12  
13  
14  
15  
16  
17  
18  
19  
20  
21  
22  
23  
24  
25  
26  
27  
28  
29  
30  
31  
32  
33  
34  
35  
36  
37  
38  
39  
40  
41  
42  
43  
44  
45  
46  
47  
48  
49  
50  
51  
52  
53  
54  
55  
56  
57  
58  
59  
60

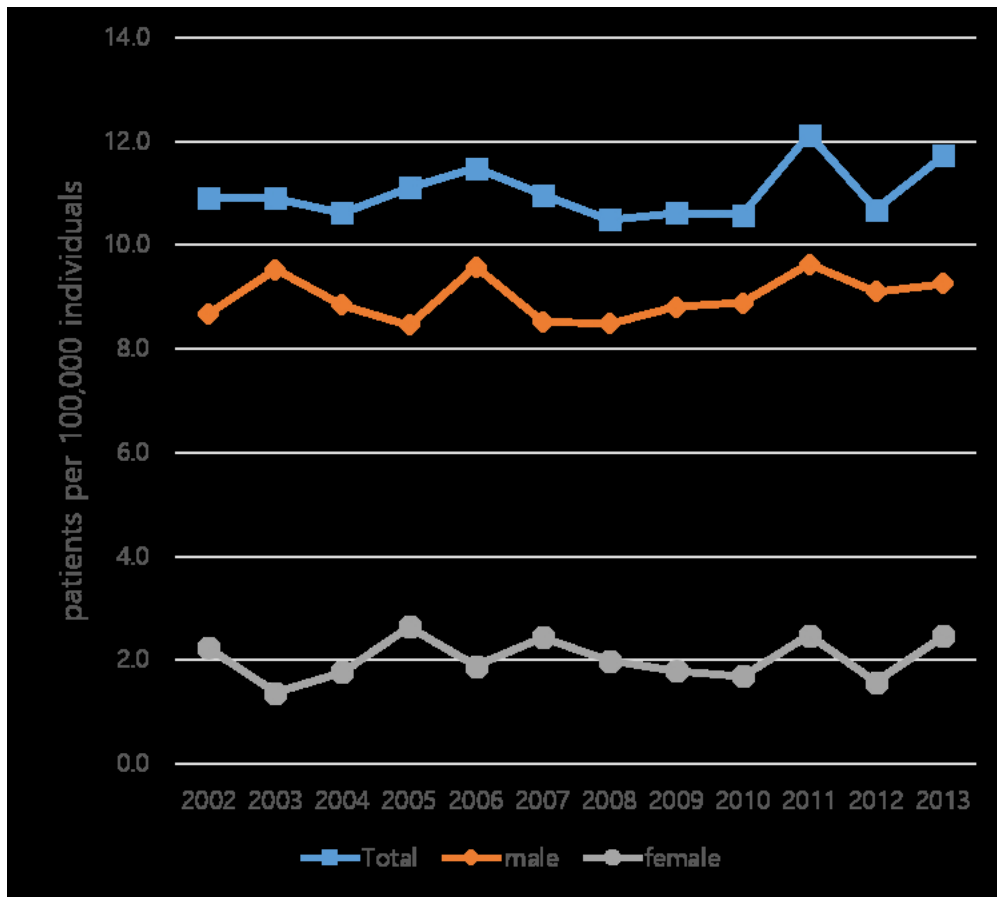

63x56mm (300 x 300 DPI)

1  
2  
3  
4  
5  
6  
7  
8  
9  
10  
11  
12  
13  
14  
15  
16  
17  
18  
19  
20  
21  
22  
23  
24  
25  
26  
27  
28  
29  
30  
31  
32  
33  
34  
35  
36  
37  
38  
39  
40  
41  
42  
43  
44  
45  
46  
47  
48  
49  
50  
51  
52  
53  
54  
55  
56  
57  
58  
59  
60



63x38mm (300 x 300 DPI)

**The RECORD statement – checklist of items, extended from the STROBE statement, that should be reported in observational studies using routinely collected health data.**

|                           | Item No. | STROBE items                                                                                                                                                                               | Location in manuscript where items are reported  | RECORD items                                                                                                                                                                                                                                                                                                                                                                                                                                | Location in manuscript where items are reported                                                                 |
|---------------------------|----------|--------------------------------------------------------------------------------------------------------------------------------------------------------------------------------------------|--------------------------------------------------|---------------------------------------------------------------------------------------------------------------------------------------------------------------------------------------------------------------------------------------------------------------------------------------------------------------------------------------------------------------------------------------------------------------------------------------------|-----------------------------------------------------------------------------------------------------------------|
| <b>Title and abstract</b> |          |                                                                                                                                                                                            |                                                  |                                                                                                                                                                                                                                                                                                                                                                                                                                             |                                                                                                                 |
|                           | 1        | (a) Indicate the study's design with a commonly used term in the title or the abstract (b) Provide in the abstract an informative and balanced summary of what was done and what was found | (a) P1L1(title), P2L5(abstract)<br>(b) P2L1-P2L1 | RECORD 1.1: The type of data used should be specified in the title or abstract. When possible, the name of the databases used should be included.<br><br>RECORD 1.2: If applicable, the geographic region and timeframe within which the study took place should be reported in the title or abstract.<br><br>RECORD 1.3: If linkage between databases was conducted for the study, this should be clearly stated in the title or abstract. | 1.1 P1L2(title), P2L6(abstract)<br>1.2 P1L2(title), P2L8(abstract)<br>1.3 There is no linkage between databases |
| <b>Introduction</b>       |          |                                                                                                                                                                                            |                                                  |                                                                                                                                                                                                                                                                                                                                                                                                                                             |                                                                                                                 |
| Background rationale      | 2        | Explain the scientific background and rationale for the investigation being reported                                                                                                       | P4L9-L19                                         |                                                                                                                                                                                                                                                                                                                                                                                                                                             |                                                                                                                 |
| Objectives                | 3        | State specific objectives, including any prespecified hypotheses                                                                                                                           | P4L20-L24                                        |                                                                                                                                                                                                                                                                                                                                                                                                                                             |                                                                                                                 |
| <b>Methods</b>            |          |                                                                                                                                                                                            |                                                  |                                                                                                                                                                                                                                                                                                                                                                                                                                             |                                                                                                                 |
| Study Design              | 4        | Present key elements of study design early in the paper                                                                                                                                    | P5L2-L11                                         |                                                                                                                                                                                                                                                                                                                                                                                                                                             |                                                                                                                 |
| Setting                   | 5        | Describe the setting, locations, and relevant dates, including periods of recruitment, exposure, follow-up, and data collection                                                            | P5L12-L20                                        |                                                                                                                                                                                                                                                                                                                                                                                                                                             |                                                                                                                 |

|                                                                                                                                                                                                            |          |                                                                                                                                                                                                                                                                                                                                                                                                                                                                                                                                                                                                                                                                                                                        |                                                        |                                                                                                                                                                                                                                                                                                                                                                                                                                                                                                                                                                                                                                                                                                      |                                                                                                                                                                                        |
|------------------------------------------------------------------------------------------------------------------------------------------------------------------------------------------------------------|----------|------------------------------------------------------------------------------------------------------------------------------------------------------------------------------------------------------------------------------------------------------------------------------------------------------------------------------------------------------------------------------------------------------------------------------------------------------------------------------------------------------------------------------------------------------------------------------------------------------------------------------------------------------------------------------------------------------------------------|--------------------------------------------------------|------------------------------------------------------------------------------------------------------------------------------------------------------------------------------------------------------------------------------------------------------------------------------------------------------------------------------------------------------------------------------------------------------------------------------------------------------------------------------------------------------------------------------------------------------------------------------------------------------------------------------------------------------------------------------------------------------|----------------------------------------------------------------------------------------------------------------------------------------------------------------------------------------|
| <p>1<br/>2<br/>3<br/>4<br/>5<br/>6<br/>7<br/>8<br/>9<br/>10<br/>11<br/>12<br/>13<br/>14<br/>15<br/>16<br/>17<br/>18<br/>19<br/>20<br/>21<br/>22<br/>23<br/>24<br/>25<br/>26<br/>27</p> <p>Participants</p> | <p>6</p> | <p>(a) <i>Cohort study</i> - Give the eligibility criteria, and the sources and methods of selection of participants. Describe methods of follow-up<br/> <i>Case-control study</i> - Give the eligibility criteria, and the sources and methods of case ascertainment and control selection. Give the rationale for the choice of cases and controls<br/> <i>Cross-sectional study</i> - Give the eligibility criteria, and the sources and methods of selection of participants</p> <p>(b) <i>Cohort study</i> - For matched studies, give matching criteria and number of exposed and unexposed<br/> <i>Case-control study</i> - For matched studies, give matching criteria and the number of controls per case</p> | <p>(a)P5L12-L20<br/> (b)This is no matched studies</p> | <p>RECORD 6.1: The methods of study population selection (such as codes or algorithms used to identify subjects) should be listed in detail. If this is not possible, an explanation should be provided.</p> <p>RECORD 6.2: Any validation studies of the codes or algorithms used to select the population should be referenced. If validation was conducted for this study and not published elsewhere, detailed methods and results should be provided.</p> <p>RECORD 6.3: If the study involved linkage of databases, consider use of a flow diagram or other graphical display to demonstrate the data linkage process, including the number of individuals with linked data at each stage.</p> | <p>6.1 P5L2-L11, P5L12-17<br/> 6.2 P5L2-L11, P5L12-17<br/> 6.3 There is no linkage between databases</p>                                                                               |
| <p>28<br/>29<br/>30<br/>31<br/>32<br/>33<br/>34<br/>35<br/>36<br/>37<br/>38</p> <p>Variables</p>                                                                                                           | <p>7</p> | <p>Clearly define all outcomes, exposures, predictors, potential confounders, and effect modifiers. Give diagnostic criteria, if applicable.</p>                                                                                                                                                                                                                                                                                                                                                                                                                                                                                                                                                                       | <p>P5L21-P9L3</p>                                      | <p>RECORD 7.1: A complete list of codes and algorithms used to classify exposures, outcomes, confounders, and effect modifiers should be provided. If these cannot be reported, an explanation should be provided.</p>                                                                                                                                                                                                                                                                                                                                                                                                                                                                               | <p>In this study, only J93 patients were considered out of the data of the entire population from the start, and no confounders. Explanations of other outcomes are in P5L21-P9L3.</p> |
| <p>39<br/>40<br/>41<br/>42<br/>43<br/>44</p> <p>Data sources/<br/>measurement</p>                                                                                                                          | <p>8</p> | <p>For each variable of interest, give sources of data and details of methods of assessment (measurement).</p>                                                                                                                                                                                                                                                                                                                                                                                                                                                                                                                                                                                                         | <p>P5L21-P9L3</p>                                      |                                                                                                                                                                                                                                                                                                                                                                                                                                                                                                                                                                                                                                                                                                      |                                                                                                                                                                                        |

|                                  |    |                                                                                                                                                                                                                                                                                                                                                                                                                                                                                                                                                                      |                         |                                                                                                                                                       |                            |
|----------------------------------|----|----------------------------------------------------------------------------------------------------------------------------------------------------------------------------------------------------------------------------------------------------------------------------------------------------------------------------------------------------------------------------------------------------------------------------------------------------------------------------------------------------------------------------------------------------------------------|-------------------------|-------------------------------------------------------------------------------------------------------------------------------------------------------|----------------------------|
|                                  |    | Describe comparability of assessment methods if there is more than one group                                                                                                                                                                                                                                                                                                                                                                                                                                                                                         |                         |                                                                                                                                                       |                            |
| Bias                             | 9  | Describe any efforts to address potential sources of bias                                                                                                                                                                                                                                                                                                                                                                                                                                                                                                            | P5L7-L11                |                                                                                                                                                       |                            |
| Study size                       | 10 | Explain how the study size was arrived at                                                                                                                                                                                                                                                                                                                                                                                                                                                                                                                            | P5L2-L11                |                                                                                                                                                       |                            |
| Quantitative variables           | 11 | Explain how quantitative variables were handled in the analyses. If applicable, describe which groupings were chosen, and why                                                                                                                                                                                                                                                                                                                                                                                                                                        | P5L25-P6L2<br>P6L27-L28 |                                                                                                                                                       |                            |
| Statistical methods              | 12 | (a) Describe all statistical methods, including those used to control for confounding<br>(b) Describe any methods used to examine subgroups and interactions<br>(c) Explain how missing data were addressed<br>(d) <i>Cohort study</i> - If applicable, explain how loss to follow-up was addressed<br><i>Case-control study</i> - If applicable, explain how matching of cases and controls was addressed<br><i>Cross-sectional study</i> - If applicable, describe analytical methods taking account of sampling strategy<br>(e) Describe any sensitivity analyses | P8L21-P9L3              |                                                                                                                                                       |                            |
| Data access and cleaning methods |    | ..                                                                                                                                                                                                                                                                                                                                                                                                                                                                                                                                                                   |                         | RECORD 12.1: Authors should describe the extent to which the investigators had access to the database population used to create the study population. | 12.1 P5L2-L11<br>12.2 P9L2 |

|                  |    |                                                                                                                                                                                                                                                                                                                                                 |                                                                                                                                                                                     |                                                                                                                                                                                                                                                                                                                    |                                                                                                                                                                    |
|------------------|----|-------------------------------------------------------------------------------------------------------------------------------------------------------------------------------------------------------------------------------------------------------------------------------------------------------------------------------------------------|-------------------------------------------------------------------------------------------------------------------------------------------------------------------------------------|--------------------------------------------------------------------------------------------------------------------------------------------------------------------------------------------------------------------------------------------------------------------------------------------------------------------|--------------------------------------------------------------------------------------------------------------------------------------------------------------------|
|                  |    |                                                                                                                                                                                                                                                                                                                                                 |                                                                                                                                                                                     | RECORD 12.2: Authors should provide information on the data cleaning methods used in the study.                                                                                                                                                                                                                    |                                                                                                                                                                    |
| Linkage          |    | ..                                                                                                                                                                                                                                                                                                                                              |                                                                                                                                                                                     | RECORD 12.3: State whether the study included person-level, institutional-level, or other data linkage across two or more databases. The methods of linkage and methods of linkage quality evaluation should be provided.                                                                                          | none                                                                                                                                                               |
| <b>Results</b>   |    |                                                                                                                                                                                                                                                                                                                                                 |                                                                                                                                                                                     |                                                                                                                                                                                                                                                                                                                    |                                                                                                                                                                    |
| Participants     | 13 | (a) Report the numbers of individuals at each stage of the study ( <i>e.g.</i> , numbers potentially eligible, examined for eligibility, confirmed eligible, included in the study, completing follow-up, and analysed)<br>(b) Give reasons for non-participation at each stage.<br>(c) Consider use of a flow diagram                          | P9L9, Table 1<br>In this study, only J93 patients were considered out of the data of the entire population from the start, Thus, it was quite difficult for us to draw a flowchart. | RECORD 13.1: Describe in detail the selection of the persons included in the study ( <i>i.e.</i> , study population selection) including filtering based on data quality, data availability and linkage. The selection of included persons can be described in the text and/or by means of the study flow diagram. | In this study, only J93 patients were considered out of the data of the entire population from the start, Thus, it was quite difficult for us to draw a flowchart. |
| Descriptive data | 14 | (a) Give characteristics of study participants ( <i>e.g.</i> , demographic, clinical, social) and information on exposures and potential confounders<br>(b) Indicate the number of participants with missing data for each variable of interest<br>(c) <i>Cohort study</i> - summarise follow-up time ( <i>e.g.</i> , average and total amount) | (a)P9L10<br>(b)none missing data                                                                                                                                                    |                                                                                                                                                                                                                                                                                                                    |                                                                                                                                                                    |
| Outcome data     | 15 | <i>Cohort study</i> - Report numbers of outcome events or summary measures over time                                                                                                                                                                                                                                                            | P10L2-P19L3                                                                                                                                                                         |                                                                                                                                                                                                                                                                                                                    |                                                                                                                                                                    |



|                   |    |                                                                                                                                                                                                                                                                                                                                                                                                                                |                                                    |                                                                                                                                                                                                                                                                                                          |                |
|-------------------|----|--------------------------------------------------------------------------------------------------------------------------------------------------------------------------------------------------------------------------------------------------------------------------------------------------------------------------------------------------------------------------------------------------------------------------------|----------------------------------------------------|----------------------------------------------------------------------------------------------------------------------------------------------------------------------------------------------------------------------------------------------------------------------------------------------------------|----------------|
|                   |    | <p><i>Case-control study</i> - Report numbers in each exposure category, or summary measures of exposure</p> <p><i>Cross-sectional study</i> - Report numbers of outcome events or summary measures</p>                                                                                                                                                                                                                        |                                                    |                                                                                                                                                                                                                                                                                                          |                |
| Main results      | 16 | <p>(a) Give unadjusted estimates and, if applicable, confounder-adjusted estimates and their precision (e.g., 95% confidence interval). Make clear which confounders were adjusted for and why they were included</p> <p>(b) Report category boundaries when continuous variables were categorized</p> <p>(c) If relevant, consider translating estimates of relative risk into absolute risk for a meaningful time period</p> | This is descriptive study, so it is not applicable |                                                                                                                                                                                                                                                                                                          |                |
| Other analyses    | 17 | Report other analyses done—e.g., analyses of subgroups and interactions, and sensitivity analyses                                                                                                                                                                                                                                                                                                                              |                                                    |                                                                                                                                                                                                                                                                                                          |                |
| <b>Discussion</b> |    |                                                                                                                                                                                                                                                                                                                                                                                                                                |                                                    |                                                                                                                                                                                                                                                                                                          |                |
| Key results       | 18 | Summarise key results with reference to study objectives                                                                                                                                                                                                                                                                                                                                                                       | P21L2, P22L1, P22L8, P22L26,                       |                                                                                                                                                                                                                                                                                                          |                |
| Limitations       | 19 | Discuss limitations of the study, taking into account sources of potential bias or imprecision. Discuss both direction and magnitude of any potential bias                                                                                                                                                                                                                                                                     | P23L21-P24L8                                       | RECORD 19.1: Discuss the implications of using data that were not created or collected to answer the specific research question(s). Include discussion of misclassification bias, unmeasured confounding, missing data, and changing eligibility over time, as they pertain to the study being reported. | Not applicable |

|                                  |                                                           |    |                                                                                                                                                                            |            |                                                                                                                                                                       |
|----------------------------------|-----------------------------------------------------------|----|----------------------------------------------------------------------------------------------------------------------------------------------------------------------------|------------|-----------------------------------------------------------------------------------------------------------------------------------------------------------------------|
| 1<br>2<br>3<br>4<br>5<br>6<br>7  | Interpretation                                            | 20 | Give a cautious overall interpretation of results considering objectives, limitations, multiplicity of analyses, results from similar studies, and other relevant evidence | P23L25-L30 |                                                                                                                                                                       |
| 8<br>9<br>10<br>11               | Generalisability                                          | 21 | Discuss the generalisability (external validity) of the study results                                                                                                      | P24L9-L11  |                                                                                                                                                                       |
| 12                               | <b>Other Information</b>                                  |    |                                                                                                                                                                            |            |                                                                                                                                                                       |
| 13<br>14<br>15<br>16<br>17<br>18 | Funding                                                   | 22 | Give the source of funding and the role of the funders for the present study and, if applicable, for the original study on which the present article is based              | P25L8-L10  |                                                                                                                                                                       |
| 19<br>20<br>21<br>22<br>23<br>24 | Accessibility of protocol, raw data, and programming code |    | ..                                                                                                                                                                         |            | RECORD 22.1: Authors should provide information on how to access any supplemental information such as the study protocol, raw data, or programming code. P25L16-P26L6 |

\*Reference: Benchimol EI, Smeeth L, Guttman A, Harron K, Moher D, Petersen I, Sørensen HT, von Elm E, Langan SM, the RECORD Working Committee. The REporting of studies Conducted using Observational Routinely-collected health Data (RECORD) Statement. *PLoS Medicine* 2015; in press.

\*Checklist is protected under Creative Commons Attribution ([CC BY](https://creativecommons.org/licenses/by/4.0/)) license.
