# Supplementary material for: Epidemiology and medical service use for spontaneous pneumothorax: a 12-year study using nationwide cohort data in Korea
Source: PubMed Central journal article supplement — BMJ Open. 2019 Oct 28;9(10):e028624. doi: 10.1136/bmjopen-2018-028624 (PMC6830684; doi:10.1136/bmjopen-2018-028624), 2019-10-28
Supplement: bmjopen-2018-028624supp005.pdf [file bmjopen-2018-028624supp005.pdf]

**Supplement Table 1.** ICD-10 codes of comorbidities in spontaneous pneumothorax

| <b>Disease</b>                   | <b>Code</b>                                     |
|----------------------------------|-------------------------------------------------|
| <b>COPD</b>                      | J40*, J41*, J42*, J43*, J44*, J961, J982        |
| <b>Pneumonia</b>                 | J12*, J13*, J14*, J15*, J16*, J18*              |
| <b>Interstitial lung disease</b> | J84*                                            |
| <b>Lung cancer</b>               | C34*, C780*, C783, D022-D024, D143*, D174, D381 |
| <b>Asthma</b>                    | J45*                                            |
| <b>Lung abscess</b>              | J850, J851, J852                                |

ICD-10, International Statistical Classification of Disease and Related Health Problems, 10<sup>th</sup> revision; COPD, Chronic Obstructive Pulmonary Disease

**Supplement Table 2.** Prevalence rate of spontaneous pneumothorax per 100,000 individuals and sociodemographic characteristics

|                          | 2002 |       | 2003 |       | 2004 |       | 2005 |       | 2006 |       | 2007 |       | 2008 |       | 2009 |       | 2010 |       | 2011 |       | 2012 |       | 2013 |       |
|--------------------------|------|-------|------|-------|------|-------|------|-------|------|-------|------|-------|------|-------|------|-------|------|-------|------|-------|------|-------|------|-------|
|                          | N    | Prev. |
| <b>Total SP Patients</b> | 398  | 38.8  | 490  | 48.2  | 504  | 49.6  | 514  | 50.5  | 518  | 51.7  | 555  | 54.4  | 557  | 55.7  | 610  | 61.1  | 598  | 59.7  | 661  | 65.7  | 623  | 61.6  | 616  | 60.7  |
| <b>Sex</b>               |      |       |      |       |      |       |      |       |      |       |      |       |      |       |      |       |      |       |      |       |      |       |      |       |
| Male                     | 322  | 62.7  | 404  | 79.3  | 412  | 81.1  | 422  | 83.0  | 424  | 84.7  | 471  | 92.4  | 474  | 94.6  | 519  | 103.9 | 518  | 103.3 | 547  | 108.7 | 532  | 105.2 | 524  | 103.3 |
| Female                   | 76   | 14.8  | 86   | 16.9  | 92   | 18.1  | 92   | 18.1  | 94   | 18.8  | 84   | 16.4  | 83   | 16.6  | 91   | 18.2  | 80   | 16.0  | 114  | 22.7  | 91   | 18.0  | 92   | 18.1  |
| <b>Age</b>               |      |       |      |       |      |       |      |       |      |       |      |       |      |       |      |       |      |       |      |       |      |       |      |       |
| < 15                     | 11   | 5.3   | 6    | 3.0   | 22   | 11.2  | 9    | 4.7   | 12   | 6.6   | 11   | 6.2   | 11   | 6.5   | 11   | 6.8   | 14   | 9.0   | 12   | 7.9   | 11   | 7.5   | 13   | 9.1   |
| 15–34                    | 220  | 64.8  | 281  | 86.3  | 298  | 93.9  | 281  | 90.4  | 297  | 99.3  | 311  | 103.2 | 328  | 112.6 | 382  | 133.2 | 344  | 120.6 | 376  | 132.4 | 359  | 127.2 | 329  | 117.1 |
| 35–64                    | 123  | 30.9  | 147  | 36.4  | 131  | 31.8  | 162  | 38.6  | 139  | 32.9  | 165  | 37.9  | 156  | 35.9  | 143  | 32.5  | 176  | 39.3  | 179  | 39.4  | 165  | 36.0  | 167  | 36.1  |
| ≥ 65                     | 55   | 69.1  | 62   | 71.7  | 75   | 82.6  | 71   | 74.8  | 82   | 83.2  | 79   | 74.6  | 73   | 68.4  | 85   | 77.3  | 78   | 68.8  | 106  | 90.3  | 99   | 80.5  | 120  | 93.5  |
| <b>Sub-divided Age</b>   |      |       |      |       |      |       |      |       |      |       |      |       |      |       |      |       |      |       |      |       |      |       |      |       |
| < 15                     | 11   | 5.3   | 6    | 3.0   | 22   | 11.2  | 9    | 4.7   | 12   | 6.6   | 11   | 6.2   | 11   | 6.5   | 11   | 6.8   | 14   | 9.0   | 12   | 7.9   | 11   | 7.5   | 13   | 9.1   |
| 15–19                    | 81   | 114.7 | 96   | 143.2 | 110  | 165.5 | 106  | 160.4 | 111  | 166.2 | 140  | 200.4 | 162  | 231.4 | 193  | 270.2 | 179  | 245.2 | 184  | 254.0 | 156  | 218.9 | 153  | 220.2 |
| 20–24                    | 54   | 63.7  | 91   | 109.1 | 71   | 89.2  | 66   | 86.9  | 73   | 104.6 | 71   | 104.9 | 58   | 91.3  | 77   | 122.8 | 77   | 123.2 | 92   | 142.8 | 105  | 156.8 | 93   | 134.6 |
| 25–29                    | 41   | 47.6  | 50   | 62.6  | 55   | 70.0  | 55   | 69.6  | 66   | 84.0  | 63   | 77.6  | 58   | 72.1  | 60   | 78.0  | 45   | 61.3  | 46   | 66.4  | 50   | 76.5  | 44   | 70.1  |
| 30–34                    | 33   | 33.6  | 38   | 39.9  | 40   | 43.1  | 45   | 50.2  | 35   | 41.6  | 26   | 31.4  | 39   | 50.5  | 41   | 54.1  | 29   | 38.0  | 42   | 53.9  | 37   | 47.1  | 26   | 32.7  |
| 35–39                    | 23   | 25.7  | 30   | 33.1  | 28   | 30.5  | 39   | 42.1  | 32   | 34.4  | 34   | 35.9  | 30   | 32.7  | 26   | 29.0  | 41   | 47.3  | 31   | 37.3  | 34   | 42.4  | 33   | 43.2  |
| 40–44                    | 19   | 20.0  | 23   | 24.6  | 21   | 22.9  | 26   | 28.9  | 18   | 20.9  | 23   | 26.6  | 21   | 24.2  | 28   | 31.7  | 24   | 26.8  | 30   | 32.9  | 26   | 28.3  | 25   | 27.5  |
| 45–49                    | 26   | 35.4  | 22   | 28.4  | 21   | 25.7  | 26   | 30.5  | 20   | 22.7  | 30   | 32.9  | 32   | 35.8  | 24   | 27.3  | 24   | 27.8  | 29   | 34.5  | 15   | 18.0  | 28   | 32.6  |
| 50–54                    | 13   | 24.2  | 23   | 42.4  | 22   | 38.8  | 19   | 30.8  | 21   | 31.7  | 26   | 36.9  | 26   | 35.5  | 23   | 29.6  | 26   | 32.0  | 33   | 38.6  | 35   | 40.0  | 25   | 28.4  |
| 55–59                    | 21   | 48.4  | 25   | 55.9  | 18   | 38.9  | 25   | 51.5  | 26   | 53.7  | 23   | 44.8  | 26   | 50.9  | 21   | 39.3  | 32   | 54.6  | 29   | 45.4  | 27   | 40.2  | 31   | 43.3  |
| 60–64                    | 21   | 48.7  | 24   | 55.1  | 21   | 48.8  | 27   | 64.2  | 22   | 54.0  | 29   | 70.6  | 21   | 50.3  | 21   | 48.5  | 29   | 63.5  | 27   | 58.4  | 28   | 57.8  | 25   | 50.5  |
| 65–69                    | 23   | 71.1  | 22   | 64.3  | 30   | 84.4  | 34   | 93.9  | 30   | 80.6  | 32   | 79.4  | 25   | 62.9  | 24   | 61.2  | 26   | 67.3  | 32   | 83.8  | 28   | 73.3  | 30   | 75.4  |
| 70–74                    | 16   | 74.4  | 19   | 82.4  | 21   | 85.7  | 15   | 57.0  | 25   | 90.1  | 25   | 85.1  | 24   | 80.2  | 33   | 105.6 | 14   | 43.6  | 22   | 65.5  | 12   | 33.2  | 27   | 73.2  |
| ≥ 75                     | 16   | 62.1  | 21   | 72.0  | 24   | 78.1  | 22   | 68.0  | 27   | 80.4  | 22   | 60.8  | 24   | 64.9  | 28   | 70.9  | 38   | 89.1  | 52   | 114.0 | 59   | 121.2 | 63   | 121.8 |
| <b>Income</b>            |      |       |      |       |      |       |      |       |      |       |      |       |      |       |      |       |      |       |      |       |      |       |      |       |
| Low (0–3)                | 71   | 31.1  | 99   | 43.9  | 116  | 51.3  | 129  | 54.8  | 92   | 39.7  | 125  | 52.0  | 116  | 48.4  | 127  | 54.4  | 117  | 48.8  | 163  | 67.3  | 150  | 68.1  | 170  | 70.3  |
| Medium (4–7)             | 164  | 40.9  | 194  | 49.3  | 188  | 48.2  | 190  | 49.4  | 212  | 56.0  | 206  | 53.8  | 213  | 57.3  | 229  | 61.8  | 213  | 58.0  | 237  | 64.7  | 190  | 54.2  | 196  | 53.3  |

|                           |     |      |     |      |     |      |     |      |     |      |     |      |     |      |     |      |     |      |     |       |     |      |     |       |
|---------------------------|-----|------|-----|------|-----|------|-----|------|-----|------|-----|------|-----|------|-----|------|-----|------|-----|-------|-----|------|-----|-------|
| High<br>(8–10)            | 163 | 41.1 | 197 | 49.5 | 200 | 50.0 | 195 | 49.2 | 214 | 54.6 | 224 | 56.3 | 228 | 58.5 | 254 | 64.4 | 268 | 67.8 | 261 | 65.5  | 283 | 64.2 | 250 | 61.7  |
| <b>Insurance type</b>     |     |      |     |      |     |      |     |      |     |      |     |      |     |      |     |      |     |      |     |       |     |      |     |       |
| <b>Region</b>             | 200 | 40.2 | 236 | 49.8 | 206 | 45.8 | 221 | 52.5 | 201 | 52.0 | 214 | 56.4 | 203 | 56.2 | 213 | 61.3 | 200 | 59.8 | 207 | 64.4  | 179 | 57.4 | 161 | 53.8  |
| <b>Employment</b>         | 195 | 39.3 | 252 | 49.2 | 292 | 54.7 | 285 | 51.1 | 315 | 54.6 | 336 | 55.8 | 346 | 57.6 | 390 | 63.3 | 396 | 62.6 | 419 | 64.4  | 414 | 62.0 | 415 | 60.5  |
| <b>Medical Assistance</b> | 3   | 9.8  | 2   | 6.3  | 6   | 18.1 | 8   | 21.1 | 2   | 5.1  | 5   | 12.7 | 8   | 20.5 | 7   | 19.8 | 2   | 5.7  | 35  | 103.7 | 30  | 95.8 | 40  | 132.9 |

Prev., Prevalence Rate

**Supplement Table 3.** Annual prevalence rate of hospitalization due to spontaneous pneumothorax (per 100,000 individuals)

| Hospitalization |     |         |             | Sex  |       |            |        |       |            | Age (years) |       |            |       |       |            |       |       |            |      |       |            |
|-----------------|-----|---------|-------------|------|-------|------------|--------|-------|------------|-------------|-------|------------|-------|-------|------------|-------|-------|------------|------|-------|------------|
| Year            | N   | Pre v.* | Gro w. (%)† | Male |       |            | Female |       |            | < 15        |       |            | 15–34 |       |            | 35–64 |       |            | ≥ 65 |       |            |
|                 |     |         |             | N    | Prev. | Grow. (%)† | N      | Prev. | Grow. (%)† | N           | Prev. | Grow. (%)† | N     | Prev. | Grow. (%)† | N     | Prev. | Grow. (%)† | N    | Prev. | Grow. (%)† |
| 2002            | 188 | 18.3    |             | 161  | 31.4  |            | 27     | 5.3   |            | 4           | 1.9   |            | 111   | 32.7  |            | 43    | 10.8  |            | 30   | 37.7  |            |
| 2003            | 236 | 23.2    | 26.5        | 202  | 39.7  | 26.5       | 34     | 6.7   | 26.9       | 2           | 1.0   | -48.4      | 135   | 41.5  | 26.9       | 62    | 15.3  | 42.0       | 37   | 42.8  | 13.7       |
| 2004            | 262 | 25.8    | 11.1        | 217  | 42.7  | 7.6        | 45     | 8.9   | 32.3       | 9           | 4.6   | 360.9      | 151   | 47.6  | 14.7       | 56    | 13.6  | -11.3      | 46   | 50.7  | 18.3       |
| 2005            | 276 | 27.1    | 5.3         | 235  | 46.2  | 8.3        | 41     | 8.1   | -8.9       | 3           | 1.6   | -65.7      | 161   | 51.8  | 8.9        | 74    | 17.6  | 29.6       | 38   | 40.1  | -20.9      |
| 2006            | 281 | 28.0    | 3.3         | 241  | 48.1  | 4.1        | 40     | 8.0   | -1.0       | 2           | 1.1   | -29.8      | 156   | 52.1  | 0.6        | 66    | 15.6  | -11.3      | 57   | 57.8  | 44.4       |
| 2007            | 286 | 28.0    | -0.1        | 244  | 47.8  | -0.6       | 42     | 8.2   | 3.0        | 4           | 2.2   | 103.9      | 169   | 56.1  | 7.5        | 73    | 16.8  | 7.4        | 40   | 37.8  | -34.7      |
| 2008            | 296 | 29.6    | 5.6         | 270  | 53.9  | 12.6       | 26     | 5.2   | -36.7      | 3           | 1.8   | -20.7      | 183   | 62.8  | 12.1       | 62    | 14.3  | -14.9      | 48   | 45.0  | 19.1       |
| 2009            | 327 | 32.7    | 10.7        | 279  | 55.8  | 3.6        | 48     | 9.6   | 85.0       | 4           | 2.5   | 39.3       | 215   | 74.9  | 19.3       | 59    | 13.4  | -6.1       | 49   | 44.5  | -1.0       |
| 2010            | 342 | 34.1    | 4.2         | 306  | 61.0  | 9.3        | 36     | 7.2   | -25.3      | 3           | 1.9   | -22.0      | 196   | 68.7  | -8.3       | 89    | 19.9  | 48.2       | 54   | 47.6  | 6.9        |
| 2011            | 364 | 36.2    | 6.0         | 307  | 61.0  | -0.1       | 57     | 11.3  | 57.6       | 3           | 2.0   | 2.7        | 208   | 73.3  | 6.6        | 82    | 20.1  | 1.2        | 71   | 43.4  | -8.9       |
| 2012            | 338 | 33.4    | -7.6        | 285  | 56.4  | -7.6       | 53     | 10.5  | -7.5       | 4           | 2.7   | 36.7       | 184   | 65.2  | -11.0      | 83    | 20.2  | 0.7        | 67   | 39.1  | -9.9       |
| 2013            | 338 | 33.3    | -0.4        | 291  | 57.4  | 1.8        | 47     | 9.3   | -11.7      | 4           | 2.8   | 2.8        | 175   | 62.3  | -4.5       | 86    | 20.8  | 3.0        | 73   | 41.0  | 5.0        |

Prev., \*Prevalence rate: rate of prevalence per 100,000 individuals.

Grow., †Growth rate (%) = (Current Year \*100) / Previous Year - 100

**Supplement Table 4.** Logistic regression analysis of factors affecting hospitalization rate in spontaneous pneumothorax patients

| Characteristics                     | Hospitalization  |              |                          |              |
|-------------------------------------|------------------|--------------|--------------------------|--------------|
|                                     | Unadjusted OR    | 95% CI       | Adjusted OR <sup>b</sup> | 95% CI       |
| <b>Sex</b>                          |                  |              |                          |              |
| M                                   | 1.39             | (1.23, 1.57) | 1.40                     | (1.24, 1.59) |
| F                                   | 1.0 <sup>a</sup> | -            | 1.0 <sup>a</sup>         | -            |
| <b>Age</b>                          |                  |              |                          |              |
| < 15                                | 0.19             | (0.10, 0.38) | 0.20                     | (0.10, 0.40) |
| 15–34                               | 1.52             | (1.37, 1.69) | 1.48                     | (1.32, 1.64) |
| 35–64                               | 1.0 <sup>a</sup> | -            | 1.0 <sup>a</sup>         | -            |
| ≥ 65                                | 1.74             | (1.52, 1.99) | 1.73                     | (1.51, 1.98) |
| <b>Income range</b>                 |                  |              |                          |              |
| Low (0–3)                           | 1.0 <sup>a</sup> | -            | 1.0 <sup>a</sup>         | -            |
| Medium (4–7)                        | 0.98             | (0.86, 1.11) | 0.97                     | (0.86, 1.10) |
| High (8–10)                         | 0.97             | (0.86, 1.09) | 0.95                     | (0.84, 1.07) |
| <b>Insurance Type</b>               |                  |              |                          |              |
| Region                              | 1.0 <sup>a</sup> | -            | 1.0 <sup>a</sup>         | -            |
| Job                                 | 1.00             | (0.91, 1.10) | 0.99                     | (0.90, 1.09) |
| Medical Assistance                  | 1.60             | (1.17, 2.19) | 1.57                     | (1.15, 2.15) |
| <b>Comorbidities</b><br>(ref. none) |                  |              |                          |              |
| COPD                                | 2.34             | (2.02, 2.72) | 2.38                     | (2.04, 2.77) |
| Pneumonia                           | 2.05             | (1.66, 2.55) | 2.08                     | (1.67, 2.59) |
| Interstitial                        | 3.77             | (1.66, 8.59) | 3.87                     | (1.69, 8.84) |
| Lung cancer                         | 2.14             | (1.53, 2.99) | 2.16                     | (1.54, 3.04) |
| Asthma                              | 2.03             | (1.63, 2.52) | 2.08                     | (1.67, 2.60) |
| Lung abscess                        | 1.09             | (0.29, 4.07) | 1.02                     | (0.27, 3.79) |

OR; odds ratio, CI; confidence intervals; M, male; F, female; COPD, chronic obstructive pulmonary disease  
a; reference group, b: adjusted for age and sex

**Supplement Table 5.** Rehospitalization of spontaneous pneumothorax patients

| Rehospitalization<br>(within)                | Number of<br>rehospitalizations |                 | Number of hospitalizations per person |       |         |         |
|----------------------------------------------|---------------------------------|-----------------|---------------------------------------|-------|---------|---------|
|                                              | N*                              | Cumulative<br>% | Mean                                  | SD    | Minimum | Maximum |
| 6 months                                     | 1,022                           | 60.7            | 1.34                                  | 0.70  | 1       | 10      |
| 1 year                                       | 1,202                           | 71.4            | 1.40                                  | 0.80  | 1       | 12      |
| 2 years                                      | 1,412                           | 83.9            | 1.47                                  | 0.94  | 1       | 19      |
| Total                                        | 1,683                           | 100.0           | 1.56                                  | 1.07  | 1       | 19      |
| <b>Interval between<br/>hospitalizations</b> |                                 |                 | 223.07                                | 445.3 | 0       | 3,989   |

\*N = Cumulative frequency; SD, standard deviation
