# Supplementary figures and images for: Epidemiology and medical service use for spontaneous pneumothorax: a 12-year study using nationwide cohort data in Korea
Source: PubMed Central journal article supplement — BMJ Open. 2019 Oct 28;9(10):e028624. doi: 10.1136/bmjopen-2018-028624 (PMC6830684; doi:10.1136/bmjopen-2018-028624), 2019-10-28

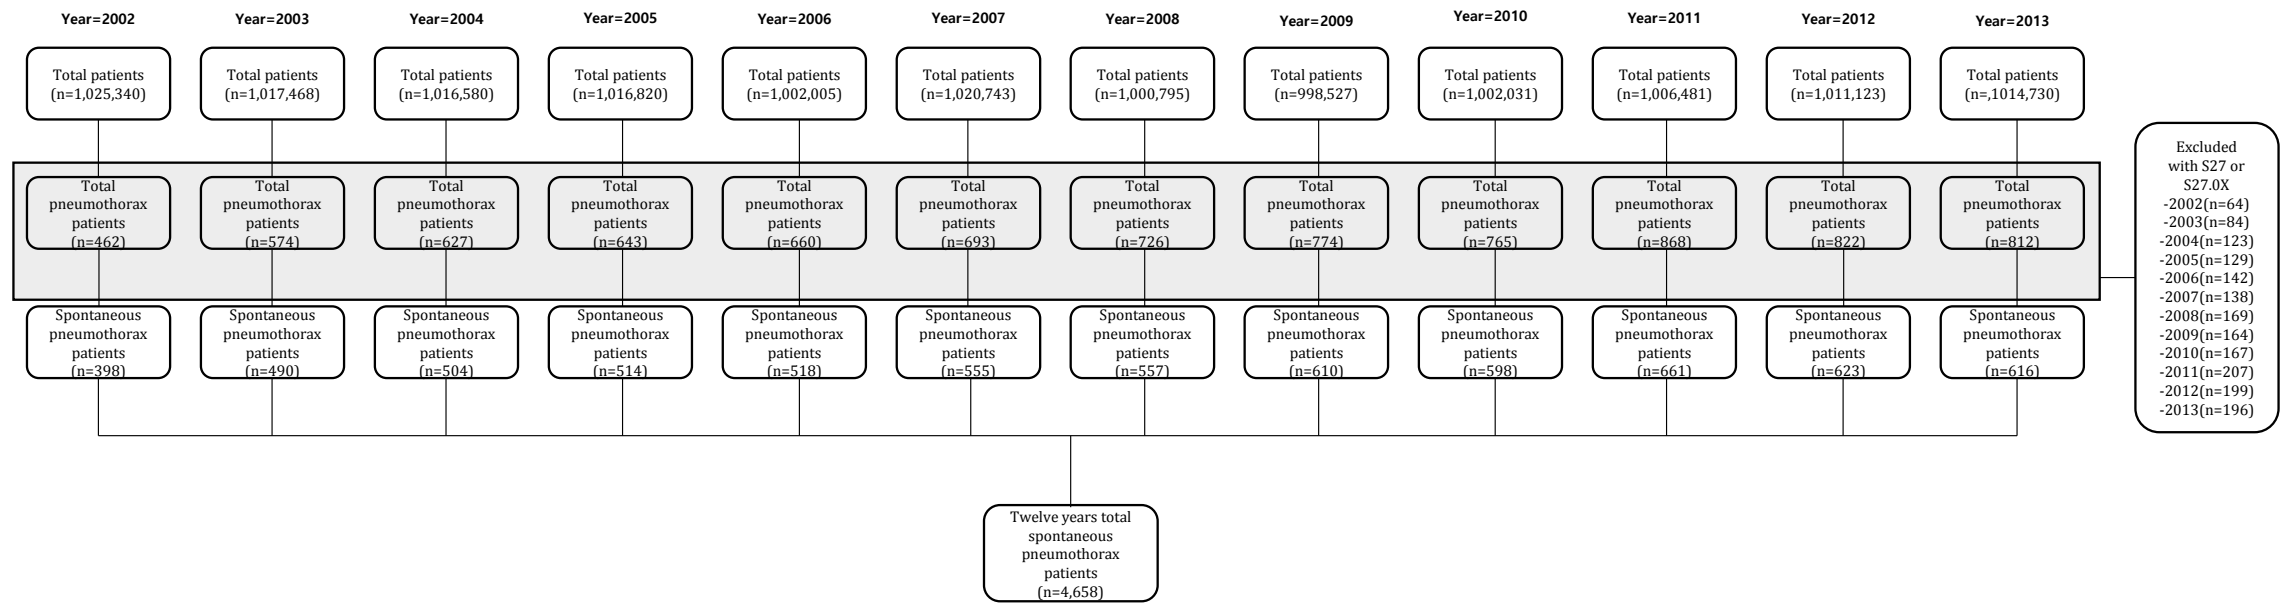

Supplement: bmjopen-2018-028624supp001.pdf [file bmjopen-2018-028624supp001.pdf]

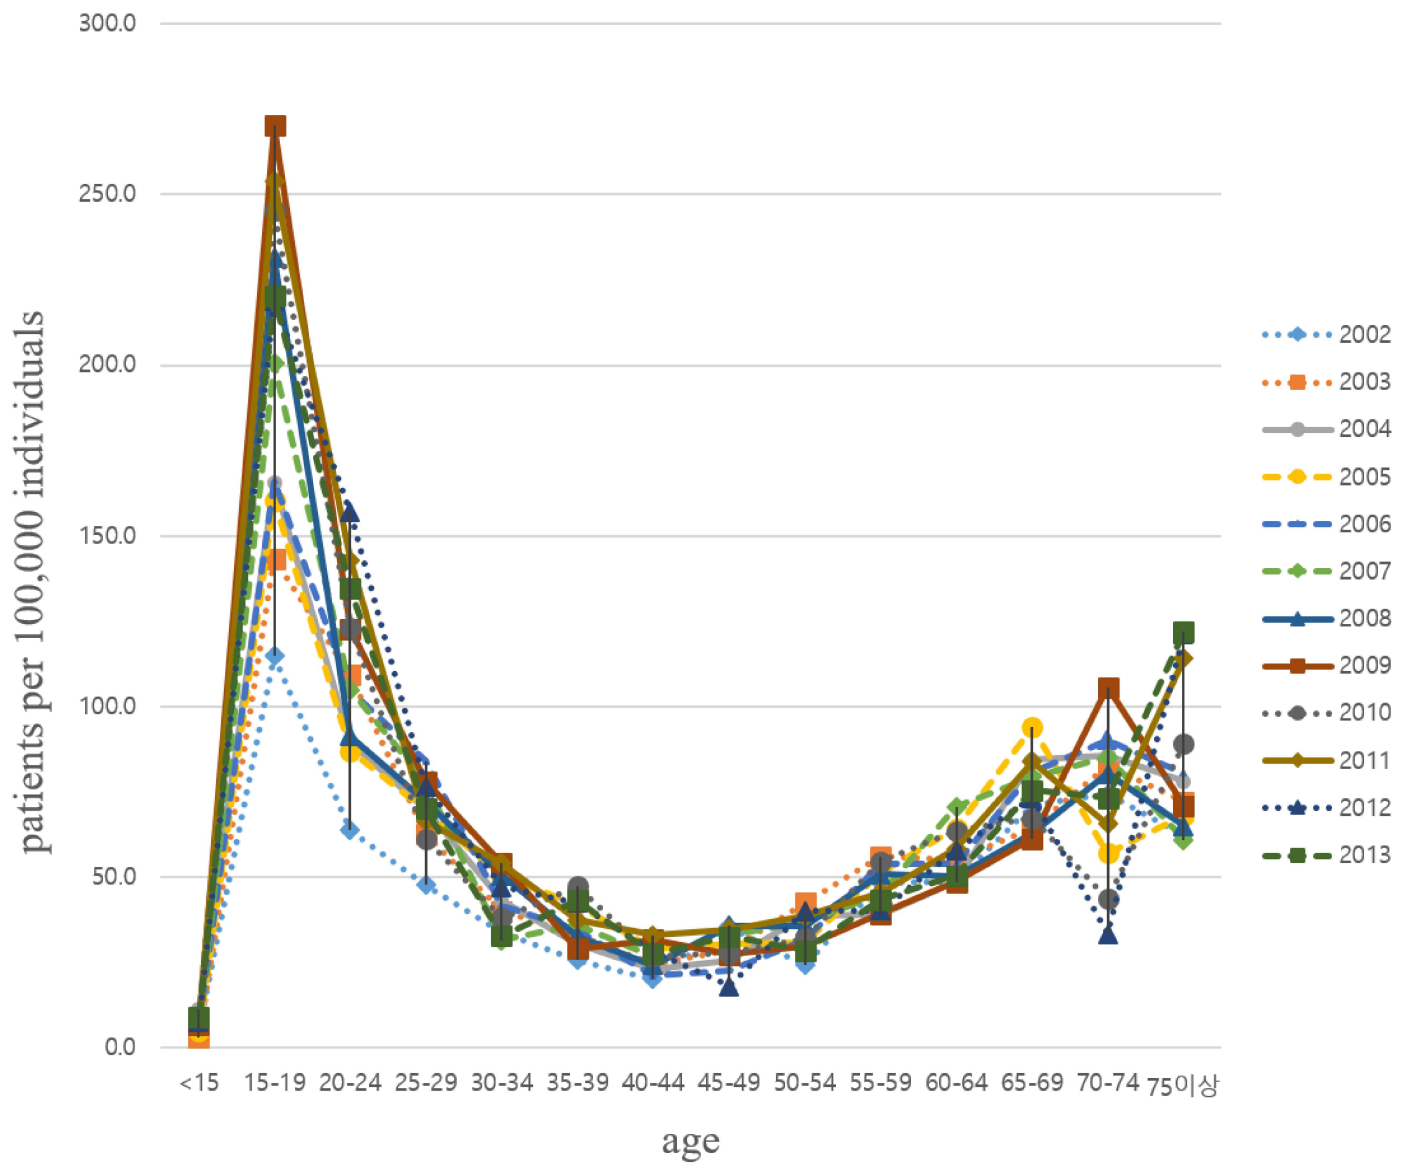

Supplement: bmjopen-2018-028624supp002.pdf [file bmjopen-2018-028624supp002.pdf]

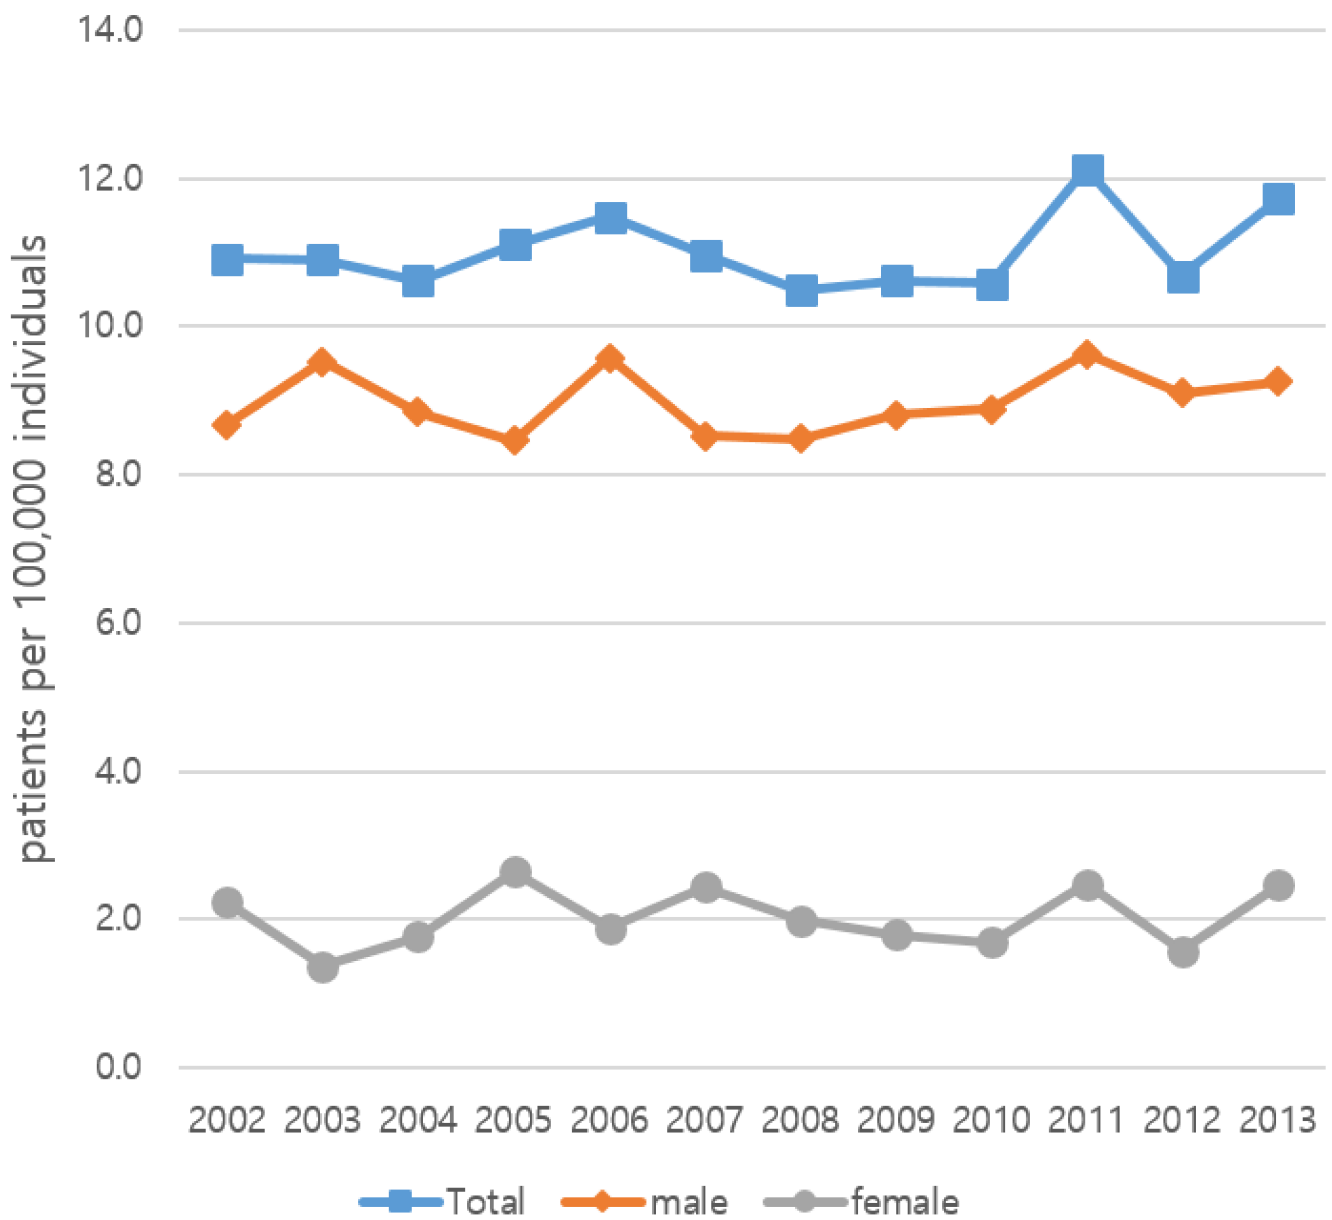

Supplement: bmjopen-2018-028624supp003.pdf [file bmjopen-2018-028624supp003.pdf]

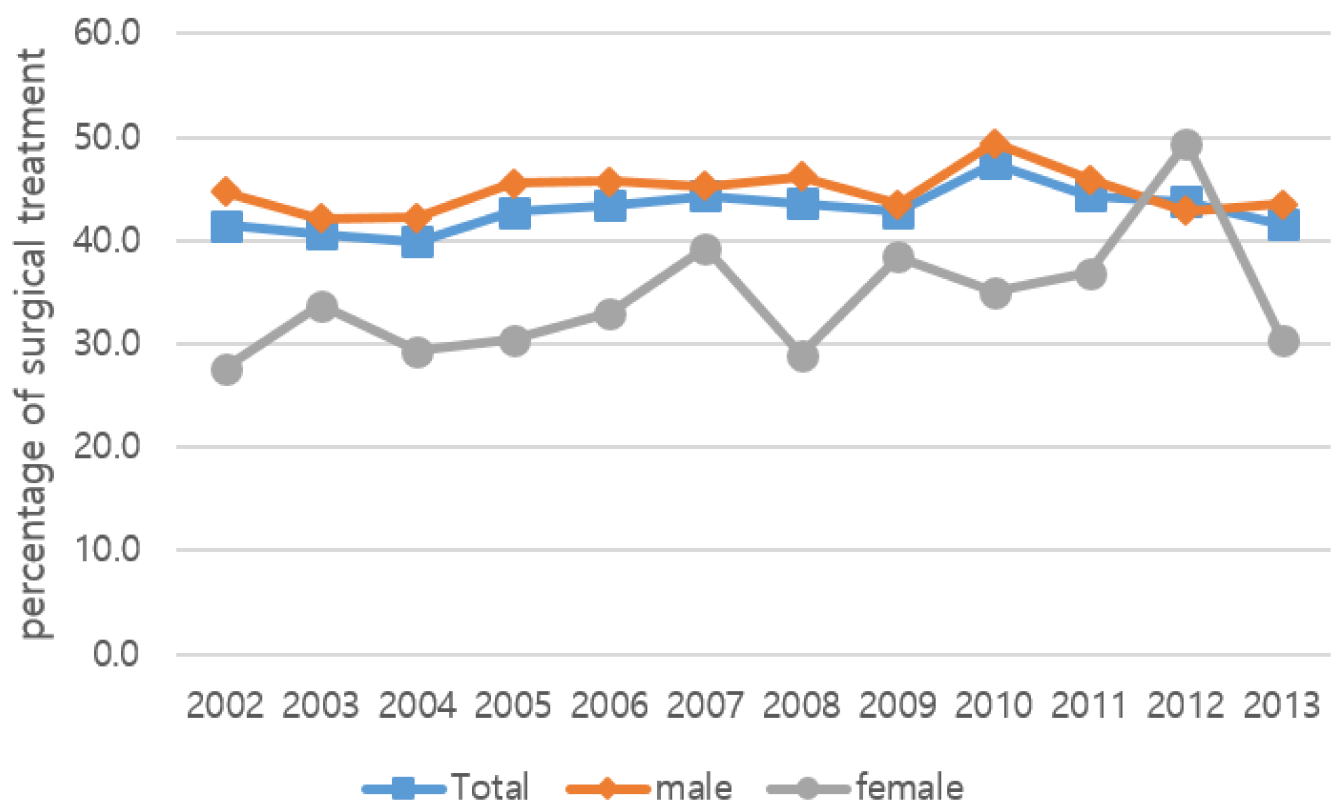

Supplement: bmjopen-2018-028624supp004.pdf [file bmjopen-2018-028624supp004.pdf]
